# Supplementary material for: Acetylcholine modulates the precision of prediction error in the auditory cortex
Source: eLife. 2024 Jan 19;12:RP91475. doi: 10.7554/eLife.91475 (PMC10942646; doi:10.7554/eLife.91475)
Supplement: Figure 2—source data 1. [file elife-91475-fig2-data1.xlsx]

## Sheet: Figure 2 FRAs
Figure 2A										Figure 2B
Control			Effect			Recovery				Control			Effect			Recovery
Frequency (kHz)	SPL (dB)	Spikes/trial	Frequency (kHz)	SPL (dB)	Spikes/trial	Frequency (kHz)	SPL (dB)	Spikes/trial		Frequency (kHz)	SPL (dB)	Spikes/trial	Frequency (kHz)	SPL (dB)	Spikes/trial	Frequency (kHz)	SPL (dB)	Spikes/trial
1	70	0.666667	1	70	0	1	70	0		1	70	0	1	70	0	1	70	0.333333
1	60	0.333333	1	60	0	1	60	0		1	60	0	1	60	0	1	60	0
1	50	0	1	50	0	1	50	0		1	50	0.666667	1	50	0	1	50	0
1	40	0	1	40	0	1	40	0		1	40	0.333333	1	40	0	1	40	0
1	30	0	1	30	0	1	30	0		1	30	0.333333	1	30	0	1	30	0
1	20	0	1	20	0	1	20	0		1	20	0.333333	1	20	0	1	20	0.333333
1	10	0	1	10	0	1	10	0		1	10	0	1	10	0.333333	1	10	0
1	0	0	1	0	0	1	0	0.333333		1	0	0	1	0	0	1	0	0
1.12246	70	0.666667	1.12246	70	0.333333	1.12246	70	0		1.12246	70	0.333333	1.12246	70	0	1.12246	70	0
1.12246	60	0.666667	1.12246	60	0	1.12246	60	0		1.12246	60	1	1.12246	60	0	1.12246	60	0.666667
1.12246	50	0	1.12246	50	1	1.12246	50	0		1.12246	50	0	1.12246	50	0	1.12246	50	0.333333
1.12246	40	0	1.12246	40	0	1.12246	40	0		1.12246	40	0.666667	1.12246	40	0	1.12246	40	0
1.12246	30	0	1.12246	30	0	1.12246	30	0		1.12246	30	1	1.12246	30	0	1.12246	30	0
1.12246	20	0	1.12246	20	0	1.12246	20	0		1.12246	20	0.333333	1.12246	20	0	1.12246	20	0
1.12246	10	0	1.12246	10	0	1.12246	10	0		1.12246	10	0.333333	1.12246	10	0	1.12246	10	0
1.12246	0	0	1.12246	0	0	1.12246	0	0		1.12246	0	0.333333	1.12246	0	0	1.12246	0	0.333333
1.25992	70	0.666667	1.25992	70	0.333333	1.25992	70	0.333333		1.25992	70	0	1.25992	70	0	1.25992	70	1
1.25992	60	0.666667	1.25992	60	0	1.25992	60	0		1.25992	60	0.333333	1.25992	60	0	1.25992	60	0
1.25992	50	0	1.25992	50	1	1.25992	50	0		1.25992	50	0.333333	1.25992	50	0	1.25992	50	0.333333
1.25992	40	0	1.25992	40	0	1.25992	40	0		1.25992	40	0	1.25992	40	0	1.25992	40	0
1.25992	30	0.333333	1.25992	30	0	1.25992	30	0		1.25992	30	0	1.25992	30	0	1.25992	30	0
1.25992	20	0.666667	1.25992	20	0.333333	1.25992	20	0		1.25992	20	0.666667	1.25992	20	0	1.25992	20	0.333333
1.25992	10	0	1.25992	10	0.666667	1.25992	10	0		1.25992	10	0.333333	1.25992	10	0.333333	1.25992	10	0
1.25992	0	0	1.25992	0	1	1.25992	0	0		1.25992	0	0	1.25992	0	2.33333	1.25992	0	0.333333
1.41421	70	0	1.41421	70	0	1.41421	70	0		1.41421	70	0	1.41421	70	0	1.41421	70	0
1.41421	60	0	1.41421	60	0	1.41421	60	0		1.41421	60	0	1.41421	60	0	1.41421	60	0
1.41421	50	0	1.41421	50	0	1.41421	50	0		1.41421	50	0	1.41421	50	0	1.41421	50	0
1.41421	40	0	1.41421	40	0	1.41421	40	0		1.41421	40	0	1.41421	40	0	1.41421	40	0
1.41421	30	0	1.41421	30	0	1.41421	30	0		1.41421	30	0	1.41421	30	0	1.41421	30	0.333333
1.41421	20	0	1.41421	20	0	1.41421	20	0		1.41421	20	0.333333	1.41421	20	0.333333	1.41421	20	1
1.41421	10	0	1.41421	10	0	1.41421	10	0		1.41421	10	0.333333	1.41421	10	0	1.41421	10	0
1.41421	0	0	1.41421	0	0.333333	1.41421	0	0		1.41421	0	0.333333	1.41421	0	0	1.41421	0	0
1.5874	70	1	1.5874	70	0	1.5874	70	0		1.5874	70	0.333333	1.5874	70	0.666667	1.5874	70	1.33333
1.5874	60	0	1.5874	60	0	1.5874	60	0		1.5874	60	0.666667	1.5874	60	0	1.5874	60	0
1.5874	50	0	1.5874	50	0.666667	1.5874	50	0		1.5874	50	1	1.5874	50	0	1.5874	50	0
1.5874	40	0	1.5874	40	0	1.5874	40	0.333333		1.5874	40	1	1.5874	40	0.333333	1.5874	40	0
1.5874	30	0	1.5874	30	0	1.5874	30	0		1.5874	30	0	1.5874	30	0	1.5874	30	0
1.5874	20	0	1.5874	20	0	1.5874	20	0		1.5874	20	1.66667	1.5874	20	0	1.5874	20	0
1.5874	10	0	1.5874	10	0	1.5874	10	0		1.5874	10	0	1.5874	10	0	1.5874	10	0
1.5874	0	0	1.5874	0	0.333333	1.5874	0	0		1.5874	0	0.666667	1.5874	0	0	1.5874	0	0.333333
1.7818	70	0	1.7818	70	0.333333	1.7818	70	0		1.7818	70	0	1.7818	70	0.333333	1.7818	70	0.333333
1.7818	60	0.333333	1.7818	60	0	1.7818	60	0		1.7818	60	0.333333	1.7818	60	0.333333	1.7818	60	0
1.7818	50	0	1.7818	50	1	1.7818	50	0		1.7818	50	0.666667	1.7818	50	0	1.7818	50	1.33333
1.7818	40	0	1.7818	40	0	1.7818	40	0		1.7818	40	0	1.7818	40	0	1.7818	40	0
1.7818	30	0	1.7818	30	0	1.7818	30	0		1.7818	30	0.666667	1.7818	30	0	1.7818	30	0
1.7818	20	0	1.7818	20	0	1.7818	20	0		1.7818	20	0	1.7818	20	0	1.7818	20	1.66667
1.7818	10	0	1.7818	10	0.666667	1.7818	10	0		1.7818	10	0.666667	1.7818	10	0	1.7818	10	0.333333
1.7818	0	0	1.7818	0	0	1.7818	0	0		1.7818	0	0	1.7818	0	0	1.7818	0	0
2	70	0.333333	2	70	0.333333	2	70	0.333333		2	70	0.333333	2	70	0	2	70	0
2	60	0.333333	2	60	0	2	60	0		2	60	0.333333	2	60	0	2	60	0
2	50	0	2	50	0	2	50	0		2	50	0.333333	2	50	0	2	50	0
2	40	0	2	40	0	2	40	0		2	40	0	2	40	0	2	40	0
2	30	0	2	30	0	2	30	0		2	30	0.333333	2	30	0	2	30	0.333333
2	20	0	2	20	0	2	20	0		2	20	0.666667	2	20	0	2	20	3.33333
2	10	0	2	10	0	2	10	0		2	10	0.333333	2	10	0.666667	2	10	0
2	0	0	2	0	0	2	0	0		2	0	0	2	0	1.33333	2	0	0
2.24492	70	1	2.24492	70	0.666667	2.24492	70	0		2.24492	70	0	2.24492	70	0	2.24492	70	0.333333
2.24492	60	0	2.24492	60	0	2.24492	60	0		2.24492	60	0	2.24492	60	1.33333	2.24492	60	0
2.24492	50	0	2.24492	50	0	2.24492	50	0		2.24492	50	0.666667	2.24492	50	0	2.24492	50	0
2.24492	40	0	2.24492	40	0	2.24492	40	0		2.24492	40	0.333333	2.24492	40	0	2.24492	40	0.333333
2.24492	30	0	2.24492	30	0	2.24492	30	0		2.24492	30	0	2.24492	30	0	2.24492	30	3.66667
2.24492	20	0	2.24492	20	0	2.24492	20	0		2.24492	20	0.333333	2.24492	20	0	2.24492	20	0.666667
2.24492	10	0	2.24492	10	0.666667	2.24492	10	0		2.24492	10	0.666667	2.24492	10	0	2.24492	10	0
2.24492	0	0	2.24492	0	0.333333	2.24492	0	0		2.24492	0	1.33333	2.24492	0	3	2.24492	0	0
2.51984	70	1	2.51984	70	0.333333	2.51984	70	0		2.51984	70	0	2.51984	70	0	2.51984	70	0
2.51984	60	1	2.51984	60	0	2.51984	60	0		2.51984	60	0.333333	2.51984	60	0.333333	2.51984	60	0
2.51984	50	0	2.51984	50	0	2.51984	50	0		2.51984	50	0.333333	2.51984	50	0	2.51984	50	0
2.51984	40	0	2.51984	40	1	2.51984	40	0		2.51984	40	0	2.51984	40	0	2.51984	40	0
2.51984	30	0	2.51984	30	0	2.51984	30	0		2.51984	30	1.33333	2.51984	30	0	2.51984	30	0.333333
2.51984	20	0	2.51984	20	0.666667	2.51984	20	0		2.51984	20	0.333333	2.51984	20	0	2.51984	20	1.33333
2.51984	10	0	2.51984	10	0.666667	2.51984	10	0		2.51984	10	0.333333	2.51984	10	1	2.51984	10	0
2.51984	0	0	2.51984	0	0	2.51984	0	0		2.51984	0	1.33333	2.51984	0	0	2.51984	0	0
2.82843	70	1	2.82843	70	0.333333	2.82843	70	0		2.82843	70	0	2.82843	70	0.333333	2.82843	70	1
2.82843	60	0.666667	2.82843	60	0	2.82843	60	0		2.82843	60	0	2.82843	60	0	2.82843	60	0
2.82843	50	0	2.82843	50	0	2.82843	50	0		2.82843	50	0	2.82843	50	0	2.82843	50	1.66667
2.82843	40	0	2.82843	40	0	2.82843	40	0		2.82843	40	0	2.82843	40	0.333333	2.82843	40	0
2.82843	30	0	2.82843	30	0	2.82843	30	0		2.82843	30	0.333333	2.82843	30	0	2.82843	30	0
2.82843	20	0	2.82843	20	0	2.82843	20	0		2.82843	20	0.666667	2.82843	20	0	2.82843	20	0
2.82843	10	0	2.82843	10	0	2.82843	10	0		2.82843	10	0.333333	2.82843	10	0	2.82843	10	0.666667
2.82843	0	0	2.82843	0	0	2.82843	0	0		2.82843	0	0.333333	2.82843	0	0	2.82843	0	0
3.1748	70	0.333333	3.1748	70	0.666667	3.1748	70	0		3.1748	70	0	3.1748	70	0	3.1748	70	0
3.1748	60	1	3.1748	60	0	3.1748	60	0		3.1748	60	0.333333	3.1748	60	0	3.1748	60	0
3.1748	50	0	3.1748	50	0	3.1748	50	0		3.1748	50	0.333333	3.1748	50	0.333333	3.1748	50	0
3.1748	40	0	3.1748	40	0	3.1748	40	0		3.1748	40	0	3.1748	40	0	3.1748	40	0.333333
3.1748	30	0	3.1748	30	0	3.1748	30	0		3.1748	30	0.666667	3.1748	30	0	3.1748	30	0
3.1748	20	0	3.1748	20	0	3.1748	20	0		3.1748	20	0	3.1748	20	0	3.1748	20	0
3.1748	10	0	3.1748	10	0	3.1748	10	0		3.1748	10	0	3.1748	10	0	3.1748	10	0
3.1748	0	0	3.1748	0	0	3.1748	0	0		3.1748	0	1	3.1748	0	1	3.1748	0	0.666667
3.56359	70	0.333333	3.56359	70	0.333333	3.56359	70	0		3.56359	70	0	3.56359	70	0	3.56359	70	0.666667
3.56359	60	0	3.56359	60	0	3.56359	60	0		3.56359	60	0	3.56359	60	0	3.56359	60	2
3.56359	50	0	3.56359	50	0.666667	3.56359	50	0		3.56359	50	0.666667	3.56359	50	0	3.56359	50	0
3.56359	40	0	3.56359	40	0	3.56359	40	0		3.56359	40	0	3.56359	40	1	3.56359	40	0
3.56359	30	0	3.56359	30	0	3.56359	30	0		3.56359	30	1	3.56359	30	0	3.56359	30	1.66667
3.56359	20	0	3.56359	20	0	3.56359	20	0		3.56359	20	1.33333	3.56359	20	0	3.56359	20	0
3.56359	10	0	3.56359	10	0	3.56359	10	0		3.56359	10	0.333333	3.56359	10	0.333333	3.56359	10	0
3.56359	0	0	3.56359	0	0.333333	3.56359	0	0		3.56359	0	1	3.56359	0	0	3.56359	0	2.66667
4	70	1	4	70	1.33333	4	70	0		4	70	0.333333	4	70	1	4	70	0.333333
4	60	0	4	60	0.333333	4	60	0		4	60	0	4	60	0	4	60	0
4	50	0	4	50	0	4	50	0		4	50	1	4	50	0	4	50	0
4	40	0	4	40	0	4	40	0		4	40	0	4	40	0.333333	4	40	0
4	30	0	4	30	0.333333	4	30	0		4	30	1.33333	4	30	0	4	30	0
4	20	0	4	20	0	4	20	0		4	20	0.333333	4	20	0.666667	4	20	0
4	10	0	4	10	0.333333	4	10	0		4	10	0.333333	4	10	0.333333	4	10	0.333333
4	0	0	4	0	0	4	0	0		4	0	0.666667	4	0	2.66667	4	0	3
4.48985	70	0.333333	4.48985	70	0	4.48985	70	0		4.48985	70	0.333333	4.48985	70	0	4.48985	70	0
4.48985	60	0	4.48985	60	0	4.48985	60	0		4.48985	60	0.333333	4.48985	60	0	4.48985	60	0
4.48985	50	0	4.48985	50	0	4.48985	50	0		4.48985	50	0.666667	4.48985	50	0	4.48985	50	0
4.48985	40	0	4.48985	40	0	4.48985	40	0		4.48985	40	0	4.48985	40	0	4.48985	40	0.333333
4.48985	30	0	4.48985	30	0	4.48985	30	0		4.48985	30	0	4.48985	30	0	4.48985	30	0
4.48985	20	0	4.48985	20	0	4.48985	20	0		4.48985	20	0.333333	4.48985	20	0.666667	4.48985	20	0
4.48985	10	0	4.48985	10	0.333333	4.48985	10	0		4.48985	10	0.666667	4.48985	10	0.333333	4.48985	10	0.333333
4.48985	0	0	4.48985	0	0	4.48985	0	0		4.48985	0	0	4.48985	0	0	4.48985	0	0
5.03968	70	0.333333	5.03968	70	0.666667	5.03968	70	0		5.03968	70	0.333333	5.03968	70	0	5.03968	70	0.333333
5.03968	60	1	5.03968	60	0.333333	5.03968	60	0		5.03968	60	0.666667	5.03968	60	0	5.03968	60	0
5.03968	50	0	5.03968	50	0.666667	5.03968	50	0		5.03968	50	0.333333	5.03968	50	0	5.03968	50	0
5.03968	40	0	5.03968	40	0.333333	5.03968	40	0		5.03968	40	0.333333	5.03968	40	0.333333	5.03968	40	0
5.03968	30	0	5.03968	30	0	5.03968	30	0		5.03968	30	0	5.03968	30	0	5.03968	30	0
5.03968	20	0	5.03968	20	1	5.03968	20	0		5.03968	20	1.33333	5.03968	20	1	5.03968	20	0
5.03968	10	0	5.03968	10	0.333333	5.03968	10	0		5.03968	10	0.333333	5.03968	10	0.333333	5.03968	10	0
5.03968	0	0	5.03968	0	0.333333	5.03968	0	0		5.03968	0	1	5.03968	0	2	5.03968	0	0.333333
5.65685	70	1	5.65685	70	0.333333	5.65685	70	0		5.65685	70	0	5.65685	70	0	5.65685	70	0.666667
5.65685	60	1	5.65685	60	0.333333	5.65685	60	0		5.65685	60	0.666667	5.65685	60	0	5.65685	60	0
5.65685	50	0	5.65685	50	0.333333	5.65685	50	0		5.65685	50	0	5.65685	50	0	5.65685	50	0.333333
5.65685	40	0	5.65685	40	0	5.65685	40	0		5.65685	40	0.333333	5.65685	40	0	5.65685	40	0
5.65685	30	0	5.65685	30	0	5.65685	30	0		5.65685	30	0.333333	5.65685	30	0	5.65685	30	0.333333
5.65685	20	0	5.65685	20	0	5.65685	20	0		5.65685	20	1.33333	5.65685	20	0	5.65685	20	0
5.65685	10	0	5.65685	10	0.333333	5.65685	10	0		5.65685	10	0.333333	5.65685	10	0	5.65685	10	0
5.65685	0	0	5.65685	0	0	5.65685	0	0		5.65685	0	0	5.65685	0	0	5.65685	0	0
6.3496	70	0.666667	6.3496	70	1.33333	6.3496	70	0.333333		6.3496	70	0	6.3496	70	0	6.3496	70	0.333333
6.3496	60	0.333333	6.3496	60	0	6.3496	60	0		6.3496	60	0	6.3496	60	0	6.3496	60	2
6.3496	50	0	6.3496	50	0.333333	6.3496	50	0		6.3496	50	0	6.3496	50	0	6.3496	50	0.333333
6.3496	40	0	6.3496	40	0	6.3496	40	0		6.3496	40	0	6.3496	40	0	6.3496	40	0
6.3496	30	0	6.3496	30	0.333333	6.3496	30	0		6.3496	30	1	6.3496	30	0	6.3496	30	1
6.3496	20	0	6.3496	20	0	6.3496	20	0		6.3496	20	0.333333	6.3496	20	0	6.3496	20	0
6.3496	10	0	6.3496	10	0	6.3496	10	0		6.3496	10	0	6.3496	10	0	6.3496	10	0
6.3496	0	0	6.3496	0	0.666667	6.3496	0	0.333333		6.3496	0	1	6.3496	0	0	6.3496	0	1.33333
7.12719	70	0.666667	7.12719	70	1.33333	7.12719	70	0		7.12719	70	5.33333	7.12719	70	1.33333	7.12719	70	0.666667
7.12719	60	0	7.12719	60	0	7.12719	60	0		7.12719	60	0.333333	7.12719	60	0.666667	7.12719	60	0
7.12719	50	0	7.12719	50	0	7.12719	50	0		7.12719	50	0.666667	7.12719	50	0	7.12719	50	0
7.12719	40	0	7.12719	40	0.666667	7.12719	40	0		7.12719	40	0.333333	7.12719	40	0	7.12719	40	0
7.12719	30	0	7.12719	30	0	7.12719	30	0		7.12719	30	0.333333	7.12719	30	0	7.12719	30	0
7.12719	20	0	7.12719	20	0	7.12719	20	0		7.12719	20	0	7.12719	20	0	7.12719	20	0.333333
7.12719	10	0	7.12719	10	0.333333	7.12719	10	0		7.12719	10	1.33333	7.12719	10	0	7.12719	10	0
7.12719	0	0	7.12719	0	0.666667	7.12719	0	0		7.12719	0	0.666667	7.12719	0	0	7.12719	0	0
8	70	3.33333	8	70	2.66667	8	70	0		8	70	2.33333	8	70	1	8	70	1.66667
8	60	1	8	60	0.333333	8	60	0		8	60	1	8	60	0	8	60	1.33333
8	50	0	8	50	0	8	50	0		8	50	0	8	50	0	8	50	0
8	40	0	8	40	0	8	40	0		8	40	0.333333	8	40	0	8	40	0.666667
8	30	0	8	30	0	8	30	0		8	30	0	8	30	0	8	30	0.333333
8	20	0	8	20	0.333333	8	20	0		8	20	0	8	20	0	8	20	0
8	10	0	8	10	0	8	10	0		8	10	0.666667	8	10	1.66667	8	10	0
8	0	0	8	0	0	8	0	0		8	0	0	8	0	0	8	0	4.66667
8.9797	70	1.66667	8.9797	70	0.333333	8.9797	70	0.333333		8.9797	70	1.66667	8.9797	70	0.333333	8.9797	70	1.33333
8.9797	60	0.333333	8.9797	60	0	8.9797	60	0		8.9797	60	1.33333	8.9797	60	1.33333	8.9797	60	0.666667
8.9797	50	0	8.9797	50	0.333333	8.9797	50	0		8.9797	50	0.666667	8.9797	50	0	8.9797	50	0.666667
8.9797	40	0	8.9797	40	0	8.9797	40	0.333333		8.9797	40	0	8.9797	40	0	8.9797	40	0
8.9797	30	0	8.9797	30	0.333333	8.9797	30	0		8.9797	30	0.666667	8.9797	30	0	8.9797	30	1.66667
8.9797	20	0	8.9797	20	0	8.9797	20	0		8.9797	20	3.33333	8.9797	20	0.333333	8.9797	20	0
8.9797	10	0	8.9797	10	0.666667	8.9797	10	0		8.9797	10	1	8.9797	10	0	8.9797	10	0.333333
8.9797	0	0	8.9797	0	0.666667	8.9797	0	0		8.9797	0	0	8.9797	0	0.333333	8.9797	0	0
10.0794	70	3.66667	10.0794	70	2.66667	10.0794	70	4.33333		10.0794	70	2	10.0794	70	0.666667	10.0794	70	2.33333
10.0794	60	0.333333	10.0794	60	0.666667	10.0794	60	0		10.0794	60	0.666667	10.0794	60	0	10.0794	60	0.666667
10.0794	50	0.666667	10.0794	50	0	10.0794	50	0		10.0794	50	1.66667	10.0794	50	0	10.0794	50	0.333333
10.0794	40	0	10.0794	40	0.333333	10.0794	40	0		10.0794	40	0	10.0794	40	0.333333	10.0794	40	1
10.0794	30	0	10.0794	30	0	10.0794	30	0		10.0794	30	0.666667	10.0794	30	0.666667	10.0794	30	0
10.0794	20	0	10.0794	20	0	10.0794	20	0		10.0794	20	0	10.0794	20	0	10.0794	20	0
10.0794	10	0	10.0794	10	0	10.0794	10	0		10.0794	10	0.333333	10.0794	10	0	10.0794	10	0
10.0794	0	0	10.0794	0	0	10.0794	0	0		10.0794	0	0.666667	10.0794	0	0.333333	10.0794	0	4.66667
11.3137	70	8.66667	11.3137	70	4.33333	11.3137	70	9.66667		11.3137	70	2	11.3137	70	0.333333	11.3137	70	1.66667
11.3137	60	2.33333	11.3137	60	1.33333	11.3137	60	4		11.3137	60	1.66667	11.3137	60	0.333333	11.3137	60	0.333333
11.3137	50	0	11.3137	50	0.333333	11.3137	50	2		11.3137	50	0.333333	11.3137	50	0	11.3137	50	0.666667
11.3137	40	0	11.3137	40	0	11.3137	40	0.333333		11.3137	40	0	11.3137	40	1.33333	11.3137	40	0
11.3137	30	0.333333	11.3137	30	0	11.3137	30	0		11.3137	30	0.666667	11.3137	30	0	11.3137	30	0
11.3137	20	0	11.3137	20	0	11.3137	20	0.333333		11.3137	20	0	11.3137	20	0	11.3137	20	0.666667
11.3137	10	0	11.3137	10	1	11.3137	10	0		11.3137	10	2.66667	11.3137	10	0	11.3137	10	0
11.3137	0	0	11.3137	0	0.333333	11.3137	0	0		11.3137	0	0.666667	11.3137	0	0	11.3137	0	0
12.6992	70	7.33333	12.6992	70	4.33333	12.6992	70	6.33333		12.6992	70	1.66667	12.6992	70	1.33333	12.6992	70	2
12.6992	60	3	12.6992	60	0.666667	12.6992	60	2		12.6992	60	0.666667	12.6992	60	0.333333	12.6992	60	1.66667
12.6992	50	2.66667	12.6992	50	0.333333	12.6992	50	0.666667		12.6992	50	1	12.6992	50	0	12.6992	50	1.33333
12.6992	40	0	12.6992	40	0	12.6992	40	1.66667		12.6992	40	0.333333	12.6992	40	0	12.6992	40	0
12.6992	30	0	12.6992	30	0	12.6992	30	0		12.6992	30	1	12.6992	30	0	12.6992	30	0
12.6992	20	0.333333	12.6992	20	0	12.6992	20	0		12.6992	20	1	12.6992	20	0	12.6992	20	0
12.6992	10	0	12.6992	10	0.666667	12.6992	10	0		12.6992	10	1.66667	12.6992	10	0	12.6992	10	0.666667
12.6992	0	0	12.6992	0	0.333333	12.6992	0	0		12.6992	0	0.333333	12.6992	0	0	12.6992	0	0.666667
14.2544	70	3.66667	14.2544	70	6	14.2544	70	4.33333		14.2544	70	1	14.2544	70	0.333333	14.2544	70	2.66667
14.2544	60	2.33333	14.2544	60	0.666667	14.2544	60	3.33333		14.2544	60	1.33333	14.2544	60	0	14.2544	60	0.666667
14.2544	50	1.33333	14.2544	50	0.333333	14.2544	50	0.666667		14.2544	50	1.33333	14.2544	50	0	14.2544	50	2
14.2544	40	0	14.2544	40	0	14.2544	40	2		14.2544	40	0.333333	14.2544	40	0.666667	14.2544	40	0
14.2544	30	0	14.2544	30	0.666667	14.2544	30	0		14.2544	30	1	14.2544	30	0	14.2544	30	2.66667
14.2544	20	0	14.2544	20	0.333333	14.2544	20	0		14.2544	20	2	14.2544	20	0	14.2544	20	0.666667
14.2544	10	0	14.2544	10	0.666667	14.2544	10	0		14.2544	10	0	14.2544	10	1.66667	14.2544	10	0
14.2544	0	0	14.2544	0	0.333333	14.2544	0	0		14.2544	0	0	14.2544	0	0	14.2544	0	1
16	70	5.66667	16	70	5.66667	16	70	7.66667		16	70	1.66667	16	70	1.66667	16	70	2.66667
16	60	3.33333	16	60	3	16	60	3		16	60	0.666667	16	60	0	16	60	0.666667
16	50	5.66667	16	50	0.666667	16	50	1.33333		16	50	1.33333	16	50	0	16	50	1
16	40	2.66667	16	40	0	16	40	1.33333		16	40	0.666667	16	40	0	16	40	0.666667
16	30	0	16	30	0	16	30	0		16	30	1.33333	16	30	0	16	30	0
16	20	0.333333	16	20	0	16	20	0		16	20	1.33333	16	20	0.333333	16	20	0.333333
16	10	0	16	10	0	16	10	0		16	10	0.333333	16	10	0	16	10	0
16	0	0	16	0	0	16	0	0		16	0	0.666667	16	0	0	16	0	0
17.9594	70	6.33333	17.9594	70	1	17.9594	70	6		17.9594	70	2.33333	17.9594	70	4.33333	17.9594	70	3
17.9594	60	4.33333	17.9594	60	2	17.9594	60	4.33333		17.9594	60	2.66667	17.9594	60	0	17.9594	60	2.33333
17.9594	50	2	17.9594	50	1.66667	17.9594	50	2		17.9594	50	0.666667	17.9594	50	0.666667	17.9594	50	0.333333
17.9594	40	0.333333	17.9594	40	1.33333	17.9594	40	3.33333		17.9594	40	0.333333	17.9594	40	0	17.9594	40	0.333333
17.9594	30	0.333333	17.9594	30	0	17.9594	30	0.666667		17.9594	30	1.33333	17.9594	30	0	17.9594	30	0
17.9594	20	0	17.9594	20	1	17.9594	20	0		17.9594	20	1	17.9594	20	0	17.9594	20	1.66667
17.9594	10	0	17.9594	10	1	17.9594	10	0		17.9594	10	1	17.9594	10	1.33333	17.9594	10	0
17.9594	0	0	17.9594	0	0	17.9594	0	0		17.9594	0	0	17.9594	0	0.333333	17.9594	0	0
20.1587	70	2.66667	20.1587	70	0.666667	20.1587	70	2		20.1587	70	1.66667	20.1587	70	0.333333	20.1587	70	3
20.1587	60	5	20.1587	60	1	20.1587	60	3.33333		20.1587	60	0.666667	20.1587	60	0	20.1587	60	0.333333
20.1587	50	2.33333	20.1587	50	0.666667	20.1587	50	2.33333		20.1587	50	1.33333	20.1587	50	0.333333	20.1587	50	0
20.1587	40	0	20.1587	40	0	20.1587	40	3.33333		20.1587	40	0.333333	20.1587	40	0.333333	20.1587	40	0
20.1587	30	1	20.1587	30	0	20.1587	30	0.666667		20.1587	30	2.33333	20.1587	30	0	20.1587	30	0
20.1587	20	0	20.1587	20	0.666667	20.1587	20	0		20.1587	20	0	20.1587	20	0	20.1587	20	0
20.1587	10	0	20.1587	10	0	20.1587	10	0		20.1587	10	1.66667	20.1587	10	1	20.1587	10	1.66667
20.1587	0	0	20.1587	0	0	20.1587	0	0		20.1587	0	0.333333	20.1587	0	0	20.1587	0	0
22.6274	70	3.33333	22.6274	70	0.333333	22.6274	70	0.666667		22.6274	70	3	22.6274	70	1.33333	22.6274	70	4
22.6274	60	2.33333	22.6274	60	0	22.6274	60	2		22.6274	60	2.33333	22.6274	60	0	22.6274	60	1.66667
22.6274	50	2.66667	22.6274	50	0.666667	22.6274	50	0		22.6274	50	0.666667	22.6274	50	0.666667	22.6274	50	0.333333
22.6274	40	1	22.6274	40	0.333333	22.6274	40	0.666667		22.6274	40	0.333333	22.6274	40	0	22.6274	40	0
22.6274	30	1	22.6274	30	0.333333	22.6274	30	0		22.6274	30	0.333333	22.6274	30	0	22.6274	30	0.333333
22.6274	20	0	22.6274	20	0.666667	22.6274	20	0		22.6274	20	1	22.6274	20	0	22.6274	20	0.333333
22.6274	10	0	22.6274	10	0.666667	22.6274	10	0		22.6274	10	0.333333	22.6274	10	0.333333	22.6274	10	0.333333
22.6274	0	0	22.6274	0	0.333333	22.6274	0	0		22.6274	0	0.333333	22.6274	0	0.333333	22.6274	0	0
25.3984	70	0.666667	25.3984	70	0.333333	25.3984	70	0		25.3984	70	3.66667	25.3984	70	2.33333	25.3984	70	3.33333
25.3984	60	0	25.3984	60	0.333333	25.3984	60	1		25.3984	60	3	25.3984	60	2	25.3984	60	3
25.3984	50	0.333333	25.3984	50	0.333333	25.3984	50	0.333333		25.3984	50	2.66667	25.3984	50	2.33333	25.3984	50	3.66667
25.3984	40	0	25.3984	40	0.333333	25.3984	40	0.666667		25.3984	40	0.333333	25.3984	40	0	25.3984	40	0
25.3984	30	0	25.3984	30	0	25.3984	30	0		25.3984	30	0.666667	25.3984	30	0	25.3984	30	0
25.3984	20	0	25.3984	20	0.333333	25.3984	20	0		25.3984	20	0.666667	25.3984	20	0	25.3984	20	0
25.3984	10	0	25.3984	10	0	25.3984	10	0		25.3984	10	0.666667	25.3984	10	1	25.3984	10	0
25.3984	0	0	25.3984	0	0.333333	25.3984	0	0		25.3984	0	0	25.3984	0	0	25.3984	0	0.333333
28.5088	70	0	28.5088	70	0.333333	28.5088	70	0		28.5088	70	4	28.5088	70	5	28.5088	70	5
28.5088	60	0	28.5088	60	0	28.5088	60	0		28.5088	60	4.33333	28.5088	60	1.66667	28.5088	60	4.66667
28.5088	50	0	28.5088	50	0	28.5088	50	0		28.5088	50	5.33333	28.5088	50	3.33333	28.5088	50	6
28.5088	40	0	28.5088	40	0.333333	28.5088	40	0		28.5088	40	3.33333	28.5088	40	3.33333	28.5088	40	3
28.5088	30	0	28.5088	30	0	28.5088	30	0		28.5088	30	4.33333	28.5088	30	0.333333	28.5088	30	3.33333
28.5088	20	0	28.5088	20	0	28.5088	20	0		28.5088	20	3	28.5088	20	0	28.5088	20	1.33333
28.5088	10	0	28.5088	10	0.666667	28.5088	10	0		28.5088	10	1	28.5088	10	0	28.5088	10	0
28.5088	0	0	28.5088	0	0	28.5088	0	0		28.5088	0	1	28.5088	0	0.666667	28.5088	0	1.33333
32	70	0.666667	32	70	0	32	70	0.333333		32	70	4	32	70	5	32	70	4.66667
32	60	0	32	60	0	32	60	0		32	60	5.66667	32	60	7	32	60	6.33333
32	50	0	32	50	0	32	50	0		32	50	6.33333	32	50	3.33333	32	50	6
32	40	0	32	40	0	32	40	0		32	40	6	32	40	3.33333	32	40	4.66667
32	30	0	32	30	0	32	30	0		32	30	2.66667	32	30	0	32	30	3.66667
32	20	0	32	20	0.666667	32	20	0		32	20	1.33333	32	20	2.33333	32	20	0
32	10	0	32	10	0	32	10	0		32	10	0	32	10	2	32	10	1
32	0	0	32	0	0	32	0	0		32	0	0	32	0	0	32	0	0
35.9188	70	0	35.9188	70	0	35.9188	70	0		35.9188	70	3.66667	35.9188	70	2	35.9188	70	3.66667
35.9188	60	0	35.9188	60	0	35.9188	60	0		35.9188	60	5.33333	35.9188	60	3.66667	35.9188	60	3.33333
35.9188	50	0	35.9188	50	0.333333	35.9188	50	0		35.9188	50	3.66667	35.9188	50	1.33333	35.9188	50	6
35.9188	40	0	35.9188	40	0	35.9188	40	0		35.9188	40	3.33333	35.9188	40	3.33333	35.9188	40	4.33333
35.9188	30	0	35.9188	30	0	35.9188	30	0		35.9188	30	4	35.9188	30	0	35.9188	30	0.333333
35.9188	20	0	35.9188	20	0	35.9188	20	0		35.9188	20	0.666667	35.9188	20	0.666667	35.9188	20	0.333333
35.9188	10	0	35.9188	10	0	35.9188	10	0.333333		35.9188	10	0.666667	35.9188	10	0	35.9188	10	0
35.9188	0	0	35.9188	0	0.666667	35.9188	0	0		35.9188	0	0	35.9188	0	0	35.9188	0	0
40.3175	70	0.666667	40.3175	70	0.666667	40.3175	70	0		40.3175	70	3	40.3175	70	1.33333	40.3175	70	4
40.3175	60	0.333333	40.3175	60	0	40.3175	60	0		40.3175	60	1.66667	40.3175	60	0	40.3175	60	2
40.3175	50	0	40.3175	50	0.333333	40.3175	50	0		40.3175	50	2.66667	40.3175	50	0	40.3175	50	2.66667
40.3175	40	0	40.3175	40	0.333333	40.3175	40	0		40.3175	40	1.66667	40.3175	40	0	40.3175	40	0.333333
40.3175	30	0	40.3175	30	0.666667	40.3175	30	0		40.3175	30	2	40.3175	30	0	40.3175	30	1
40.3175	20	0	40.3175	20	0	40.3175	20	0		40.3175	20	0.333333	40.3175	20	0.666667	40.3175	20	0
40.3175	10	0	40.3175	10	0.333333	40.3175	10	0		40.3175	10	0.333333	40.3175	10	0	40.3175	10	0
40.3175	0	0	40.3175	0	0	40.3175	0	0		40.3175	0	0	40.3175	0	0.666667	40.3175	0	0

## Sheet: Figure 2 rasters
Figure 2A																			Figure 2B
Control						Effect						Recovery							Control						Effect						Recovery
Sequence 1			Sequence 2			Sequence 1			Sequence 2			Sequence 1			Sequence 2				Sequence 1			Sequence 2			Sequence 1			Sequence 2			Sequence 1			Sequence 2
Trial #	Frequency (Hz)	Spike Time (ms)	Trial #	Frequency (Hz)	Spike Time (ms)	Trial #	Frequency (Hz)	Spike Time (ms)	Trial #	Frequency (Hz)	Spike Time (ms)	Trial #	Frequency (Hz)	Spike Time (ms)	Trial #	Frequency (Hz)	Spike Time (ms)		Trial #	Frequency (Hz)	Spike Time (ms)	Trial #	Frequency (Hz)	Spike Time (ms)	Trial #	Frequency (Hz)	Spike Time (ms)	Trial #	Frequency (Hz)	Spike Time (ms)	Trial #	Frequency (Hz)	Spike Time (ms)	Trial #	Frequency (Hz)	Spike Time (ms)
1	15200	24.02	1	21500	27.42	1	15200	16.28	1	21500	83.69	1	15200	24.61	1	21500	30.46		1	25300	11.73	1	35800	11.61	1	25300	11.92	1	35800	13.56	1	25300	12.48	1	35800	13
1	15200	27.42	1	21500	31.26	1	15200	30.02	16	15200	45.35	1	15200	29.79	1	21500	37.27		1	25300	15.59	1	35800	17.42	1	25300	51.8	1	35800	43.07	1	25300	16.59	1	35800	16.98
1	15200	30.05	1	21500	35.49	1	15200	44.11	34	21500	18.81	1	15200	32.69	1	21500	44.34		1	25300	18.75	1	35800	27.13	1	25300	68.77	1	35800	47.72	1	25300	112.46	1	35800	19.8
1	15200	34.46	1	21500	41.3	1	15200	49.45	42	21500	24.83	1	15200	36.52	2	21500	32.15		1	25300	21.41	1	35800	36.9	1	25300	77.91	1	35800	98.52	1	25300	117.43	1	35800	24.08
1	15200	41.13	1	21500	67.47	1	15200	57.72	43	21500	217.06	1	15200	40.31	2	21500	40.2		1	25300	33.58	1	35800	46.81	1	25300	121.67	1	35800	107.91	1	25300	142.15	1	35800	27.78
1	15200	43.92	2	21500	21.81	2	15200	28.96	44	21500	18.82	1	15200	50.82	3	21500	31.82		1	25300	38.68	1	35800	54.67	1	25300	134.07	6	35800	28.09	1	25300	144.78	1	35800	30.41
1	15200	46.91	2	21500	25.1	2	15200	33.41	45	21500	74.89	1	15200	54.95	3	21500	37.44		1	25300	63.25	1	35800	68.92	1	25300	234.34	12	35800	109.05	1	25300	161.99	1	35800	33.15
1	15200	50.77	3	21500	26.67	2	15200	58.2	53	15200	28.24	1	15200	57.69	3	21500	42.29		1	25300	70.93	1	35800	76.22	7	25300	74.62	12	35800	120.6	2	25300	30.86	1	35800	44.04
1	15200	53.49	3	21500	32.7	3	15200	36	62	21500	71.19	2	15200	26.26	5	21500	40.11		1	25300	120.14	1	35800	82.35	7	25300	80.3	12	35800	128.22	3	25300	64.51	1	35800	64.1
1	15200	61.48	4	21500	37.37	3	15200	50.83	71	21500	32.41	2	15200	32.79	9	21500	40.65		2	25300	12.46	1	35800	209.59	7	25300	88.87	12	35800	138.05	3	25300	90.51	1	35800	68.52
1	15200	66.12	4	21500	41.5	4	15200	29.65	76	21500	22.36	2	15200	40.78	9	21500	58.33		2	25300	21.27	2	35800	21.61	7	25300	99.96	20	25300	11.32	3	25300	98.75	1	35800	86.11
1	15200	71.9	4	21500	45.79	4	15200	153.39	89	15200	50.98	2	15200	47.56	14	15200	27.5		2	25300	77.41	2	35800	31.11	7	25300	189.02	20	25300	15.85	3	25300	110.95	1	35800	111.26
1	15200	76.49	4	21500	49.91	5	15200	39.61	89	15200	235.09	2	15200	50.91	14	15200	31.1		2	25300	85.81	2	35800	60.92	8	25300	78.22	20	25300	20.01	3	25300	116.91	2	35800	4.26
1	15200	79.45	6	21500	118.73	5	15200	45.44	90	21500	18.7	12	15200	205.95	14	15200	33.99		2	25300	96.71	2	35800	69.56	8	25300	140.76	20	25300	104.74	3	25300	160.48	2	35800	14.59
2	15200	20.16	9	21500	207.19	6	15200	25.58	91	21500	65.87	21	21500	20.15	14	15200	39.56		2	25300	103.26	3	35800	83.03	10	25300	149.89	20	25300	111.92	5	25300	26	2	35800	36.06
2	15200	24.46	14	15200	26.25	6	15200	29.46	94	21500	76.64	21	21500	25.88	14	15200	46.61		2	25300	135.74	3	35800	92.29	10	25300	156.66	20	25300	115.67	5	25300	32.4	2	35800	38.73
2	15200	29.71	14	15200	29.82	13	15200	100.33	95	21500	154.81	21	21500	31.17	14	15200	54.63		2	25300	155.17	4	35800	15.13	10	25300	167.09	20	25300	119.96	5	25300	63.84	2	35800	55.16
2	15200	40.61	14	15200	33.72	16	15200	28.44	98	21500	62.14	21	21500	35.05	15	21500	32.2		2	25300	231.43	4	35800	27.06	11	25300	230.64	20	25300	207.13	5	25300	71.72	2	35800	71.83
2	15200	47.74	14	15200	37.29	20	15200	48.57	99	15200	18.86	21	21500	37.82	15	21500	40.94		3	25300	1.37	5	35800	26.37	15	25300	107.83	20	25300	217.26	5	25300	77.38	2	35800	125.08
2	15200	124.44	28	15200	25.51	22	15200	28.41	106	21500	24.31	21	21500	47.07	18	15200	29.62		3	25300	22.03	5	35800	45.24	15	25300	130.82	21	35800	28.11	5	25300	82.92	3	35800	40.31
3	15200	25.73	28	15200	30.02	23	21500	92.82	109	21500	110.42	29	21500	27.45	18	15200	33.42		3	25300	134.9	5	35800	80.56	15	25300	164.02	21	35800	33.99	5	25300	86.5	3	35800	49.91
3	15200	28.91	28	15200	41.57	23	21500	205.11	111	21500	52.22	29	21500	33.73	18	15200	41.92		3	25300	167.02	5	35800	243.55	18	25300	84.03	21	35800	36.68	5	25300	92.99	3	35800	72.95
3	15200	34.91	28	15200	51.15	27	15200	26.58	128	21500	120.46	29	21500	38.36	18	15200	44.75		3	25300	185.16	6	35800	16.62	18	25300	90.31	21	35800	39.8	5	25300	105.04	3	35800	76.63
4	15200	22.76	29	21500	31.63	27	15200	45.26	132	21500	46.07	29	21500	44.16	19	21500	42.87		3	25300	222.11	6	35800	71.95	18	25300	109.14	21	35800	42.96	5	25300	109.69	3	35800	79.26
4	15200	26.66	29	21500	35.48	29	15200	44.36	132	21500	72.59	30	15200	40.17	32	15200	27.08		3	25300	248.35	6	35800	113.19	22	25300	84.62	21	35800	45.69	6	25300	240.84	3	35800	87.56
4	15200	31.18	29	21500	39.2	30	15200	21.58	132	21500	98.99	34	21500	26.1	32	15200	31.6		4	25300	9.03	6	35800	135.79	25	25300	65.06	21	35800	48.32	7	25300	2.81	3	35800	98.21
5	15200	26.63	29	21500	43.71	31	15200	42.02	135	21500	34.1	34	21500	30.1	32	15200	36.59		4	25300	13.19	6	35800	164.51	25	25300	84.23	21	35800	51.2	7	25300	15.41	3	35800	104.3
5	15200	39.04	29	21500	50.47	33	15200	31.44	136	21500	25.3	34	21500	34.91	32	15200	41.75		4	25300	19.12	6	35800	185.85	25	25300	101.87	21	35800	85.35	7	25300	20.18	3	35800	113.82
6	15200	28	35	15200	27	34	15200	56.13	140	15200	7.75	34	21500	39.97	32	15200	44.39		4	25300	145.4	6	35800	207.18	27	25300	16.36	21	35800	108.23	7	25300	49.91	3	35800	121.16
7	15200	39.77	35	15200	33.71	34	15200	63.14	140	15200	30.42	34	21500	42.9	32	15200	52.19		4	25300	163.71	7	35800	203.82	29	25300	64.53	21	35800	110.88	7	25300	64.72	3	35800	142.09
10	15200	149.86	44	15200	28.96	35	15200	170.24	140	15200	141.91	34	21500	50.02	32	15200	56.07		4	25300	192.46	7	35800	227.25	29	25300	94.45	21	35800	113.74	8	25300	72.25	5	35800	113.25
17	21500	24.49	55	15200	26.01	36	15200	3.43	172	21500	144.88	43	21500	28.4	33	21500	30.2		4	25300	208.96	8	35800	22.49	29	25300	138.4	21	35800	116.87	8	25300	80.11	6	35800	75.39
17	21500	27.92	55	15200	30.66	36	15200	50.27	172	21500	163.65	43	21500	33.5	33	21500	35.79		4	25300	240.18	8	35800	249.89	29	25300	182.36	21	35800	119.62	8	25300	82.85	7	35800	33.96
17	21500	63.01	65	15200	25.21	38	15200	153.07	175	21500	27.39	43	21500	37.66	33	21500	39.5		5	25300	9.99	9	35800	39.02	33	35800	17.36	21	35800	124.67	8	25300	86.63	7	35800	36.61
18	15200	53.93	65	15200	30.75	38	15200	196.95	187	21500	66.86	43	21500	40.29	33	21500	44.01		5	25300	159.74	9	35800	232.39	33	35800	37.28	21	35800	153.89	8	25300	89.44	10	35800	15.01
26	21500	25.6	76	15200	28.42	40	15200	9.26	187	21500	170.76	43	21500	49.28	33	21500	47.9		5	25300	192.45	10	35800	133.15	33	35800	41.61	21	35800	177.87	8	25300	92.46	10	35800	18.09
26	21500	30.31	76	15200	31.75	42	15200	44.81	188	21500	21	43	21500	80.17	33	21500	52.28		5	25300	230.91	10	35800	147.4	33	35800	64.83	21	35800	181.38	8	25300	95.09	10	35800	26.93
26	21500	36.04	81	15200	32.41	42	15200	54.67	188	21500	181.06	45	15200	57.83	35	21500	32.18		6	25300	129.6	10	35800	176.25	33	35800	125.77	21	35800	184.34	8	25300	105.23	10	35800	29.56
27	15200	25.7	95	15200	29.71	42	15200	83.1	191	15200	30.24	48	21500	28.22	35	21500	43.52		6	25300	146.29	10	35800	187.9	34	25300	85.13	21	35800	186.97	8	25300	120.59	10	35800	34.46
32	21500	29.95	100	15200	26.03	44	21500	19.81	197	21500	31.57	48	21500	34.63	37	21500	29.49		6	25300	154.76	11	35800	195.46	34	25300	93.33	21	35800	192.74	8	25300	127.4	10	35800	37.95
32	21500	36.01	123	15200	36.55	45	15200	30.57	200	15200	28.03	48	21500	40.65	37	21500	34.33		6	25300	168.71	11	35800	205.31	34	25300	100.78	22	35800	33.47	8	25300	131.98	10	35800	43.79
32	21500	43.25	123	15200	40.63	47	15200	98.44	203	21500	88.04	48	21500	48.27	57	15200	25.49		6	25300	178.29	11	35800	245.05	34	25300	120.35	22	35800	43.21	8	25300	139.04	10	35800	46.79
38	21500	29.97	148	15200	26.61	50	15200	137.78	203	21500	120.98	52	21500	29.29	57	15200	32.71		6	25300	188.42	11	35800	249.77	37	35800	23.15	22	35800	45.91	8	25300	146.43	10	35800	49.47
38	21500	38.6	148	15200	30.91	50	15200	203.95	205	21500	32.69	52	21500	35.68	57	15200	36		6	25300	225.55	12	35800	30.92	37	35800	27.45	31	35800	65.78	8	25300	152.72	10	35800	62.96
48	21500	29.94	148	15200	35.87	53	15200	91.06	205	21500	86.4	52	21500	39.5	57	15200	40.95		6	25300	237.21	12	35800	38.67	37	35800	31.65	40	35800	201.92	8	25300	209.99	10	35800	66.57
48	21500	37.91	148	15200	44.62	56	15200	58.41	212	21500	47.43	72	21500	26.2	57	15200	49.16		6	25300	241.91	12	35800	68.05	37	35800	34.87	40	35800	217.81	12	25300	103.94	10	35800	70.76
55	21500	26.54	156	15200	28.2	57	15200	22.18	214	21500	57.42	72	21500	29.67	57	15200	60.47		7	25300	23.81	13	35800	151.02	37	35800	57.16	43	25300	11.59	12	25300	134.85	10	35800	89.14
55	21500	30.62	156	15200	32.64	58	21500	33.26	214	21500	86.87	72	21500	34.36	57	15200	82.73		7	25300	51.16	13	35800	158.8	37	35800	60.95	48	35800	160.08	13	25300	20	10	35800	101.53
55	21500	35.76	160	15200	34.25	58	21500	39.64	215	15200	29.27	72	21500	38.66	58	21500	36.47		7	25300	134.15	13	35800	203.59	37	35800	88.73	56	25300	11.16	13	25300	35.76	10	35800	114.13
62	21500	26.07	167	15200	27.52	59	15200	52.01	218	21500	0.29	91	21500	18.45	58	21500	42.19		7	25300	138.13	14	35800	41.49	38	25300	249.61	57	35800	26.88	13	25300	51.6	10	35800	116.86
62	21500	32.55	167	15200	31.53	64	15200	87.17	221	21500	79.7	91	21500	23.08	61	15200	28.29		8	25300	105.42	15	25300	11.07	42	25300	49.82	57	35800	33.35	13	25300	75.48	10	35800	122.19
62	21500	40.76	167	15200	34.87	64	15200	98.48	221	21500	160.56	91	21500	28.35	61	15200	35.25		8	25300	171.04	15	25300	24.66	42	25300	63.54	57	35800	102.17	14	25300	122.41	12	35800	23.17
63	15200	69.13	167	15200	47.37	68	15200	111.91	228	21500	100.58	91	21500	31.39	61	15200	38.18		8	25300	209.59	15	25300	77.66	42	25300	93.87	57	35800	105.02	14	25300	127.55	12	35800	66.37
66	21500	29.1	172	15200	25.7	68	15200	177.64	228	21500	120.76	91	21500	42.45	61	15200	47.64		8	25300	230.08	15	25300	88.81	47	25300	151	57	35800	205.07	14	25300	138.4	12	35800	185
66	21500	33.67	172	15200	29.88	68	15200	217.22	228	21500	147.63	98	15200	76.02	62	21500	42.57		9	25300	11.72	15	25300	97.49	47	25300	158.52	57	35800	247.47	14	25300	142.21	15	35800	93.48
66	21500	39.21	179	21500	241.45	69	15200	36.79	228	21500	249.03	110	21500	23.31	68	21500	29.46		9	25300	17.08	15	25300	103.46	47	25300	164.2	58	35800	24.27	14	25300	145.02	15	35800	96.63
82	21500	27.1	186	15200	29.47	69	15200	44.28	231	21500	27.23	110	21500	28.2	71	15200	40.43		9	25300	55.06	16	35800	96.69	47	25300	202.58	58	35800	49.93	14	25300	158.07	15	35800	102.84
82	21500	33.78	200	15200	25.36	69	15200	96.29	231	21500	54.73	110	21500	43.93	72	21500	45.41		9	25300	208.74	17	35800	14.45	47	25300	210.2	58	35800	54.7	14	25300	167.31	15	35800	106.29
82	21500	39.91	200	15200	29.56	71	15200	25.97	235	15200	34.7	115	21500	29.69	82	15200	24.59		10	25300	6.63	17	35800	24.84	47	25300	216.9	58	35800	64.85	14	25300	173.68	15	35800	110.39
86	21500	27.58	200	15200	32.41	71	15200	32.02	247	21500	94.64	115	21500	40.6	82	15200	28.26		10	25300	127.29	17	35800	130.79	49	35800	30.1	58	35800	78.3	14	25300	180.61	15	35800	120.73
86	21500	31.66	200	15200	35.6	72	15200	90.62	251	15200	20.17	115	21500	44.47	82	15200	30.89		10	25300	162.07	17	35800	195.05	49	35800	34.42	58	35800	81.37	14	25300	188.34	15	35800	152.67
86	21500	40.37	200	15200	48	73	15200	40.77	251	15200	32.18	115	21500	51.69	82	15200	37.59		10	25300	189.46	17	35800	206.58	49	35800	45.72	58	35800	99.39	14	25300	210.59	15	35800	155.89
86	21500	49.62	221	15200	27.57	73	15200	98.12	254	21500	112.19	141	15200	75.33	89	15200	33.46		10	25300	206.87	17	35800	212.59	49	35800	50.13	58	35800	148.24	14	25300	214.31	15	35800	158.71
86	21500	76.16	221	15200	30.2	73	15200	160.36	254	21500	192.25	142	21500	34.78	89	15200	46.1		10	25300	245.55	17	35800	225.48	49	35800	194.06	61	25300	11.57	15	25300	9.05	15	35800	163.57
110	21500	23.81	221	15200	39.23	77	15200	49.27	255	21500	1.09	142	21500	40.27	89	15200	51.02		11	25300	6.87	18	35800	23.27	50	25300	245.66	61	25300	22.48	15	25300	29.56	15	35800	167.33
110	21500	27.67	232	15200	28.25	79	15200	85.47	256	21500	29.98	142	21500	50.38	90	21500	60.67		11	25300	23.18	18	35800	31.82	51	25300	70.32	64	35800	202.82	15	25300	32.75	15	35800	199.12
110	21500	31.55	232	15200	32.72	81	15200	56.13	258	21500	210.06	148	21500	25.74	96	21500	34.42		11	25300	106.9	18	35800	247.54	51	25300	82.05	64	35800	243.63	16	25300	188.03	15	35800	213.43
110	21500	43.85	232	15200	35.36	81	15200	67.13	260	21500	92.6	148	21500	28.94	98	15200	30.94		11	25300	121.99	19	35800	56.35	56	35800	20.91	71	25300	11.89	17	25300	13.46	16	35800	42.63
115	21500	28.18	232	15200	44.67	82	21500	27.59	270	21500	175.34	148	21500	31.57	98	15200	42.97		11	25300	144.87	19	35800	95.4	56	35800	25.89	83	25300	11.97	17	25300	59.14	18	35800	189.16
115	21500	34.83	244	21500	33.03	83	15200	37.93	270	21500	226.5	148	21500	35.27	98	15200	60.52		12	25300	17.95	19	35800	99.64	56	35800	41.14	83	25300	23.2	17	25300	64.35	22	35800	169.46
115	21500	43.08	244	21500	194.97	84	15200	202.16	271	21500	29.29	148	21500	42.06	99	21500	26.5		12	25300	119.98	19	35800	106.39	56	35800	58.92	89	25300	12.03	17	25300	70.89	22	35800	179.69
123	21500	26.76	247	15200	26.96	85	15200	157.8	272	21500	20	150	15200	92.92	99	21500	38.73		12	25300	127.06	19	35800	130.25	56	35800	64.87	92	35800	222.08	17	25300	88.73	22	35800	182.67
123	21500	30.81	247	15200	31.14	86	15200	40.83	272	21500	178.97	154	21500	27.9	99	21500	47.12		12	25300	130.9	19	35800	162.53	56	35800	84.89	96	35800	57.6	18	35800	29.26	22	35800	188.24
123	21500	36.47	247	15200	39.42	89	21500	29.22	279	21500	117.1	154	21500	35.38	99	21500	57.8		12	25300	240.56	20	25300	0.85	62	25300	161.64	96	35800	73.58	18	35800	36.97	22	35800	193.45
123	21500	44.21	257	15200	25.47	89	21500	173.88	279	21500	133.8	154	21500	38.4	102	15200	32.01		13	25300	21.5	20	25300	11.67	62	25300	170.88	101	35800	188.25	18	35800	40.61	22	35800	215.33
127	21500	28.03	257	15200	28.28	90	15200	142.3	279	21500	174.8	154	21500	44.33	106	21500	85.85		13	25300	68.01	20	25300	20.62	62	25300	190.69	102	35800	178.7	18	35800	49.19	23	35800	153.67
127	21500	33.62	257	15200	41.5	91	15200	110.82	289	21500	88.95	160	21500	28.43	111	21500	36		13	25300	102.69	20	25300	29.51	62	25300	208.29	102	35800	214.52	18	35800	68.89	23	35800	156.9
127	21500	37.88	257	15200	55.54	93	21500	28.64	289	21500	105.12	160	21500	32.98	122	15200	25.91		13	25300	107.52	20	25300	179.02	62	25300	213.91	103	35800	169.26	18	35800	72.35	23	35800	159.53
127	21500	44.26	267	15200	29.56	95	15200	59.73	289	21500	122.75	160	21500	38.28	122	15200	30.3		13	25300	119.55	21	35800	154.76	63	35800	15.31	103	35800	172.63	18	35800	75.28	23	35800	162.2
133	21500	27.14	267	15200	34.48	97	21500	36.48	289	21500	218.88	160	21500	46.15	122	15200	32.93		13	25300	128.92	21	35800	179.5	63	35800	21.15	103	35800	179.34	18	35800	80.75	23	35800	164.9
133	21500	36.03	267	15200	43.05	105	15200	57.23	295	21500	62.73	160	21500	49.92	122	15200	36.7		13	25300	146.76	21	35800	186.09	64	25300	81.05	103	35800	182.73	18	35800	86.79	23	35800	168.07
133	21500	42.2	269	21500	21.24	105	15200	94.88	295	21500	78.44	167	21500	30.07	122	15200	41.15		13	25300	155.37	21	35800	213.58	64	25300	109.54	103	35800	186.44	18	35800	97.36	23	35800	174.8
137	21500	28.35	276	15200	27.46	105	15200	118.45	298	21500	49.43	167	21500	36.03	122	15200	51.65		13	25300	169.41	22	35800	25.94	64	25300	120.89	103	35800	196.17	18	35800	100.24	23	35800	179.44
137	21500	34.49	276	15200	32.96	105	15200	171.57	298	21500	124.38	167	21500	41.62	124	21500	43.25		13	25300	172.55	22	35800	40.72	64	25300	125.58	103	35800	201.45	21	25300	73.78	23	35800	182.71
137	21500	43.02	276	15200	36.88	105	15200	218.83	315	21500	54.74	167	21500	67.46	126	15200	34.65		13	25300	209.99	23	35800	71.56	64	25300	140.16	103	35800	204.08	21	25300	81.71	23	35800	187.94
145	21500	24.71	280	15200	24.88	106	15200	74.74	315	21500	73.62	171	21500	34.26	126	15200	38.88		14	35800	18.04	23	35800	107.91	69	35800	31.43	104	35800	18.77	21	25300	85.75	23	35800	193.54
145	21500	28.82	280	15200	30.33	108	15200	123.8	315	21500	91.68	171	21500	39.68	127	21500	40.39		14	35800	37.81	23	35800	121.58	69	35800	37.74	104	35800	21.79	21	25300	90.34	23	35800	196.52
145	21500	33.39	280	15200	45.37	110	15200	62.52	316	21500	7.54	171	21500	44.73	127	21500	49.61		14	35800	41.34	23	35800	217.86	69	35800	48.08	104	35800	28.23	21	25300	105.99	23	35800	208.34
154	21500	26.93	295	15200	23.71	112	21500	29.16	317	21500	15.55	177	21500	28.72	128	21500	40.29		14	35800	52	23	35800	248.69	69	35800	54.48	104	35800	98.6	21	25300	115.55	23	35800	241.74
154	21500	31.77	295	15200	26.85	112	21500	39.91	318	21500	21.49	177	21500	39.36	140	15200	25.99		14	35800	61.04	24	35800	13.26	69	35800	61.93	104	35800	101.84	23	25300	65.49	24	35800	36.76
154	21500	39.13	295	15200	30	112	21500	217.16	323	21500	83.77	177	21500	49.4	140	15200	30.01		14	35800	121.34	24	35800	18.97	69	35800	86.88	104	35800	105.14	23	25300	72.32	24	35800	44.69
154	21500	46.12	295	15200	49.56	114	15200	103.38	323	21500	112.73	180	15200	18.37	140	15200	33.34		14	35800	144.77	24	35800	25.86	70	25300	181.81	104	35800	111.92	23	25300	80.43	24	35800	51.82
164	21500	25.7	300	15200	28.91	115	15200	56.56	323	21500	135.45	187	21500	25.33	140	15200	37.86		14	35800	180.06	24	35800	30.98	70	25300	206.1	104	35800	124	23	25300	99.33	24	35800	61.77
164	21500	29.48	300	15200	36.62	117	15200	33.15	323	21500	163.44	187	21500	29.73	140	15200	41.87		15	25300	114.95	24	35800	76.21	70	25300	245	104	35800	168.43	23	25300	112.97	24	35800	67.21
164	21500	32.26	318	15200	32.39	120	15200	93.79	323	21500	188.77	187	21500	35.07	140	15200	47.23		15	25300	176.93	24	35800	90.09	71	25300	63.41	104	35800	173.27	23	25300	137.09	24	35800	70.53
171	21500	24.29	318	15200	37.14	123	21500	21.97	324	15200	0.08	187	21500	38.25	140	15200	53.26		15	25300	187.49	24	35800	180.34	78	35800	13.43	104	35800	178.9	27	25300	160.18	24	35800	81.07
171	21500	28.53	318	15200	46.87	123	21500	25.26	324	15200	17	217	21500	25.03	153	15200	26.23		15	25300	197.33	25	35800	20.11	78	35800	18.23	104	35800	181.97	28	35800	13.07	24	35800	83.93
171	21500	31.45	318	15200	54.41	124	15200	28.72	326	21500	22.02	217	21500	29.15	153	15200	30.01		16	25300	2.9	25	35800	36.24	78	35800	29.55	104	35800	234.37	28	35800	15.71	24	35800	91.31
171	21500	41.02	325	15200	26.08	125	15200	35.13	328	15200	142.16	217	21500	35.15	153	15200	32.64		16	25300	30.15	25	35800	154.38	78	35800	41.11	104	35800	239.17	28	35800	18.7	24	35800	98.81
177	21500	28.66	325	15200	32.04	126	15200	35.01	328	15200	216.7	217	21500	45.6	153	15200	37.29		16	25300	120.69	25	35800	183.75	78	35800	46.18	104	35800	241.81	28	35800	21.37	25	35800	75.25
177	21500	32.41	325	15200	40.05	128	15200	55.88	334	21500	159.45	221	21500	24.35	153	15200	40.56		16	25300	163.76	25	35800	199.88	78	35800	90.64	104	35800	244.44	28	35800	24.99	25	35800	78.17
177	21500	37.09	336	15200	28.91	128	15200	75.1	334	21500	182.49	221	21500	28.87	171	15200	31.75		16	25300	224.95	25	35800	224.44	78	35800	104.82	105	35800	0.52	28	35800	27.63	25	35800	82.11
186	21500	26.04	336	15200	34.64	128	15200	146.34	335	21500	194	221	21500	33.36	171	15200	35.43		16	25300	237.44	26	35800	30.17	82	35800	15.76	105	35800	68.02	28	35800	30.98	25	35800	88.01
186	21500	29.74	336	15200	40.86	130	15200	64.5	348	15200	29.87	221	21500	39.73	171	15200	38.69		17	25300	20.05	26	35800	40.06	82	35800	26.89	108	25300	11.23	28	35800	39.06	25	35800	95.61
186	21500	34.02	346	15200	24.91	130	15200	126.95	348	15200	66.14	221	21500	44.52	171	15200	42.03		17	25300	73.17	26	35800	76.66	82	35800	33.08	108	25300	15.44	28	35800	42.25	25	35800	151.54
190	21500	29.25	346	15200	27.75	131	15200	98.93	348	15200	152.55	223	15200	178.21	171	15200	44.94		17	25300	87.92	27	35800	4.44	82	35800	36.41	108	25300	18.53	28	35800	51.08	25	35800	160.58
190	21500	33.61	346	15200	33.66	131	15200	121	349	21500	25.79	229	21500	29.41	171	15200	56.3		17	25300	109.72	27	35800	54.27	82	35800	41.73	108	25300	23.49	28	35800	58.7	25	35800	167.1
196	15200	14.83	346	15200	40.86	132	15200	11.86	349	21500	223.91	229	21500	36.15	171	15200	63.13		17	25300	117.49	27	35800	181.12	85	25300	21.17	109	35800	78.19	28	35800	61.62	25	35800	174.44
210	21500	28.91	356	15200	25.99	132	15200	60.55	352	21500	29.94	229	21500	39.06	172	21500	27.64		17	25300	148.1	27	35800	203.1	85	25300	31.62	109	35800	80.94	28	35800	80	25	35800	178.88
210	21500	33.82	356	15200	32.13	133	15200	81.3	352	21500	81.78	229	21500	42.09	172	21500	35.32		17	25300	153.77	28	35800	1.91	85	25300	47.98	109	35800	88.27	28	35800	136.61	25	35800	186.44
210	21500	41.45	356	15200	53.03	133	15200	107.76	357	21500	9.77	239	21500	31.1	172	21500	41.14		17	25300	157.93	28	35800	73.56	85	25300	54.28	109	35800	163.5	29	25300	56.45	25	35800	194.76
210	21500	63.94	365	15200	26.93	134	15200	172.18	366	15200	27.55	239	21500	36.81	173	21500	43.91		18	25300	32.94	28	35800	112.89	85	25300	65.48	118	25300	17.63	29	25300	64.55	25	35800	197.67
214	21500	29.59	365	15200	29.86	136	15200	16.23	369	21500	151.69	239	21500	47.48	183	15200	12.61		18	25300	44.03	28	35800	131.45	85	25300	75.88	118	25300	22.64	29	25300	67.57	25	35800	232.6
214	21500	35.51	365	15200	33.69	141	21500	17.49	373	15200	12.4	249	21500	27.74	183	15200	18.47		18	25300	142.67	28	35800	143.46	85	25300	100.73	128	25300	12.03	29	25300	70.93	26	25300	11.87
214	21500	40.65	365	15200	40.28	141	21500	26.26	377	21500	224.35	249	21500	30.64	183	15200	26.53		18	25300	154.14	28	35800	149.33	85	25300	109.9	128	25300	16.36	29	25300	77.8	26	25300	17.11
232	21500	26.34	365	15200	44.73	141	21500	33.03	382	21500	55.93	249	21500	34.1	183	15200	29.4		18	25300	180.92	28	35800	157.3	91	35800	34.81	133	25300	12.03	29	25300	81.65	26	25300	31.16
232	21500	31.16	365	15200	48.19	141	21500	237.66	386	15200	37.3	249	21500	37.48	183	15200	33.36		18	25300	202.03	28	35800	160.98	91	35800	40.09	133	25300	90.75	29	25300	90.03	26	25300	87.53
232	21500	36.11	375	15200	24.42	142	15200	85.87	386	15200	112.63	249	21500	41.25	183	15200	37.98		18	25300	219.26	28	35800	168.49	91	35800	44.04	133	25300	104.69	29	25300	98.78	26	25300	91.76
244	21500	23.69	375	15200	35.16	147	15200	111.67	387	21500	21.2	249	21500	45.67	183	15200	46.64		18	25300	231.2	28	35800	172.44	91	35800	46.69	134	35800	158.98	29	25300	107.62	26	25300	101.83
244	21500	27.67	375	15200	40.34	148	21500	20.21	387	21500	168.43	249	21500	50.09	183	15200	51.17		18	25300	239.47	28	35800	177.05	91	35800	57.12	134	35800	163.25	29	25300	124.64	26	25300	111.37
251	21500	26.28	382	21500	147.58	149	15200	37.81	393	21500	68.16	249	21500	56.46	183	15200	59.9		19	35800	16.45	28	35800	180.34	91	35800	65.51	134	35800	166.39	29	25300	147.98	26	25300	120.66
251	21500	31.83	383	15200	30.45	152	15200	48.15	393	21500	190.5	255	21500	25.67	183	15200	66.89		19	35800	22.86	28	35800	192.32	91	35800	72.53	134	35800	169.59	32	25300	82.26	26	25300	129.39
251	21500	37.32	383	15200	39.13	154	21500	32.79	400	15200	28.84	255	21500	29.7	183	15200	69.73		19	35800	50.4	28	35800	198.63	91	35800	78.99	134	35800	172.66	35	25300	100.93	27	35800	18.74
251	21500	44.53	383	15200	45.92	154	21500	46.31				255	21500	37.09	194	15200	28.46		19	35800	79.04	28	35800	205.95	91	35800	96.5	134	35800	237.98	36	25300	71.51	27	35800	23.03
260	21500	28.01	391	15200	26.96	157	15200	98.47				255	21500	41.36	194	15200	36.46		19	35800	84.8	28	35800	249.66	91	35800	109.14	134	35800	240.61	37	25300	61.56	27	35800	29.84
260	21500	31.65	391	15200	31.44	158	15200	136.74				271	21500	27.21	194	15200	44.97		19	35800	92.68	29	35800	218.04	91	35800	122.77	134	35800	243.81	37	25300	64.64	27	35800	38.24
260	21500	35.28	391	15200	35.38	161	15200	61.45				271	21500	33.53	194	15200	52.2		19	35800	168.68	30	35800	85.16	94	25300	211.34	134	35800	246.45	37	25300	72.1	28	35800	128.51
275	21500	24.49	391	15200	50.75	162	15200	68.58				271	21500	36.81	204	15200	33.1		19	35800	208.48	30	35800	110.04	94	25300	225.79	134	35800	249.29	37	25300	75.24	28	35800	138.35
275	21500	29.34	396	15200	28.39	162	15200	142.07				271	21500	43.03	204	15200	48.62		19	35800	245.85	30	35800	123.08	94	25300	236.61	135	35800	5.3	37	25300	83.41	28	35800	146.6
275	21500	33.44	396	15200	36.13	163	15200	247.72				277	15200	73.68	211	15200	28.19		20	25300	180.16	30	35800	131.59	94	25300	247.81	135	35800	7.94	37	25300	91.38	28	35800	150.71
275	21500	39.24				166	15200	36.81				283	21500	29.17	211	15200	31.82		20	25300	190.81	30	35800	144.3	95	25300	2.22	135	35800	109.73	37	25300	98.77	28	35800	156.92
284	15200	120.99				170	15200	22.38				283	21500	31.95	211	15200	34.94		20	25300	198.63	30	35800	149.4	95	25300	9.95	135	35800	121.21	37	25300	101.76	28	35800	172.1
285	21500	24.97				170	15200	30.51				283	21500	43.3	211	15200	38.02		20	25300	206.62	31	35800	180.83	95	25300	38.33	135	35800	124.68	37	25300	105.15	31	35800	171.09
285	21500	30.29				172	15200	63.75				283	21500	54.41	211	15200	40.7		21	25300	196.26	31	35800	190.68	95	25300	63.3	135	35800	165.47	37	25300	111.27	31	35800	184.26
285	21500	35.18				175	15200	53.7				291	15200	122.97	211	15200	45.58		21	25300	208.55	31	35800	203.62	95	25300	154.51	135	35800	172.96	37	25300	123.07	32	35800	104.96
294	21500	25.49				175	15200	73.5				303	21500	25.39	215	15200	35.17		21	25300	231.95	32	35800	14.34	106	25300	107.82	135	35800	179.01	39	25300	75.16	32	35800	107.88
294	21500	30.28				175	15200	92.16				303	21500	29.76	215	15200	39.33		21	25300	248.21	32	35800	118.62	106	25300	116.6	135	35800	182.02	39	25300	85.03	32	35800	111.91
294	21500	35.5				177	15200	71.71				303	21500	33.55	226	15200	26.48		22	25300	26.17	32	35800	149.32	106	25300	128.28	135	35800	184.99	39	25300	89.05	32	35800	115.15
294	21500	41.52				177	15200	90.64				303	21500	36.28	226	15200	31.36		22	25300	140.32	32	35800	164.87	106	25300	132.14	135	35800	187.63	39	25300	98.45	32	35800	118.97
304	21500	29.98				178	15200	106.91				303	21500	39.87	226	15200	35.81		22	25300	162.51	32	35800	179.47	106	25300	161.07	135	35800	225.19	39	25300	104.78	32	35800	123.95
304	21500	34.13				179	15200	211.44				307	21500	31.86	233	15200	29.63		22	25300	174.21	32	35800	249.38	106	25300	175.91	135	35800	227.82	39	25300	110.96	32	35800	129.06
304	21500	39.29				182	15200	79.13				307	21500	39.5	233	15200	32.73		22	25300	184.93	33	35800	39.53	106	25300	206.52	135	35800	230.45	39	25300	125.61	32	35800	134.43
304	21500	59.52				184	15200	43.86				307	21500	45.25	233	15200	37.6		22	25300	206.47	33	35800	233.57	109	25300	59.72	135	35800	234.86	39	25300	133.94	32	35800	138.21
308	21500	26.36				184	15200	67.98				312	21500	30.79	233	15200	48.64		22	25300	239.52	34	25300	12.02	109	25300	64.87	136	35800	51.24	39	25300	164.01	32	35800	141.46
308	21500	29.46				185	15200	28.82				312	21500	41.06	240	15200	30.15		23	35800	24.54	34	25300	20.65	109	25300	84.46	136	35800	53.87	43	25300	230.73	32	35800	155.5
308	21500	35.61				187	21500	33.2				322	21500	33.93	240	15200	33.43		23	35800	40.99	34	25300	66.63	109	25300	89.23	136	35800	56.61	44	25300	25.4	32	35800	158.59
333	21500	25.13				190	15200	208.17				322	21500	40.22	240	15200	45.41		23	35800	249.9	35	35800	37.53	109	25300	133.46	136	35800	59.67	44	25300	33.24	32	35800	161.98
333	21500	29.07				196	15200	225.01				322	21500	51.51	240	15200	50.27		24	25300	17.49	35	35800	51.98	110	35800	47.18	136	35800	71.18	44	25300	37.84	32	35800	167.02
333	21500	33.55				202	15200	92				325	15200	238.93	250	15200	26.95		24	25300	46.72	35	35800	222.48	110	35800	74.04	136	35800	110.32	44	25300	62.89	32	35800	181.65
333	21500	41.59				202	15200	108.72				330	21500	28.08	250	15200	34.18		24	25300	74.68	36	35800	16.27	112	25300	96.86	136	35800	114.12	44	25300	81.47	32	35800	189.62
360	21500	27.66				202	15200	189.15				330	21500	35.17	250	15200	37.28		24	25300	171.59	36	35800	26.61	112	25300	230.66	136	35800	117.5	44	25300	88.27	32	35800	196.02
360	21500	32.3				203	15200	38.81				330	21500	39.56	250	15200	40.45		24	25300	178.05	36	35800	192.33	112	25300	236.21	152	35800	199.37	44	25300	91.68	34	25300	11.89
360	21500	37.16				210	21500	44.7				330	21500	49.25	260	15200	28.62		24	25300	203.05	37	35800	146.96	112	25300	246.1	154	25300	12.84	44	25300	106.59	34	25300	15.64
366	21500	29.64				211	15200	16.46				338	21500	27.2	260	15200	34.74		24	25300	230.81	37	35800	245.78	113	25300	17.67	154	25300	86.86	44	25300	120.2	34	25300	20.9
366	21500	35.51				211	15200	196.29				338	21500	31.43	260	15200	42.8		24	25300	246.3	38	35800	21.31	113	25300	45.92	154	25300	138.88	44	25300	132.87	34	25300	107.54
366	21500	40.8				213	15200	62.28				338	21500	37.73	260	15200	46.09		25	25300	10.13	38	35800	194.25	113	25300	73.72	164	35800	144.79	44	25300	138.53	34	25300	110.93
372	21500	28.58				217	15200	115.85				338	21500	47.28	260	15200	51.29		25	25300	26.16	38	35800	212.05	113	25300	97.55	166	35800	23.42	45	25300	100.42	34	25300	116.91
372	21500	35.67				218	15200	190.39				344	21500	28.96	260	15200	58.36		25	25300	58.78	38	35800	220.34	124	25300	236.28	166	35800	34.24	45	25300	111.35	34	25300	132.52
372	21500	51.25				219	15200	36.96				344	21500	34.65	261	21500	19.86		25	25300	225.9	38	35800	224.82	128	25300	198.98	166	35800	95.22	45	25300	120.77	34	25300	235.34
377	21500	26.94				219	15200	56.62				344	21500	40.25	268	15200	28.48		25	25300	236.5	38	35800	230.79	128	25300	216.82	166	35800	103.75	46	25300	128.56	38	35800	51.11
377	21500	31.12				222	15200	81.52				358	21500	28.01	268	15200	31.43		26	25300	4.5	38	35800	237.66	130	25300	30.08	166	35800	107.16	46	25300	140.52	38	35800	156.13
377	21500	45.52				226	15200	66.5				358	21500	31.75	268	15200	34.9		26	25300	17.73	38	35800	247.15	130	25300	78.61	166	35800	110.69	46	25300	143.15	38	35800	168.89
390	21500	32.59				226	15200	210.2				358	21500	34.66	268	15200	38.25		26	25300	44.59	39	35800	234.07	130	25300	84.34	166	35800	113.56	46	25300	148.47	38	35800	183.25
390	21500	39.1				227	21500	19.73				358	21500	39.25	268	15200	46.78		26	25300	97.32	39	35800	237.93	135	35800	41.4	166	35800	188.88	46	25300	154.68	38	35800	205.77
398	15200	210.17				227	21500	52.65				358	21500	64.88	272	15200	28.8		26	25300	126.54	39	35800	242.24	135	35800	44.03	166	35800	195.81	46	25300	158.43	42	25300	12.07
						227	21500	139.03				367	21500	28.52	272	15200	34.77		26	25300	169.9	39	35800	246.03	135	35800	55.96	167	35800	6.65	46	25300	164.08	42	25300	16.09
						235	15200	78.31				367	21500	33.19	277	15200	29.68		26	25300	242.29	40	35800	1.01	135	35800	80.16	167	35800	9.5	51	25300	80.37	42	25300	21.52
						238	15200	23.07				367	21500	38.54	277	15200	38.61		27	25300	12.18	40	35800	5.23	135	35800	117.23	167	35800	12.13	51	25300	101.95	42	25300	28.37
						246	21500	28.93				367	21500	42.65	278	21500	32.65		27	25300	23.72	40	35800	15.69	140	25300	230.92	167	35800	74.74	51	25300	112.46	42	25300	34.38
						246	21500	32.78				367	21500	47.67	285	15200	25.56		27	25300	150.23	40	35800	18.88	141	25300	31.66	167	35800	79.37	51	25300	119.48	42	25300	117.32
						251	15200	51.23				373	21500	28.66	285	15200	32.66		27	25300	164.02	40	35800	30.96	141	25300	51.24	167	35800	131.56	51	25300	149.18	42	25300	120.05
						251	15200	71.76				373	21500	33.21	285	15200	35.52		27	25300	172.61	40	35800	50.95	146	25300	40.47	167	35800	136.51	51	25300	180.3	45	35800	63.16
						254	15200	112.88				373	21500	37.56	285	15200	40.77		27	25300	222.96	40	35800	144.37	146	25300	55.25	167	35800	140.05	52	25300	103.54	45	35800	66.75
						255	21500	27.83				373	21500	40.61	285	15200	43.4		28	25300	20.15	40	35800	191.81	146	25300	68.66	167	35800	142.68	52	25300	146.41	45	35800	70.58
						255	21500	32.03				381	21500	28.84	293	15200	25.98		28	25300	132.79	41	35800	156.53	146	25300	80.53	167	35800	201.59	54	25300	168.54	45	35800	78.27
						261	15200	36.01				381	21500	33.79	293	15200	32.05		28	25300	175.43	41	35800	175.38	147	35800	13.78	183	25300	11.92	54	25300	175.72	45	35800	84.44
						266	15200	92.51				381	21500	38.85	293	15200	36.67		28	25300	196.24	41	35800	180.92	147	35800	28.27	183	25300	15.39	54	25300	181.34	45	35800	87.3
						268	15200	71.58				381	21500	44.31	293	15200	39.79		28	25300	217.48	41	35800	210.05	147	35800	37.59	183	25300	39.09	54	25300	186.18	45	35800	108.61
						270	15200	190.27				381	21500	56.6	297	21500	41.25		29	25300	96.61	42	35800	203.92	147	35800	57.83	183	25300	228.44	54	25300	193.97	45	35800	115.01
						271	15200	165.76				385	21500	30.95	299	15200	28.8		29	25300	115.4	42	35800	224.81	152	25300	129.98	184	35800	130	54	25300	204.32	48	35800	52.02
						273	15200	109.15				385	21500	38.25	299	15200	38.4		29	25300	165.12	43	35800	219.66	153	35800	66.74	189	35800	77.04	56	25300	28.82	49	25300	12.04
						278	15200	110.61				385	21500	45.16	299	15200	42.5		29	25300	218.55	43	35800	248.9	153	35800	79.15	189	35800	93.29	56	25300	34.84	49	25300	18.31
						279	15200	88.98				385	21500	49.93	313	15200	30.14		29	25300	230.25	44	35800	20.35	153	35800	92.14	189	35800	114.88	56	25300	39.87	49	25300	25.78
						281	21500	61.18				388	15200	216.34	313	15200	33.49		29	25300	239.86	44	35800	52.03	153	35800	116.69	193	25300	12.39	56	25300	42.91	49	25300	32.5
						286	15200	38.81				390	21500	28.73	313	15200	36.36		30	25300	26.59	44	35800	190.85	155	25300	91.55	193	25300	17.04	56	25300	45.67	49	25300	51.53
						291	15200	193.02				390	21500	36.14	313	15200	44.44		30	25300	153.94	45	35800	22.76	155	25300	108.52	199	35800	147.51	56	25300	48.53	49	25300	58.32
						295	15200	241.02				390	21500	41.02	313	15200	58.29		30	25300	173.7	45	35800	68.5	155	25300	131.45	199	35800	167.51	56	25300	51.16	49	25300	69.58
						307	15200	26				398	21500	26.77	320	15200	32.3		30	25300	198.04	45	35800	141.97	155	25300	151.62	199	35800	186.63	56	25300	60.09	49	25300	77.91
						308	15200	46.13				398	21500	33.1	320	15200	41.45		31	25300	17.77	45	35800	182.06	155	25300	179.38	199	35800	197.32	56	25300	63.44	49	25300	103.98
						308	15200	64.3				398	21500	37.81	320	15200	45.02		31	25300	145.52	46	35800	118.57	156	25300	196.19	201	35800	17.91	56	25300	70.3	49	25300	107.29
						316	21500	32.49							325	21500	223.41		31	25300	163.1	46	35800	123.39	156	25300	216.46	201	35800	24.42	56	25300	75.93	49	25300	121.71
						319	15200	249.16							336	15200	29.46		31	25300	175.52	46	35800	127.46	162	35800	33.24	201	35800	52.1	59	25300	101.47	49	25300	124.45
						320	15200	107.35							336	15200	33.42		31	25300	208.77	46	35800	131.72	162	35800	38.27	202	25300	12.85	59	25300	111.61	49	25300	138.87
						321	15200	210.31							336	15200	38.02		31	25300	217.82	46	35800	138.11	162	35800	41.81	207	25300	11.69	59	25300	120.41	51	35800	206.72
						333	15200	92.33							336	15200	42.6		31	25300	229.26	46	35800	143.13	162	35800	45.29	207	25300	20.09	59	25300	136	51	35800	211.8
						337	15200	42.73							336	15200	49.17		32	25300	28.52	46	35800	146.05	162	35800	73.18	218	35800	155.84	59	25300	144.2	51	35800	216.27
						338	15200	31.37							336	15200	52.83		32	25300	41.11	46	35800	170.74	162	35800	101.98	222	35800	61.57	61	25300	114.3	51	35800	218.9
						339	15200	121.91							336	15200	56.19		32	25300	138.75	46	35800	190.15	163	25300	98.55	228	35800	20.86	61	25300	118.88	51	35800	225.72
						353	15200	44.95							340	15200	25.51		32	25300	182.52	46	35800	226.72	163	25300	108.47	228	35800	44.7	61	25300	141.76	51	35800	228.66
						354	21500	32.1							340	15200	34.91		32	25300	199.13	48	35800	1.99	163	25300	115.01	234	35800	137.62	61	25300	146.67	51	35800	238.59
						354	21500	55.7							340	15200	38.63		32	25300	232	48	35800	13.92	163	25300	139.36	234	35800	144.55	61	25300	149.64	51	35800	246.27
						354	21500	71.93							340	15200	59.39		32	25300	242.53	48	35800	29.6	163	25300	160.26	235	35800	247.37	62	25300	144.49	52	35800	0.51
						354	21500	89.98							346	21500	198.35		32	25300	247.38	48	35800	88.86	168	35800	37.7	236	25300	3.08	62	25300	148.2	52	35800	4.61
						354	21500	110.39							346	21500	217.99		33	25300	18.43	48	35800	141.93	168	35800	46.83	236	25300	13.38	62	25300	154.83	52	35800	11.16
						354	21500	242.77							348	21500	28.66		33	25300	112.92	48	35800	208.33	168	35800	56.87	236	25300	105.8	62	25300	163.52	52	35800	18.77
						355	15200	237.13							359	15200	26.56		33	25300	116.78	48	35800	212.2	168	35800	66.27	236	25300	190.73	62	25300	166.76	52	35800	24.52
						371	15200	60.23							359	15200	33.35		33	25300	135.36	48	35800	216.56	168	35800	117.75	236	25300	193.46	62	25300	171.79	52	35800	27.58
						375	15200	229.2							359	15200	37.18		33	25300	144.52	48	35800	228.95	172	25300	128.75	236	25300	196.87	62	25300	183.46	52	35800	32.24
						393	15200	144.61							359	15200	42.01		33	25300	163.83	48	35800	240.62	172	25300	131.97	236	25300	200.06	62	25300	201.59	52	35800	46.82
						398	15200	46.18							359	15200	47.5		33	25300	209.92	49	25300	8.94	172	25300	144.56	237	35800	20.48	62	25300	205.92	52	35800	60.51
						399	15200	109.02							359	15200	50.65		33	25300	237.61	49	25300	11.8	172	25300	150.14	237	35800	24.44	64	25300	27.64	53	35800	23.01
						399	15200	131.67							359	15200	56.59		34	25300	117.26	49	25300	14.44	172	25300	188.94	237	35800	31.12	64	25300	32.9	53	35800	26.3
						399	15200	182.2							363	15200	32.12		34	25300	120.01	49	25300	18.56	174	35800	24.95	237	35800	35.75	64	25300	44.05	53	35800	134.2
						400	15200	89.47							363	15200	39.86		34	25300	124.46	50	35800	37.81	174	35800	33.37	237	35800	97	64	25300	55.72	53	35800	167.93
						400	15200	184.62							363	15200	54.52		34	25300	143.26	51	35800	14.31	174	35800	45.25	237	35800	101.33	64	25300	66.87	53	35800	189.89
															371	15200	26.2		34	25300	183.86	51	35800	39.44	174	35800	52.22	237	35800	104.22	64	25300	72.03	53	35800	221.37
															371	15200	31.55		34	25300	198.33	51	35800	61.4	174	35800	65.13	237	35800	108.27	64	25300	75.4	53	35800	245.31
															371	15200	45.05		34	25300	219.9	51	35800	233.6	175	25300	120	237	35800	161.11	64	25300	82.31	54	35800	12.46
															371	15200	51.4		34	25300	234.52	52	35800	123.18	175	25300	137.38	237	35800	164.1	64	25300	85.63	54	35800	26.77
															398	15200	23.96		35	25300	39.79	52	35800	158.48	175	25300	150.37	237	35800	167.18	64	25300	89.39	54	35800	32.72
															398	15200	28.02		35	25300	56.93	52	35800	170.7	178	25300	91.32	237	35800	171.88	64	25300	102.12	54	35800	53.84
															398	15200	34.13		35	25300	101.47	52	35800	183.06	178	25300	102.52	237	35800	175.14	64	25300	104.75	55	35800	84.87
															398	15200	44.32		35	25300	125.31	52	35800	196.23	180	35800	65.62	237	35800	229.15	64	25300	109.09	55	35800	117.48
															398	15200	55.87		35	25300	178.66	53	35800	167.61	181	25300	60.77	237	35800	232.01	64	25300	113.62	55	35800	120.96
															398	15200	202.39		35	25300	197.08	53	35800	199.18	182	25300	116.33	237	35800	235.13	64	25300	116.91	55	35800	125.39
																			35	25300	217.18	53	35800	220.44	182	25300	148.2	237	35800	240.26	64	25300	122.62	55	35800	175.86
																			36	25300	3.29	53	35800	228.04	184	25300	101.9	238	35800	41	64	25300	126.46	57	35800	161.18
																			36	25300	46.68	54	25300	12.1	184	25300	105.44	238	35800	45.08	64	25300	139.87	57	35800	180.89
																			36	25300	62.73	54	25300	51.94	184	25300	114.01	238	35800	52.98	64	25300	142.5	58	35800	17.83
																			36	25300	72.89	54	25300	64.36	184	25300	120.57	249	35800	26.91	64	25300	147.27	60	35800	220.13
																			36	25300	101.5	54	25300	69.63	184	25300	131.39	249	35800	36.22	64	25300	200.6	61	35800	101.12
																			36	25300	125.73	54	25300	76.15	184	25300	159.94	249	35800	41.32	64	25300	218.76	61	35800	107.4
																			36	25300	133.48	54	25300	88.15	184	25300	167.34	253	35800	167.16	64	25300	243.03	61	35800	110.59
																			37	25300	1.32	54	25300	104.92	188	35800	12.33	253	35800	176.09	65	35800	6.62	61	35800	125.58
																			37	25300	155.04	54	25300	134.21	188	35800	18.52	258	25300	11.76	65	35800	13.29	61	35800	141.41
																			37	25300	172.76	54	25300	166.38	188	35800	23.95	260	35800	148.65	65	35800	15.92	61	35800	162.02
																			37	25300	188.55	55	35800	98.11	188	35800	45.77	260	35800	188.4	65	35800	18.55	61	35800	194.62
																			38	25300	2.6	55	35800	107.67	188	35800	61.36	265	35800	139.79	65	35800	131.74	62	25300	12.77
																			38	25300	56.88	55	35800	112.13	189	25300	68.98	265	35800	169.58	65	35800	151.78	62	25300	54.59
																			38	25300	154.49	55	35800	115.22	189	25300	82.09	266	25300	12.13	65	35800	214.86	62	25300	64.98
																			38	25300	162.96	55	35800	121.32	195	35800	17.05	270	25300	12.36	65	35800	220.15	62	25300	85.61
																			38	25300	185.43	55	35800	129.08	195	35800	20.1	270	25300	30.24	65	35800	223.22	62	25300	110.39
																			38	25300	194.17	55	35800	143.23	195	35800	25.44	276	35800	145.88	65	35800	228.57	62	25300	124.23
																			38	25300	206.44	55	35800	154.27	195	35800	43.57	276	35800	150.71	65	35800	232.05	62	25300	169.67
																			38	25300	246.88	55	35800	163.53	195	35800	58.25	276	35800	173.26	65	35800	238.52	62	25300	173.02
																			39	25300	161.28	55	35800	169.91	195	35800	130.48	287	25300	12.07	65	35800	242.02	62	25300	182.19
																			39	25300	169.83	55	35800	175.51	195	35800	135.45	294	35800	157.9	65	35800	247.81	62	25300	203.97
																			39	25300	180.19	55	35800	188.98	195	35800	140.3	294	35800	194.87	66	25300	15.38	64	35800	207.24
																			39	25300	190.87	56	35800	233.06	195	35800	144.19	296	25300	12.92	66	25300	19.81	64	35800	221.91
																			39	25300	212.23	56	35800	248.27	195	35800	229.07	298	35800	123.58	66	25300	26.27	64	35800	224.96
																			39	25300	220	57	35800	13.9	196	25300	25.54	298	35800	140.42	66	25300	97.66	64	35800	231.63
																			40	25300	31.5	57	35800	28.99	196	25300	28.48	302	35800	91.95	66	25300	101.75	64	35800	234.28
																			40	25300	77.22	57	35800	44.68	196	25300	39.08	302	35800	95.78	68	25300	50.02	64	35800	239.26
																			40	25300	93.62	57	35800	228.9	196	25300	92.95	302	35800	99.29	68	25300	60.14	64	35800	246.47
																			40	25300	108.03	58	35800	50.39	196	25300	103.41	302	35800	101.92	68	25300	63.08	65	35800	0.19
																			40	25300	156.09	58	35800	223.92	196	25300	120.73	302	35800	105.04	68	25300	66.29	65	35800	9.33
																			40	25300	191.28	58	35800	245.86	196	25300	148.47	302	35800	114.56	68	25300	68.94	65	35800	13.52
																			40	25300	201.52	59	35800	107.44	196	25300	151.31	302	35800	183.35	68	25300	77.9	65	35800	16.88
																			41	35800	12.96	59	35800	126.06	196	25300	164.44	302	35800	187.88	68	25300	80.6	65	35800	24.65
																			41	35800	16.16	59	35800	135.05	196	25300	178.49	321	35800	105.84	68	25300	98.85	65	35800	30.55
																			41	35800	38.37	59	35800	172.21	196	25300	206.15	321	35800	115.08	68	25300	110.54	65	35800	36.15
																			41	35800	42.26	59	35800	211.95	196	25300	211.86	321	35800	120.21	68	25300	115.69	65	35800	42.69
																			41	35800	48.5	60	35800	0.83	197	25300	15.45	321	35800	139.87	68	25300	123.71	68	35800	249.38
																			41	35800	102.24	60	35800	13.62	197	25300	82.23	323	25300	11.53	71	35800	12.54	70	35800	223.22
																			41	35800	117.21	60	35800	19.85	197	25300	90.88	323	25300	17.18	71	35800	17.44	70	35800	230.11
																			41	35800	192.07	60	35800	25.83	197	25300	149.75	323	25300	88.48	71	35800	30.83	70	35800	233.18
																			41	35800	197.05	60	35800	44.22	208	25300	8.16	323	25300	108.58	71	35800	44.2	70	35800	236.34
																			42	25300	33.26	60	35800	96.95	208	25300	16.79	323	25300	111.3	71	35800	55	70	35800	239.43
																			42	25300	127.48	60	35800	105.96	208	25300	39.96	324	35800	13.67	71	35800	60.4	70	35800	242.77
																			42	25300	151.12	60	35800	118.11	208	25300	49.63	328	25300	11.62	71	35800	66.91	70	35800	247.77
																			42	25300	157.6	60	35800	130.56	208	25300	163.16	328	25300	21.78	71	35800	69.86	71	25300	6.85
																			42	25300	166.72	60	35800	140.83	214	25300	131.7	336	35800	178.17	71	35800	90.4	71	25300	13.25
																			42	25300	188.1	60	35800	160.14	214	25300	143.48	336	35800	186.49	71	35800	93.95	71	25300	19.75
																			42	25300	216.95	61	35800	106.01	214	25300	159.34	337	25300	12.21	71	35800	103.58	71	25300	39.24
																			42	25300	228.36	61	35800	115.44	214	25300	168.15	337	25300	16.44	72	25300	181	71	25300	52.37
																			43	25300	33.99	61	35800	121.2	216	35800	13.73	338	35800	13.95	76	25300	12.38	71	25300	65.15
																			43	25300	201.69	61	35800	136.56	216	35800	20.92	338	35800	79.01	77	35800	14.17	71	25300	70.39
																			43	25300	220.14	61	35800	146.1	216	35800	25.37	338	35800	104.02	77	35800	20.82	71	25300	79.18
																			43	25300	228.43	61	35800	190.2	216	35800	30.8	338	35800	112.69	77	35800	29.88	71	25300	95.26
																			43	25300	240.9	62	35800	70.39	216	35800	34.95	338	35800	133.54	77	35800	35.11	71	25300	102.89
																			44	25300	1.64	62	35800	90.38	216	35800	38.04	348	25300	12.79	77	35800	37.88	71	25300	113.81
																			44	25300	147.88	62	35800	121.4	216	35800	48.24	358	25300	11.93	77	35800	46.54	71	25300	119.97
																			44	25300	157.27	62	35800	164.32	217	25300	16.42	358	25300	50.36	77	35800	49.79	72	35800	112.72
																			44	25300	169.56	62	35800	186.03	217	25300	22.14	367	25300	11.31	77	35800	90.76	78	35800	3.47
																			44	25300	188.52	62	35800	215.18	217	25300	28.24	367	25300	21.62	77	35800	118.92	78	35800	25.84
																			44	25300	205.46	62	35800	235.23	217	25300	38.05	367	25300	27.61	77	35800	142.44	78	35800	92.28
																			44	25300	240.73	62	35800	246.16	220	35800	22.04	367	25300	99.97	77	35800	147.12	78	35800	100.29
																			45	25300	68.24	63	35800	117.97	220	35800	50.61	370	35800	172.14	77	35800	171.22	78	35800	110.36
																			45	25300	101.64	63	35800	123.1	220	35800	92.2	370	35800	180.57	81	35800	13.07	78	35800	113.34
																			45	25300	213.38	63	35800	138.59	223	25300	112.69	370	35800	210.64	81	35800	18.23	78	35800	123.06
																			45	25300	222.98	64	35800	39.68	223	25300	124.53	373	35800	168.21	81	35800	26.24	78	35800	126.05
																			45	25300	244.91	64	35800	153.27	223	25300	137.28	373	35800	199.81	81	35800	29.69	78	35800	139.13
																			46	35800	22.06	64	35800	178.06	223	25300	150.7	377	35800	151.29	81	35800	33.84	78	35800	146.48
																			46	35800	24.71	64	35800	195.2	223	25300	159.28	377	35800	161.77	81	35800	45.58	78	35800	168.14
																			46	35800	34.57	64	35800	205.39	223	25300	177.73	377	35800	172.78	81	35800	68.04	78	35800	191.35
																			46	35800	52.96	65	35800	91.49	223	25300	193.36	380	25300	11.7	81	35800	70.67	80	25300	18.78
																			46	35800	65.76	65	35800	147.33	224	25300	217.98	381	35800	178.9	81	35800	78.12	80	25300	26.95
																			46	35800	133.21	65	35800	167.51	224	25300	224.71	381	35800	197.72	81	35800	82	80	25300	34.52
																			46	35800	180.27	66	25300	11.42	224	25300	227.76	381	35800	222.09	81	35800	90.07	80	25300	37.88
																			46	35800	199.59	66	25300	14.74	224	25300	233.96	382	35800	1.63	81	35800	108.8	80	25300	51.22
																			46	35800	223.78	66	25300	17.63	224	25300	249.18	382	35800	19.08	81	35800	111.76	80	25300	130.73
																			47	25300	111.29	66	25300	21.96	225	25300	5.87	382	35800	40.4	84	25300	214.78	82	35800	86.42
																			47	25300	176.71	66	25300	75.86	225	25300	27.48	387	25300	12.75	84	25300	236.95	82	35800	91.17
																			47	25300	187.81	67	35800	237.39	225	25300	61.78	391	25300	12.02	85	35800	20.58	82	35800	93.8
																			47	25300	233.8	68	35800	86.89	225	25300	69.12	394	35800	169.07	85	35800	23.37	82	35800	96.89
																			47	25300	242.49	69	35800	67.12	225	25300	77.65	399	35800	220.02	85	35800	36.93	82	35800	99.59
																			48	25300	154.4	69	35800	152.54	225	25300	212.42	400	25300	1.3	85	35800	42.23	82	35800	103.47
																			48	25300	183.19	69	35800	223.66	226	25300	36.6	400	25300	11.81	85	35800	49.43	82	35800	107.14
																			48	25300	243.9	70	35800	138.91	226	25300	91.72				85	35800	52.21	82	35800	123.85
																			49	25300	9.89	70	35800	178.05	226	25300	94.59				85	35800	56.11	82	35800	142.5
																			49	25300	16.23	70	35800	207.07	226	25300	97.33				85	35800	58.74	82	35800	159.18
																			49	25300	21.62	70	35800	231.05	226	25300	101				85	35800	65.98	82	35800	162.38
																			49	25300	77	70	35800	238.1	226	25300	104.08				85	35800	70.76	84	35800	39.31
																			49	25300	108.9	72	35800	25.93	226	25300	166.48				85	35800	77.01	84	35800	212.48
																			49	25300	189.06	72	35800	65.76	232	35800	13.63				85	35800	80.33	84	35800	217.43
																			49	25300	219.8	72	35800	97.71	232	35800	20.81				85	35800	88.58	84	35800	220.43
																			49	25300	234.07	72	35800	108.34	232	35800	25.47				85	35800	103.6	84	35800	225.32
																			49	25300	246.72	73	35800	18.37	232	35800	33.14				85	35800	116.75	84	35800	230.25
																			50	25300	132.12	73	35800	30.95	232	35800	38.41				86	25300	16.04	84	35800	233.09
																			50	25300	167.61	73	35800	46.78	232	35800	42.21				86	25300	219.89	84	35800	235.89
																			50	25300	183.07	73	35800	59.35	232	35800	44.84				86	25300	223.76	84	35800	242.47
																			50	25300	201.06	73	35800	134.5	232	35800	48.61				87	25300	16.32	84	35800	245.52
																			51	25300	2.77	73	35800	146.25	232	35800	82.81				88	25300	192.68	85	35800	2.96
																			51	25300	13.2	73	35800	161.7	232	35800	99.48				90	25300	81.83	85	35800	17.9
																			51	25300	21.94	73	35800	177.12	234	25300	185.15				90	25300	90.36	85	35800	23.48
																			51	25300	70.22	73	35800	183.45	234	25300	191.28				93	25300	59.61	90	25300	11.85
																			51	25300	97.29	73	35800	190.24	234	25300	205.88				93	25300	66.44	90	25300	20.25
																			51	25300	142.7	73	35800	208.26	234	25300	221.53				93	25300	69.08	90	25300	25.99
																			51	25300	175.68	73	35800	217.51	242	25300	175.54				93	25300	72.36	90	25300	32.29
																			51	25300	235.93	74	35800	185.78	248	25300	234.78				93	25300	75.51	90	25300	36.31
																			52	25300	32.78	74	35800	206.65	249	25300	23.31				93	25300	79	90	25300	46.69
																			52	25300	101.94	74	35800	243.9	249	25300	238.12				93	25300	82.92	90	25300	50.07
																			52	25300	104.73	75	35800	2.98	250	25300	3.31				93	25300	88.57	90	25300	54.13
																			52	25300	121.48	75	35800	219.45	250	25300	19.41				93	25300	96.29	90	25300	58.47
																			52	25300	126.36	76	35800	40.05	250	25300	31.15				93	25300	98.92	90	25300	67.2
																			53	25300	44.51	76	35800	248.58	250	25300	86.91				93	25300	106.27	90	25300	70.02
																			53	25300	122.42	77	25300	11.9	250	25300	90.03				93	25300	112.36	90	25300	80.65
																			53	25300	201.44	77	25300	20.3	250	25300	95.07				93	25300	123.33	90	25300	83.28
																			53	25300	221.55	77	25300	23.85	250	25300	101.2				93	25300	151.03	90	25300	94.56
																			53	25300	241.71	77	25300	31.25	250	25300	164.51				94	25300	88.64	90	25300	111.4
																			54	35800	18.49	77	25300	57.2	250	25300	167.56				94	25300	102.77	90	25300	114.33
																			54	35800	27.14	77	25300	67.13	250	25300	170.43				94	25300	113.69	90	25300	118.36
																			54	35800	40.1	77	25300	87.4	250	25300	174.51				94	25300	118.07	90	25300	134.33
																			54	35800	45.05	78	35800	35.1	250	25300	178.23				94	25300	123.2	90	25300	146.41
																			54	35800	64.05	78	35800	64.27	250	25300	247.15				94	25300	137.67	90	25300	157.28
																			54	35800	94.76	79	35800	58.83	251	25300	0.08				94	25300	141	90	25300	173.19
																			55	25300	22.71	79	35800	111.27	251	25300	2.91				94	25300	151.2	93	35800	21.41
																			55	25300	48.07	80	35800	28.25	251	25300	80.43				94	25300	159.43	93	35800	74.6
																			55	25300	61.95	80	35800	55.21	251	25300	85.23				99	25300	42.46	93	35800	90.21
																			55	25300	92.32	80	35800	137.21	251	25300	92				99	25300	63.77	93	35800	103.76
																			55	25300	184.5	81	35800	117.29	251	25300	141.15				99	25300	66.7	96	35800	50.06
																			55	25300	205.86	81	35800	124.02	251	25300	146.26				99	25300	76.22	96	35800	57.03
																			56	25300	35.61	81	35800	137.36	251	25300	150.1				99	25300	79.08	96	35800	83.9
																			56	25300	70.42	81	35800	140.68	251	25300	157.67				99	25300	94.69	96	35800	92.1
																			56	25300	91.73	81	35800	159.27	251	25300	167.63				100	25300	73.17	96	35800	95.31
																			56	25300	128.81	81	35800	165.05	251	25300	205.93				100	25300	91.92	96	35800	106.39
																			56	25300	143.27	81	35800	172.88	251	25300	213.68				100	25300	107.33	96	35800	110.37
																			56	25300	157.42	81	35800	184.78	251	25300	217.23				100	25300	152.58	96	35800	139.09
																			56	25300	173.74	82	35800	243.34	251	25300	227.62				101	35800	13.57	97	35800	184.37
																			57	25300	67.81	83	35800	1.1	252	25300	8.87				101	35800	16.47	97	35800	188.1
																			57	25300	102.34	83	35800	5.73	252	25300	12.9				101	35800	19.61	97	35800	191.42
																			57	25300	158.64	83	35800	24.66	252	25300	15.54				101	35800	25.57	97	35800	194.05
																			57	25300	225.03	83	35800	36.06	252	25300	22.66				101	35800	39.17	97	35800	196.8
																			57	25300	245.15	84	35800	108.41	252	25300	40.86				101	35800	45.97	97	35800	203.47
																			58	25300	116.28	84	35800	128.9	253	35800	21.47				101	35800	49.47	97	35800	206.1
																			58	25300	120.57	84	35800	220.54	253	35800	29.59				101	35800	54.05	97	35800	214.55
																			58	25300	137.31	85	35800	22.57	259	35800	23.47				101	35800	71.94	97	35800	223.39
																			58	25300	151.82	85	35800	113.71	259	35800	28.05				101	35800	165.92	97	35800	238.75
																			58	25300	160.36	85	35800	189.79	259	35800	32.97				101	35800	187.28	97	35800	246.05
																			58	25300	216.92	87	35800	52.2	259	35800	36.68				101	35800	221.63	98	35800	15.8
																			59	25300	111.34	87	35800	95.29	259	35800	40.37				106	25300	81.82	99	25300	18.21
																			59	25300	137.66	87	35800	175.56	259	35800	52.04				106	25300	87.54	99	25300	39.56
																			60	25300	80.84	88	35800	198.81	268	25300	108.1				106	25300	90.92	99	25300	45.93
																			60	25300	98.56	89	35800	164.5	269	25300	211.56				106	25300	94.04	99	25300	51.87
																			60	25300	108.12	90	25300	11.64	270	25300	231.17				106	25300	97.17	99	25300	55.22
																			60	25300	114.52	90	25300	17.82	270	25300	247.16				106	25300	101.2	99	25300	59.56
																			60	25300	143.05	90	25300	42.74	271	25300	3.64				106	25300	109.7	99	25300	67.21
																			60	25300	174.01	90	25300	67.77	271	25300	15.95				106	25300	112.75	99	25300	73.12
																			60	25300	190.96	90	25300	79.25	271	25300	56.57				106	25300	123.13	99	25300	78.61
																			61	25300	1.61	90	25300	84.9	271	25300	137.95				106	25300	126.12	99	25300	82.94
																			61	25300	30.28	91	35800	65.47	271	25300	208.01				106	25300	154.15	99	25300	89.99
																			61	25300	110.52	91	35800	80.41	271	25300	211.95				106	25300	159.82	99	25300	114.82
																			61	25300	124.47	91	35800	100.28	271	25300	217.56				109	25300	20.53	99	25300	122.32
																			61	25300	129.85	92	35800	89.18	272	35800	17.21				109	25300	134.63	99	25300	126.13
																			61	25300	172.84	92	35800	101.03	272	35800	21.11				111	25300	8.84	99	25300	131.67
																			61	25300	193.73	92	35800	118.49	272	35800	125.62				112	25300	134.97	99	25300	155.96
																			62	25300	16.06	92	35800	129.03	272	35800	176.81				112	25300	140.38	99	25300	194.76
																			62	25300	64.92	92	35800	214.04	272	35800	249.54				112	25300	143.02	99	25300	198.75
																			62	25300	120.87	93	35800	34.22	278	35800	30.11				112	25300	148.57	99	25300	202.43
																			62	25300	134.24	93	35800	117.39	278	35800	34.88				112	25300	151.2	100	35800	18.91
																			62	25300	139.22	93	35800	157.41	278	35800	40.86				112	25300	156.11	100	35800	22.39
																			62	25300	145.55	94	25300	13.31	278	35800	53.34				112	25300	161.04	100	35800	41.25
																			62	25300	192.99	94	25300	19.21	278	35800	179.37				112	25300	165.12	100	35800	60.87
																			62	25300	225.98	94	25300	85.42	282	25300	117.09				112	25300	167.76	100	35800	85.82
																			64	25300	10.79	94	25300	119.98	282	25300	134.73				112	25300	171.02	100	35800	91.67
																			64	25300	71.06	95	35800	154.82	285	35800	30.31				112	25300	177.31	100	35800	100.35
																			64	25300	109.92	95	35800	168.76	285	35800	67.05				112	25300	186.91	100	35800	169.55
																			64	25300	128.92	95	35800	185.97	291	25300	124.94				112	25300	198.93	100	35800	173.21
																			64	25300	191.08	95	35800	206.34	291	25300	129.96				112	25300	222.32	101	35800	14.95
																			64	25300	196.06	95	35800	242.47	291	25300	136.09				113	35800	12.97	101	35800	17.74
																			65	25300	1.71	96	35800	47.14	291	25300	141.44				113	35800	16.74	101	35800	59.78
																			65	25300	178.35	98	35800	11.44	291	25300	155.92				113	35800	21.1	101	35800	69.12
																			65	25300	234.62	98	35800	21.29	291	25300	169.56				113	35800	227.73	101	35800	84.3
																			66	25300	142.63	98	35800	32.93	291	25300	242.58				113	35800	244.03	101	35800	88.21
																			66	25300	166.64	98	35800	125.53	292	25300	67.87				113	35800	249.89	101	35800	92.95
																			66	25300	210.5	98	35800	132.68	292	25300	72.46				114	25300	9.61	101	35800	96.22
																			67	25300	7.17	98	35800	143.01	292	25300	81.47				114	25300	14.01	101	35800	102.49
																			67	25300	114.69	98	35800	146.54	292	25300	132.46				114	25300	17.83	101	35800	112.46
																			67	25300	133.72	98	35800	149.78	292	25300	192.76				114	25300	63.18	102	35800	239.54
																			67	25300	148.25	98	35800	154.83	292	25300	197.93				114	25300	83.99	103	25300	19.39
																			67	25300	156.47	98	35800	196.78	292	25300	209.22				114	25300	92.37	103	25300	187.36
																			67	25300	220.19	98	35800	209.78	293	25300	0.35				114	25300	152.67	106	35800	238.29
																			68	25300	15.87	100	35800	172.71	293	25300	11.42				114	25300	158.54	106	35800	246.7
																			68	25300	42.61	100	35800	224.37	293	25300	17.71				115	25300	229.23	108	35800	118.69
																			69	25300	16.24	100	35800	234.17	293	25300	77.16				115	25300	245.95	108	35800	126.68
																			69	25300	53.13	101	35800	10.69	293	25300	84.56				116	25300	223.37	108	35800	137.38
																			69	25300	95.06	102	35800	102.2	293	25300	130.51				116	25300	226.14	108	35800	147.93
																			69	25300	134.61	103	35800	82.74	293	25300	142.65				116	25300	228.92	108	35800	155.61
																			70	35800	4.73	103	35800	99.03	293	25300	153.3				116	25300	232.13	108	35800	160.15
																			70	35800	14.23	104	25300	24.24	299	35800	12.72				116	25300	236.06	108	35800	169.84
																			70	35800	27.9	104	25300	49.82	299	35800	18.61				116	25300	238.86	108	35800	173.06
																			70	35800	32.11	104	25300	86.71	299	35800	24				116	25300	242.95	108	35800	180.72
																			70	35800	38.42	105	35800	171.66	299	35800	28.84				116	25300	246.59	108	35800	184.93
																			70	35800	49.59	105	35800	199.59	299	35800	32.49				117	25300	4.51	108	35800	195.22
																			70	35800	177.56	105	35800	226.37	299	35800	37.07				117	25300	9.81	108	35800	200.57
																			70	35800	193.78	106	35800	4.68	299	35800	41.82				117	25300	14.49	108	35800	214.8
																			71	25300	165.92	106	35800	18.81	299	35800	44.46				119	25300	2.53	108	35800	221.73
																			71	25300	189.13	106	35800	33.09	299	35800	79.8				119	25300	32.94	110	25300	12.28
																			71	25300	209.45	106	35800	51.13	302	25300	135.69				119	25300	124.31	110	25300	16.44
																			72	25300	36.23	106	35800	53.95	302	25300	140.69				119	25300	127.84	110	25300	22.05
																			72	25300	151.58	106	35800	66.73	302	25300	145.6				119	25300	132.15	110	25300	25.62
																			72	25300	168.54	106	35800	79.74	302	25300	232.88				119	25300	135.01	110	25300	29.61
																			72	25300	188.34	106	35800	86.75	311	35800	21.21				119	25300	137.65	110	25300	34.37
																			72	25300	200.02	107	35800	164.4	311	35800	24.67				119	25300	140.83	110	25300	49.76
																			73	25300	135.78	108	35800	28.71	311	35800	33.54				119	25300	147.42	110	25300	57.08
																			73	25300	146.95	108	35800	35.44	311	35800	37.76				119	25300	154.16	110	25300	60.67
																			73	25300	188.5	108	35800	87.42	311	35800	47.21				119	25300	156.95	110	25300	69.26
																			73	25300	210.55	109	35800	11.01	311	35800	50.55				119	25300	163.54	110	25300	76.11
																			74	25300	124.62	109	35800	50.57	311	35800	62.81				119	25300	168.7	110	25300	80.06
																			74	25300	129.33	109	35800	68.99	311	35800	74.07				119	25300	173.9	110	25300	88.39
																			74	25300	132.48	109	35800	151.04	313	25300	161.03				119	25300	182.17	110	25300	93.54
																			74	25300	159.4	109	35800	184.36	313	25300	164.51				119	25300	194.17	110	25300	96.27
																			74	25300	166.49	109	35800	214.42	313	25300	171.05				119	25300	197.02	110	25300	108.03
																			74	25300	213.11	109	35800	240.92	313	25300	184.67				119	25300	205.98	110	25300	113.54
																			75	25300	135.4	110	25300	11.66	313	25300	190.43				119	25300	218.75	111	35800	226.02
																			75	25300	177.22	110	25300	16.77	314	25300	3.03				119	25300	228.73	112	35800	0.93
																			75	25300	184.18	110	25300	21.98	314	25300	6.22				119	25300	232.14	112	35800	3.96
																			75	25300	191.47	110	25300	26.59	314	25300	12.92				120	25300	12.2	114	35800	113.94
																			75	25300	198.38	110	25300	64.66	314	25300	102.82				120	25300	20.44	114	35800	124.21
																			76	25300	164.26	110	25300	70.21	314	25300	118.1				121	25300	168.25	114	35800	131.9
																			76	25300	173.99	111	35800	48.25	314	25300	171.6				123	25300	171.28	114	35800	147.38
																			76	25300	190.38	111	35800	60.55	314	25300	174.73				126	25300	7.18	114	35800	150.24
																			76	25300	201.53	112	35800	143.01	314	25300	178.67				126	25300	38.11	114	35800	159.44
																			77	25300	9.7	112	35800	216.13	314	25300	238.17				126	25300	44.58	114	35800	170.62
																			77	25300	137.4	112	35800	234.59	314	25300	243.35				126	25300	50.1	118	35800	109.77
																			77	25300	149.31	112	35800	239.05	315	25300	47.03				126	25300	57.48	118	35800	115.74
																			77	25300	177.15	112	35800	245.89	315	25300	51.84				126	25300	62.09	118	35800	133.81
																			77	25300	190.81	112	35800	248.52	315	25300	54.47				126	25300	66.68	121	35800	235.11
																			77	25300	198.16	113	35800	4.54	315	25300	64.97				126	25300	71.08	122	35800	13.46
																			77	25300	219.82	113	35800	8.08	315	25300	102.01				126	25300	75.81	122	35800	28.24
																			78	35800	18.54	113	35800	12.35	315	25300	104.86				126	25300	78.74	122	35800	34.06
																			78	35800	32.1	113	35800	18.51	315	25300	108.02				126	25300	81.99	122	35800	43.38
																			78	35800	46.88	113	35800	90.43	315	25300	158.36				126	25300	88.57	122	35800	47.21
																			78	35800	65.51	114	35800	37.52	315	25300	163.19				126	25300	100.54	122	35800	49.96
																			78	35800	179.73	114	35800	53.22	315	25300	168.7				126	25300	117.66	122	35800	99.56
																			78	35800	244.28	114	35800	177.45	319	35800	42.54				126	25300	125.25	122	35800	108.03
																			79	25300	71.94	114	35800	199.45	319	35800	55.32				126	25300	142.77	123	35800	137.55
																			79	25300	208.15	115	35800	69.4	324	35800	36.03				126	25300	148.08	123	35800	147.54
																			79	25300	225.82	116	25300	11.66	324	35800	64.24				126	25300	157.49	123	35800	151.56
																			80	25300	44.22	116	25300	16.88	324	35800	80.36				126	25300	165.42	123	35800	154.58
																			80	25300	91.57	116	25300	23.18	324	35800	89.76				126	25300	191.37	123	35800	158.19
																			80	25300	129.52	116	25300	54.48	332	35800	32.17				129	35800	14.54	123	35800	171.59
																			80	25300	164.29	116	25300	79.63	332	35800	36.76				129	35800	17.45	123	35800	176.66
																			81	25300	36.19	116	25300	110.79	333	25300	125.04				129	35800	21.44	123	35800	183.49
																			81	25300	78.27	116	25300	171.63	333	25300	155.12				129	35800	25.94	124	35800	21.66
																			81	25300	116.75	116	25300	210.55	333	25300	185.93				129	35800	29.55	127	35800	237.77
																			81	25300	152.78	118	35800	200.81	334	25300	209.15				129	35800	33	128	25300	4.14
																			81	25300	200.43	119	35800	13.38	334	25300	213.34				129	35800	40.75	128	25300	11.97
																			82	25300	138.96	119	35800	51.76	334	25300	216.45				129	35800	49.65	128	25300	14.61
																			82	25300	161.94	119	35800	138.86	335	25300	3				129	35800	63.21	128	25300	17.46
																			82	25300	176.26	119	35800	141.79	335	25300	18.61				129	35800	67.87	128	25300	143.83
																			82	25300	196.37	119	35800	147.28	335	25300	26.88				129	35800	92.14	128	25300	154.56
																			82	25300	211.24	119	35800	161.29	335	25300	40.67				129	35800	94.92	128	25300	163.78
																			82	25300	224.68	119	35800	167.57	335	25300	57.51				129	35800	97.9	128	25300	220.79
																			83	25300	17.67	119	35800	170.35	335	25300	70.6				129	35800	130.56	128	25300	228.27
																			84	35800	23.7	119	35800	175.14	335	25300	120.51				129	35800	165.37	128	25300	233.73
																			84	35800	33.66	119	35800	184.71	335	25300	190.09				131	25300	111.56	129	35800	30.31
																			84	35800	37.48	119	35800	199.02	336	25300	0.78				131	25300	126.59	129	35800	43.32
																			84	35800	62.81	119	35800	218.42	336	25300	12.89				131	25300	147.67	129	35800	48.11
																			85	25300	24.99	119	35800	223.99	336	25300	16.64				132	25300	48.58	129	35800	65.43
																			85	25300	39.15	119	35800	241.63	336	25300	91.51				133	25300	227.3	129	35800	71.09
																			85	25300	48.05	120	35800	31.61	336	25300	94.68				133	25300	246.71	129	35800	75.21
																			85	25300	63	121	35800	16.27	336	25300	103.28				134	35800	14.19	129	35800	78.42
																			85	25300	150.45	121	35800	27.83	336	25300	164.92				134	35800	18.87	129	35800	83.71
																			85	25300	162.44	121	35800	99.2	336	25300	168.64				134	35800	22.14	129	35800	91.52
																			85	25300	165.81	121	35800	122.55	344	25300	161.88				134	35800	28.53	129	35800	128.49
																			85	25300	172.26	121	35800	152	344	25300	187.96				134	35800	34.37	129	35800	157.08
																			85	25300	177.94	121	35800	241.41	344	25300	193.97				134	35800	47.22	129	35800	165.88
																			85	25300	185.22	122	35800	15.56	344	25300	213.33				134	35800	49.89	131	35800	56.75
																			85	25300	197.08	122	35800	149.98	344	25300	241.53				134	35800	59.99	133	35800	115.37
																			85	25300	205.45	122	35800	164.62	345	35800	13.48				134	35800	75.17	133	35800	119.39
																			86	25300	86.58	122	35800	178.03	345	35800	17.37				134	35800	94.48	133	35800	123.04
																			86	25300	110.15	122	35800	204.78	345	35800	21.56				134	35800	98.62	133	35800	130.96
																			86	25300	149.6	124	35800	5.58	345	35800	29.72				135	25300	164.17	133	35800	135.29
																			86	25300	237.34	124	35800	72.63	345	35800	242.3				135	25300	200.29	133	35800	141.86
																			87	25300	49.79	124	35800	109.82	346	25300	14.36				136	25300	79.46	133	35800	144.86
																			87	25300	107.61	124	35800	144.8	346	25300	75.21				137	25300	206.44	133	35800	148.32
																			87	25300	121.85	124	35800	151.91	346	25300	85.7				138	35800	16.69	133	35800	152.73
																			87	25300	156.84	124	35800	156.71	346	25300	89.7				138	35800	25.85	133	35800	170.79
																			87	25300	162.19	124	35800	167.18	346	25300	151.46				138	35800	43.37	133	35800	183.58
																			87	25300	168.53	124	35800	170.08	346	25300	154.14				138	35800	50.19	133	35800	203.15
																			87	25300	233.01	124	35800	186.92	346	25300	160.41				138	35800	53.59	133	35800	232.19
																			88	25300	131.58	125	35800	9.69	346	25300	242.69				138	35800	58.61	134	35800	242.47
																			89	25300	103.51	125	35800	37.7	347	25300	44.95				138	35800	63.5	134	35800	245.54
																			89	25300	126.6	126	25300	11.89	347	25300	71.72				138	35800	66.82	134	35800	249.54
																			89	25300	158.58	126	25300	74.56	347	25300	75.32				138	35800	74.69	135	35800	3.32
																			89	25300	179.79	127	35800	133.86	347	25300	142.78				138	35800	86.7	135	35800	6.28
																			89	25300	186.57	128	35800	8.01	347	25300	149.8				138	35800	92.41	135	35800	10.26
																			89	25300	244.54	129	35800	180.03	357	35800	12.58				140	25300	12.6	135	35800	13.5
																			90	25300	13.34	129	35800	236.24	357	35800	49.2				141	25300	13.07	135	35800	16.34
																			90	25300	200.67	129	35800	248.27	362	35800	37.77				141	25300	19.74	135	35800	19.79
																			91	25300	2.53	130	35800	10.18	362	35800	44.94				141	25300	29.99	135	35800	34.65
																			91	25300	11.88	130	35800	67.02	364	25300	98.89				141	25300	33.22	135	35800	38.07
																			91	25300	43.69	130	35800	74.35	365	25300	222.42				141	25300	38.04	138	35800	202.5
																			91	25300	70.5	130	35800	107.35	365	25300	226.43				141	25300	44.73	139	35800	37.75
																			91	25300	89.37	130	35800	206.26	365	25300	239.43				141	25300	47.87	139	35800	45.29
																			91	25300	121.45	131	35800	52.31	366	25300	2.21				141	25300	50.74	139	35800	47.96
																			91	25300	134.55	131	35800	62.08	366	25300	13.07				141	25300	57.34	139	35800	50.59
																			91	25300	203.81	131	35800	71.2	368	35800	28.31				141	25300	60.49	139	35800	57.14
																			92	25300	0.15	131	35800	86.94	368	35800	33.45				141	25300	70.02	139	35800	68.22
																			92	25300	98.97	131	35800	142.42	373	25300	22.03				141	25300	75.76	139	35800	75.25
																			92	25300	104.61	131	35800	150.02	373	25300	37.51				142	25300	240.32	139	35800	84.8
																			92	25300	167.48	131	35800	154.91	373	25300	70.56				146	25300	121.05	139	35800	96.1
																			92	25300	196.68	131	35800	157.82	376	35800	33.62				146	25300	126.11	139	35800	132.55
																			92	25300	239.86	131	35800	164.33	376	35800	38.83				146	25300	135.25	141	35800	152.33
																			93	35800	14.88	131	35800	184.2	381	25300	83.12				146	25300	138.24	141	35800	157.51
																			93	35800	18.81	131	35800	207.61	383	35800	23.43				146	25300	141	141	35800	168.57
																			93	35800	21.83	131	35800	211.03	383	35800	42.2				146	25300	148.69	141	35800	183.44
																			93	35800	30.2	133	35800	21.23	383	35800	45.59				146	25300	151.78	141	35800	187.28
																			93	35800	39.55	133	35800	26.13	385	25300	206.27				146	25300	156.91	144	35800	167.6
																			93	35800	47.83	133	35800	37.93	388	35800	27.13				146	25300	184.13	144	35800	177.96
																			93	35800	185.4	133	35800	72.18	388	35800	39.05				146	25300	192.31	144	35800	192.85
																			93	35800	213.11	133	35800	92.6	388	35800	44.64				147	25300	243.67	145	35800	32.76
																			93	35800	241.39	135	35800	241.07	388	35800	72.56				147	25300	249.69	145	35800	38.81
																			94	25300	60.18	136	35800	72.21							148	25300	10.99	145	35800	43.05
																			94	25300	79.82	136	35800	166.58							148	25300	14.77	145	35800	55.63
																			94	25300	102.62	136	35800	171.42							148	25300	20.63	145	35800	61.62
																			94	25300	238.17	136	35800	174.4							148	25300	26.09	145	35800	70.6
																			95	25300	16.92	136	35800	177.1							148	25300	44.06	145	35800	73.45
																			95	25300	124.03	136	35800	179.73							148	25300	56.91	145	35800	86.19
																			95	25300	161.62	136	35800	183.7							148	25300	61.92	145	35800	97.69
																			95	25300	208.86	136	35800	197.6							148	25300	69.5	145	35800	157.92
																			95	25300	229.65	136	35800	211.42							148	25300	74.58	146	35800	48.47
																			95	25300	244.82	136	35800	229.36							149	25300	150.67	146	35800	52.21
																			96	25300	59.94	138	35800	8.59							149	25300	155.95	146	35800	55.14
																			96	25300	248.39	138	35800	80.28							149	25300	160.55	146	35800	61.46
																			97	25300	31.13	138	35800	95.97							149	25300	165.07	146	35800	65.2
																			97	25300	51.07	138	35800	199.07							149	25300	168.77	146	35800	68.32
																			97	25300	227.97	138	35800	209.79							149	25300	188.35	146	35800	73.54
																			98	35800	14.23	138	35800	229.08							149	25300	196.62	146	35800	78.83
																			98	35800	19.92	138	35800	234.83							149	25300	215.99	146	35800	81.98
																			98	35800	29.37	139	35800	6.4							150	35800	13.81	146	35800	86.06
																			98	35800	41.21	139	35800	59.95							150	35800	17.93	146	35800	92.63
																			98	35800	48.32	139	35800	240.4							150	35800	26.21	146	35800	97.51
																			98	35800	69.32	140	25300	11.31							150	35800	33.83	146	35800	101.85
																			99	25300	103.49	140	25300	16.84							150	35800	44.24	146	35800	107.64
																			99	25300	123.2	140	25300	19.6							151	25300	95.23	146	35800	113.03
																			99	25300	185.73	140	25300	46.4							151	25300	98.41	146	35800	145.79
																			99	25300	200.6	140	25300	57.96							151	25300	101.61	146	35800	161.77
																			99	25300	236.63	140	25300	63.95							151	25300	108.95	146	35800	239.08
																			100	25300	7.97	140	25300	69.36							151	25300	113.61	146	35800	247.55
																			100	25300	35.62	140	25300	75.96							151	25300	116.7	148	35800	79.15
																			100	25300	98.41	140	25300	83.5							151	25300	135.13	148	35800	82.94
																			100	25300	122.56	140	25300	95.28							154	25300	147.77	148	35800	86.32
																			100	25300	153.1	141	35800	99.55							155	35800	14.75	148	35800	97.85
																			101	25300	50.09	141	35800	108.65							155	35800	18.74	148	35800	105.8
																			101	25300	63.88	141	35800	119.65							155	35800	27.71	148	35800	124.63
																			101	25300	83.1	141	35800	124.11							155	35800	30.52	148	35800	145.52
																			101	25300	166.86	141	35800	130.75							155	35800	38.52	148	35800	157.86
																			102	25300	113.74	141	35800	137.92							155	35800	41.82	148	35800	169.24
																			102	25300	152.67	141	35800	143.01							155	35800	45.55	148	35800	182.63
																			102	25300	179.32	141	35800	146.4							155	35800	48.5	148	35800	196.55
																			102	25300	238.06	141	35800	150.85							155	35800	61.02	148	35800	200.21
																			102	25300	249.29	141	35800	154.12							155	35800	88.65	148	35800	211.9
																			103	25300	126.33	141	35800	158.34							155	35800	118.81	148	35800	228.3
																			104	25300	55.22	141	35800	172.66							156	25300	213.71	148	35800	238.99
																			104	25300	58.3	141	35800	184.62							157	25300	60.92	148	35800	249.49
																			104	25300	65.01	141	35800	194.09							157	25300	67.28	151	35800	96.02
																			104	25300	72.55	141	35800	211.84							157	25300	93.19	151	35800	111.4
																			104	25300	86.35	143	35800	64.19							157	25300	106.74	151	35800	114.23
																			104	25300	106.49	143	35800	105.19							157	25300	116.45	151	35800	121.79
																			105	25300	112.64	144	35800	12.84							157	25300	140.71	151	35800	126.42
																			105	25300	130.62	144	35800	29.59							158	25300	188.57	151	35800	129.88
																			106	25300	40.43	144	35800	52.79							158	25300	198.19	151	35800	133.39
																			106	25300	61.92	144	35800	64.51							158	25300	200.95	151	35800	140.58
																			106	25300	72.58	144	35800	240.72							158	25300	205.97	151	35800	143.59
																			106	25300	91.88	145	35800	29.51							158	25300	245.09	151	35800	146.63
																			106	25300	112.27	145	35800	85.57							162	25300	126.2	151	35800	151.1
																			106	25300	123.35	145	35800	200.35							163	25300	58.55	151	35800	157.75
																			106	25300	148.32	145	35800	211.32							163	25300	67.01	151	35800	164.6
																			106	25300	179.12	145	35800	219.79							163	25300	69.97	151	35800	167.54
																			107	35800	12.52	146	25300	41.84							163	25300	75.75	151	35800	174.41
																			107	35800	17.58	146	25300	54.53							163	25300	87.17	151	35800	178.46
																			107	35800	21.44	146	25300	68.22							163	25300	90.94	154	35800	228.2
																			107	35800	29.62	146	25300	91.1							163	25300	98.67	155	35800	39.01
																			107	35800	39.38	146	25300	107.03							163	25300	105.71	155	35800	78.49
																			107	35800	51.02	146	25300	137.19							163	25300	169.24	155	35800	83.44
																			107	35800	55.77	147	35800	69.47							163	25300	172.45	155	35800	92.01
																			107	35800	134.3	147	35800	85.47							166	35800	14.09	155	35800	112.54
																			107	35800	141.94	147	35800	173.59							166	35800	19.2	155	35800	116.58
																			108	25300	26.77	148	35800	88.51							166	35800	26.81	155	35800	156.62
																			108	25300	50.89	148	35800	92.49							166	35800	30.82	156	35800	121.55
																			108	25300	221.94	148	35800	95.21							166	35800	39.87	157	25300	11.3
																			108	25300	234.3	148	35800	107.71							166	35800	51.58	157	25300	15.53
																			109	25300	26.64	148	35800	114.12							166	35800	62.66	157	25300	28.66
																			109	25300	68.56	148	35800	119.32							166	35800	75.03	157	25300	36.33
																			109	25300	76.22	148	35800	124.96							166	35800	95.01	157	25300	43.4
																			109	25300	200.65	148	35800	131.78							166	35800	220.07	157	25300	47.16
																			110	25300	56.15	148	35800	142.8							168	25300	13.33	157	25300	53.56
																			110	25300	224.21	148	35800	151.87							170	25300	82.03	157	25300	59.58
																			111	25300	23.9	148	35800	159.04							170	25300	87.53	157	25300	115.42
																			111	25300	114.4	148	35800	180.89							170	25300	90.91	157	25300	127.92
																			111	25300	144.18	150	25300	11.9							170	25300	104.13	157	25300	202.08
																			111	25300	151.55	150	25300	31.76							170	25300	116.42	157	25300	206.46
																			111	25300	172.11	150	25300	62.52							171	25300	88.93	161	35800	213.48
																			112	35800	21.8	150	25300	93.22							171	25300	152.16	161	35800	224.78
																			112	35800	25.3	150	25300	103.27							171	25300	178.29	161	35800	231.97
																			112	35800	30.42	150	25300	117.6							171	25300	184.61	161	35800	236.24
																			112	35800	38.27	150	25300	177.78							171	25300	190.08	161	35800	242.06
																			112	35800	57.71	150	25300	213.56							171	25300	201.84	162	25300	12
																			112	35800	67.46	150	25300	235.13							171	25300	206.45	162	25300	140.29
																			112	35800	75.39	151	35800	0.78							171	25300	226.54	162	25300	144.59
																			112	35800	242.05	151	35800	61.74							172	25300	63.3	162	25300	147.22
																			113	25300	7	151	35800	68.99							172	25300	80.93	162	25300	153.42
																			113	25300	142.42	151	35800	82.82							172	25300	86.85	162	25300	162.26
																			113	25300	154.3	151	35800	100.38							172	25300	94.68	162	25300	169.4
																			113	25300	161.63	151	35800	130.67							172	25300	102.03	162	25300	230.67
																			113	25300	165.95	151	35800	237.42							172	25300	111.81	162	25300	233.58
																			113	25300	168.58	152	35800	119.2							172	25300	129.21	162	25300	238.18
																			113	25300	172.21	152	35800	222.9							175	35800	21.16	162	25300	243.67
																			113	25300	177.37	153	35800	1.75							175	35800	39.06	162	25300	248.55
																			113	25300	181.9	153	35800	38.55							175	35800	42.72	163	35800	20.89
																			113	25300	203.84	154	25300	71.02							175	35800	57.23	163	35800	23.57
																			114	25300	168.34	154	25300	98.1							175	35800	69.39	165	35800	184.18
																			115	25300	17.94	154	25300	114.86							175	35800	72.35	165	35800	190.69
																			115	25300	157.72	155	35800	9.08							175	35800	85.9	165	35800	197.33
																			115	25300	163.07	155	35800	41.05							175	35800	89.71	165	35800	201.56
																			115	25300	169.78	155	35800	233.63							175	35800	95.75	165	35800	207.68
																			115	25300	174.35	156	35800	2.56							175	35800	98.38	165	35800	223.89
																			115	25300	178.32	156	35800	10.14							175	35800	101.05	167	35800	176.92
																			115	25300	187.29	156	35800	15.94							175	35800	141.98	167	35800	181.56
																			115	25300	215.11	156	35800	26.7							180	35800	14.86	167	35800	194.14
																			115	25300	221.97	156	35800	37.15							180	35800	18.3	167	35800	200.45
																			116	25300	2.56	156	35800	77.51							180	35800	22.51	167	35800	208.95
																			116	25300	106.06	157	35800	98.5							180	35800	33.28	167	35800	215.62
																			116	25300	109.55	157	35800	235.36							180	35800	36.98	167	35800	229.83
																			116	25300	117.36	158	35800	3.63							180	35800	46.12	169	35800	242.8
																			116	25300	129.69	158	35800	24.98							180	35800	51.5	171	35800	31.72
																			116	25300	152.06	158	35800	52.8							180	35800	60.95	171	35800	63.46
																			116	25300	164.89	158	35800	74.26							180	35800	78.77	171	35800	66.1
																			117	25300	155.58	158	35800	116.25							180	35800	83.57	171	35800	71.43
																			117	25300	242.3	159	35800	48.03							180	35800	92.83	171	35800	74.23
																			118	25300	219.94	159	35800	66.99							180	35800	156.82	171	35800	77
																			118	25300	242.44	159	35800	94.19							181	25300	80.02	171	35800	83.07
																			119	25300	21.16	159	35800	102.84							181	25300	99.53	171	35800	85.7
																			119	25300	104.44	159	35800	108.57							181	25300	112.05	171	35800	90.62
																			119	25300	119.73	159	35800	113							183	25300	114.86	171	35800	95.4
																			119	25300	127.8	159	35800	119.97							183	25300	153.35	171	35800	99.95
																			119	25300	172.1	159	35800	146.28							183	25300	164.73	171	35800	102.63
																			120	35800	15.65	159	35800	156.6							183	25300	170.86	171	35800	110.49
																			120	35800	27.74	160	35800	171.57							183	25300	175.74	171	35800	113.18
																			120	35800	35.96	160	35800	192.2							183	25300	180.62	171	35800	118.38
																			120	35800	41.59	160	35800	195.23							183	25300	183.83	171	35800	127.18
																			120	35800	47.65	160	35800	206.63							183	25300	186.65	171	35800	137.22
																			120	35800	104.27	160	35800	215.77							183	25300	199.55	171	35800	156.03
																			121	25300	206.56	160	35800	222.65							183	25300	213.05	171	35800	167.1
																			122	25300	107.97	161	35800	232.15							183	25300	215.68	171	35800	180.31
																			122	25300	175.03	162	35800	222.22							183	25300	234.41	172	35800	245.43
																			122	25300	191.17	162	35800	228.94							183	25300	238	173	35800	1.58
																			122	25300	232.34	163	35800	20.9							183	25300	247.54	173	35800	7.1
																			123	25300	3.08	163	35800	30.71							184	25300	7.02	173	35800	14.16
																			123	25300	9.05	163	35800	63.95							184	25300	14.93	173	35800	32.03
																			123	25300	102.93	164	35800	33.58							185	25300	84.7	173	35800	46.12
																			123	25300	240.98	164	35800	192.47							185	25300	100.93	173	35800	77.56
																			124	35800	26.91	164	35800	206.66							185	25300	105.94	174	35800	76.75
																			124	35800	34.95	164	35800	224.32							185	25300	109.52	174	35800	82.18
																			124	35800	54.31	164	35800	242.91							185	25300	118.74	174	35800	94.65
																			124	35800	66.4	165	35800	41.51							185	25300	142.11	174	35800	97.96
																			124	35800	71.64	165	35800	139.51							185	25300	159.66	174	35800	133.23
																			124	35800	97.34	166	35800	29.55							185	25300	162.29	174	35800	160
																			124	35800	106.08	166	35800	209.58							185	25300	185.76	174	35800	181.59
																			124	35800	109.68	167	35800	13.76							189	25300	23.41	174	35800	198.68
																			124	35800	149.11	167	35800	37.72							189	25300	155.67	174	35800	219.54
																			124	35800	172.85	167	35800	57.69							189	25300	177.69	175	35800	187.14
																			124	35800	210.13	167	35800	104.55							189	25300	180.47	175	35800	190.53
																			125	25300	56.27	167	35800	129.48							189	25300	195.56	175	35800	193.49
																			125	25300	130.18	167	35800	137.68							189	25300	206.92	175	35800	197.57
																			125	25300	143.56	167	35800	197.8							189	25300	209.98	175	35800	200.37
																			125	25300	155.21	168	35800	150.25							189	25300	213.32	175	35800	207.39
																			125	25300	164.36	168	35800	158.53							191	25300	178.92	175	35800	211.63
																			125	25300	224.71	168	35800	173.55							192	25300	26.21	175	35800	214.38
																			125	25300	247.16	169	35800	102.58							192	25300	54.73	175	35800	220.25
																			126	25300	79.97	169	35800	222.03							192	25300	69.1	177	25300	12.1
																			126	25300	140.33	170	35800	48.97							192	25300	79.25	177	25300	20.08
																			127	25300	72.77	170	35800	82.11							192	25300	82.46	177	25300	27.59
																			127	25300	98.42	170	35800	86.24							192	25300	87.86	177	25300	35.78
																			128	25300	73.17	170	35800	89.47							192	25300	98.59	177	25300	43
																			128	25300	78.81	170	35800	94.83							192	25300	110.26	177	25300	93.67
																			128	25300	100.24	170	35800	101.1							192	25300	113.01	177	25300	99.15
																			128	25300	125.6	170	35800	105.33							192	25300	141.43	177	25300	106.63
																			128	25300	175.16	170	35800	121.54							192	25300	144.96	177	25300	116.91
																			128	25300	192.02	170	35800	141.68							192	25300	164.31	180	35800	71.17
																			128	25300	214.69	170	35800	232.48							194	35800	13.24	181	35800	14.92
																			128	25300	237.19	172	35800	169.78							194	35800	16.15	181	35800	23.96
																			128	25300	248.72	172	35800	175.91							194	35800	32.72	181	35800	30.33
																			129	25300	12.08	172	35800	180.26							194	35800	38.52	181	35800	37.62
																			129	25300	23.96	172	35800	184.48							194	35800	43.78	181	35800	43.34
																			130	25300	127.47	172	35800	194.42							194	35800	46.41	181	35800	53.02
																			130	25300	167.46	172	35800	227.17							194	35800	52.89	181	35800	57.99
																			130	25300	227.42	173	35800	185.36							194	35800	58.53	181	35800	71.78
																			131	25300	8.65	174	35800	73.55							194	35800	61.55	181	35800	76.48
																			131	25300	14.67	174	35800	80.11							194	35800	64.36	181	35800	87.23
																			131	25300	25.69	174	35800	100.11							194	35800	71.38	184	25300	12.09
																			131	25300	65.1	174	35800	131.9							194	35800	85.01	184	25300	17.2
																			131	25300	91.36	174	35800	188.99							194	35800	92.17	184	25300	27.94
																			131	25300	140.25	174	35800	205.17							194	35800	102.96	184	25300	44.7
																			131	25300	192.37	174	35800	213.34							194	35800	113.83	184	25300	53.67
																			131	25300	200.14	174	35800	225.96							194	35800	122.25	184	25300	110.71
																			131	25300	222.71	174	35800	238.88							195	25300	209.58	184	25300	133.39
																			132	25300	36.22	175	35800	190.37							197	25300	58.27	184	25300	137.2
																			132	25300	177.74	175	35800	207.57							197	25300	62.6	187	35800	45.35
																			132	25300	218.05	175	35800	225.38							197	25300	66.9	187	35800	55.22
																			132	25300	226.42	176	25300	12.06							197	25300	71.02	187	35800	66.42
																			133	25300	14.41	176	25300	16.75							197	25300	73.66	187	35800	71.76
																			133	25300	29.71	176	25300	22.68							197	25300	76.43	189	35800	183.56
																			133	25300	144.2	176	25300	38.53							197	25300	87.05	189	35800	188.35
																			133	25300	207.54	176	25300	64.3							197	25300	122.78	189	35800	192.59
																			133	25300	214.98	178	35800	49.18							198	25300	207.06	189	35800	201.02
																			133	25300	237.94	178	35800	80.16							198	25300	215.72	192	25300	18.83
																			134	35800	2.01	178	35800	89.5							198	25300	221.78	192	25300	25.15
																			134	35800	23.1	178	35800	101.46							198	25300	226.95	192	25300	29.93
																			134	35800	29.46	178	35800	191.09							198	25300	235.05	192	25300	35.35
																			134	35800	37.79	178	35800	204.73							198	25300	241.4	192	25300	64.09
																			134	35800	51.21	178	35800	243.58							198	25300	246.09	192	25300	67.68
																			134	35800	69.13	179	35800	210.57							198	25300	249.99	192	25300	71.59
																			135	25300	6.67	179	35800	217.07							199	25300	13.56	192	25300	78.1
																			135	25300	13.91	179	35800	222.35							199	25300	16.51	192	25300	107.22
																			135	25300	20.53	179	35800	226.3							200	25300	90.76	192	25300	112.65
																			135	25300	27.15	179	35800	232.64							200	25300	95.67	192	25300	124.47
																			135	25300	43.85	179	35800	238.82							200	25300	101.9	192	25300	151.19
																			136	25300	4.87	179	35800	241.45							200	25300	104.53	192	25300	155.94
																			136	25300	83.72	180	35800	3.66							200	25300	109.9	195	35800	37.55
																			136	25300	108.29	180	35800	10.49							200	25300	120.66	195	35800	46.37
																			136	25300	131.12	180	35800	23.8							200	25300	143.86	195	35800	54.11
																			137	25300	38.68	180	35800	36.9							200	25300	147.91	195	35800	70.97
																			137	25300	53.93	180	35800	43.67							200	25300	153.9	195	35800	80.51
																			137	25300	62.81	181	25300	11.46							200	25300	170.71	195	35800	96.34
																			137	25300	144.33	182	35800	4.1							201	25300	235.64	195	35800	125.11
																			137	25300	240.95	182	35800	12.88							205	25300	48.34	195	35800	158.19
																			138	25300	17.96	182	35800	20.21							205	25300	134.65	195	35800	178.72
																			138	25300	49.23	182	35800	33.75							205	25300	186.23	195	35800	192.98
																			138	25300	111.17	182	35800	42.47							205	25300	190.01	195	35800	211.56
																			138	25300	134.96	182	35800	74.14							205	25300	196.01	195	35800	214.22
																			138	25300	149.35	183	35800	72.3							205	25300	199.9	195	35800	245.91
																			139	35800	17.9	183	35800	126.84							205	25300	202.54	197	25300	22.48
																			139	35800	27.81	183	35800	169.08							205	25300	206.12	197	25300	30.22
																			139	35800	33.99	183	35800	199.64							205	25300	208.94	197	25300	34.99
																			139	35800	39.63	184	35800	130.33							205	25300	217.51	197	25300	42.06
																			139	35800	51.67	184	35800	179.91							205	25300	223.21	197	25300	47.98
																			139	35800	60	184	35800	196.95							205	25300	230.37	197	25300	61.93
																			139	35800	68.16	184	35800	206.9							205	25300	234.39	197	25300	66.5
																			139	35800	248.36	184	35800	215.45							205	25300	242.39	197	25300	69.48
																			140	25300	205.08	184	35800	249.19							206	25300	13.72	197	25300	83.49
																			140	25300	238.53	185	25300	7.76							206	25300	19.54	197	25300	93.17
																			140	25300	249.02	185	25300	12.07							207	25300	196.19	197	25300	104.49
																			141	25300	25.89	185	25300	18.53							208	35800	12.97	197	25300	108.73
																			141	25300	100	185	25300	44.99							208	35800	15.6	197	25300	112.92
																			141	25300	104.04	185	25300	77.81							208	35800	18.85	197	25300	117.39
																			141	25300	190.58	187	35800	30.92							208	35800	23.39	197	25300	120.28
																			141	25300	201.17	187	35800	45.94							208	35800	31.37	197	25300	132.55
																			141	25300	249.86	187	35800	57.73							208	35800	40.25	197	25300	155.19
																			142	25300	124.03	187	35800	85.5							208	35800	42.88	197	25300	190.03
																			142	25300	129.23	187	35800	114.66							208	35800	46.27	197	25300	201.85
																			142	25300	132.09	187	35800	121.1							208	35800	49.79	197	25300	215.18
																			142	25300	140.62	187	35800	128.75							208	35800	53.47	198	35800	76.9
																			142	25300	146.82	187	35800	152.19							208	35800	82.98	198	35800	84.57
																			142	25300	150.77	188	35800	81.75							208	35800	89.54	198	35800	101.78
																			142	25300	153.76	188	35800	98.85							208	35800	98.09	199	35800	20.06
																			142	25300	159.87	188	35800	110.45							208	35800	100.98	199	35800	130.88
																			142	25300	164.05	188	35800	151.75							208	35800	103.95	200	35800	59.33
																			142	25300	171.74	188	35800	169.77							208	35800	146.25	200	35800	64.26
																			142	25300	175.58	189	35800	108.18							208	35800	158.52	200	35800	71.13
																			142	25300	179.96	189	35800	121.34							209	25300	198.72	200	35800	74.09
																			142	25300	185.65	189	35800	130.92							209	25300	222.1	200	35800	78.04
																			142	25300	210.94	189	35800	136.03							210	25300	161.21	200	35800	80.93
																			142	25300	225.4	189	35800	143.54							210	25300	166.83	200	35800	91.68
																			143	25300	247.23	189	35800	150.74							210	25300	170.31	201	25300	12.58
																			144	25300	14.31	189	35800	160.1							210	25300	179.49	201	25300	40.74
																			144	25300	20.23	189	35800	178.81							210	25300	182.12	201	25300	46.99
																			144	25300	32.6	191	25300	13.41							210	25300	191.46	201	25300	49.82
																			144	25300	88.6	191	25300	20.36							210	25300	206.99	201	25300	64.87
																			144	25300	112.76	191	25300	26.58							212	35800	31.47	204	35800	128.97
																			144	25300	155.03	191	25300	89.73							212	35800	241.08	204	35800	174.6
																			144	25300	164.64	191	25300	115.77							212	35800	247.63	204	35800	185.28
																			144	25300	221.15	192	35800	35.88							213	25300	7.66	206	35800	15.56
																			144	25300	242.52	192	35800	71.42							213	25300	13.24	206	35800	28.71
																			145	25300	100.15	192	35800	235.28							213	25300	17.3	206	35800	36.92
																			145	25300	160.87	192	35800	243.17							213	25300	30.75	206	35800	39.84
																			145	25300	166.98	193	35800	53.69							213	25300	55.88	206	35800	52.44
																			145	25300	180.26	193	35800	146.24							213	25300	72.32	209	35800	52.99
																			145	25300	190.08	193	35800	232.92							214	25300	192.08	212	35800	119.13
																			145	25300	194.9	194	35800	0.01							216	35800	42.44	212	35800	158.63
																			145	25300	197.95	194	35800	60.5							216	35800	135.29	212	35800	222.68
																			145	25300	201.51	194	35800	214.1							216	35800	138.86	212	35800	226.63
																			145	25300	220.91	194	35800	235.35							216	35800	146.06	212	35800	234.49
																			146	25300	116.46	194	35800	248.54							216	35800	148.69	212	35800	237.3
																			147	25300	68.45	195	25300	14.75							216	35800	154.43	213	35800	18.99
																			147	25300	77.46	195	25300	19.03							216	35800	173	213	35800	30.06
																			147	25300	85.63	196	35800	231.19							216	35800	176.34	213	35800	151.97
																			147	25300	97.39	197	35800	10.56							216	35800	179.93	213	35800	216.81
																			148	25300	28.69	197	35800	50.17							216	35800	183.04	213	35800	219.49
																			148	25300	75.67	197	35800	56.21							216	35800	186.44	213	35800	225.3
																			148	25300	91.96	197	35800	82.67							216	35800	190.58	213	35800	227.98
																			148	25300	97.7	198	35800	102.33							216	35800	208.74	213	35800	230.79
																			148	25300	147.44	198	35800	119.63							216	35800	212.03	213	35800	235.9
																			148	25300	194.18	199	35800	4.11							216	35800	214.91	213	35800	245.92
																			148	25300	201.56	199	35800	26.59							216	35800	222.91	214	35800	1.03
																			149	25300	117.68	200	35800	28.79							216	35800	227.14	214	35800	14.67
																			149	25300	129.73	200	35800	107.72							222	25300	188.89	214	35800	23.54
																			149	25300	168.07	200	35800	163.83							223	25300	59.72	214	35800	33.83
																			149	25300	177.54	200	35800	195.83							223	25300	73.74	214	35800	36.87
																			149	25300	196.1	201	35800	43.48							223	25300	80.75	214	35800	56.47
																			149	25300	202.4	201	35800	157.51							223	25300	94.84	215	35800	58.98
																			149	25300	219.65	201	35800	165.01							223	25300	116.66	215	35800	62.45
																			149	25300	242.74	201	35800	174.87							223	25300	120.48	215	35800	65.37
																			150	25300	41.5	201	35800	184.06							223	25300	130.75	215	35800	69.09
																			151	25300	132.73	201	35800	192.15							223	25300	138.84	215	35800	75.42
																			151	25300	146.27	201	35800	199.99							223	25300	154.69	215	35800	78.98
																			151	25300	159.11	201	35800	212.77							228	25300	87.13	215	35800	82.28
																			151	25300	172.93	201	35800	231.51							228	25300	101.09	215	35800	92.19
																			152	25300	143.53	202	35800	2.88							228	25300	130.99	215	35800	96.12
																			152	25300	228.14	202	35800	194.52							229	25300	102.49	215	35800	98.95
																			152	25300	234.38	202	35800	219.44							229	25300	105.12	215	35800	113.85
																			153	25300	42.6	203	35800	105.24							229	25300	108.34	215	35800	116.55
																			153	25300	57.87	203	35800	108.53							229	25300	111.52	215	35800	120.08
																			153	25300	62.67	203	35800	112.65							229	25300	118.28	215	35800	133.02
																			153	25300	73.07	203	35800	117.19							229	25300	121.27	215	35800	136.09
																			153	25300	78.96	203	35800	122.44							229	25300	137.59	215	35800	147.09
																			153	25300	87.67	203	35800	131.67							229	25300	142.62	217	35800	4.37
																			153	25300	91.3	203	35800	137.25							229	25300	145.25	219	35800	137.59
																			153	25300	94.96	204	35800	32.55							229	25300	150.04	221	25300	12.07
																			153	25300	98.56	204	35800	56.23							229	25300	153.52	221	25300	15.21
																			153	25300	104.03	204	35800	82.99							229	25300	160.7	221	25300	17.99
																			153	25300	118.36	204	35800	93.21							231	25300	132.38	221	25300	23.53
																			153	25300	162.35	204	35800	104.8							231	25300	140.51	221	25300	33.5
																			153	25300	172.93	205	35800	27.7							232	25300	21.21	221	25300	40.98
																			154	25300	194.08	205	35800	161.03							232	25300	27.46	221	25300	48.34
																			154	25300	236.04	206	35800	5.92							232	25300	34.39	221	25300	52.2
																			156	25300	29.44	206	35800	81.68							232	25300	79.71	221	25300	56.38
																			156	25300	108.39	206	35800	109.28							232	25300	92.22	221	25300	73.58
																			156	25300	130.99	206	35800	193.78							232	25300	101.9	221	25300	110.34
																			156	25300	146.34	206	35800	222.03							237	25300	43.67	224	35800	8.89
																			156	25300	175.21	207	35800	60.01							237	25300	46.34	224	35800	18.66
																			156	25300	185.08	207	35800	65.8							237	25300	50.9	224	35800	22.75
																			156	25300	216.98	207	35800	68.55							237	25300	55.43	224	35800	28.97
																			156	25300	244.2	207	35800	77.03							237	25300	59.78	224	35800	33.33
																			157	25300	7.51	207	35800	84.44							237	25300	62.9	224	35800	60.05
																			157	25300	70.72	207	35800	91.57							237	25300	66.51	227	25300	12.73
																			157	25300	118.12	207	35800	99.36							237	25300	70.76	227	25300	59.71
																			158	25300	34.29	207	35800	110.33							237	25300	79.02	227	25300	117.91
																			158	25300	62.65	207	35800	127.56							237	25300	90.15	227	25300	130.51
																			158	25300	80.47	207	35800	152.33							237	25300	106.22	227	25300	134.94
																			158	25300	147.06	209	35800	63.15							237	25300	132.33	227	25300	143.41
																			158	25300	181.5	209	35800	69.47							237	25300	243.7	227	25300	151.16
																			159	25300	147.49	209	35800	88.31							239	25300	87.6	227	25300	158.39
																			159	25300	171.64	209	35800	111.8							239	25300	117.49	227	25300	161.2
																			159	25300	204.08	210	25300	11.94							240	25300	247.05	227	25300	168.02
																			159	25300	225.12	210	25300	14.86							241	25300	15.89	227	25300	191.03
																			160	25300	60.94	210	25300	33.39							241	25300	40.72	227	25300	193.66
																			160	25300	69.06	210	25300	48.36							241	25300	49.68	227	25300	232.81
																			160	25300	76.14	210	25300	100.8							241	25300	61.86	227	25300	238.24
																			160	25300	79.7	210	25300	110.38							243	25300	47.18	228	35800	0.37
																			160	25300	82.33	210	25300	115.98							243	25300	49.81	228	35800	87.01
																			160	25300	86.57	210	25300	123.28							243	25300	53.01	228	35800	90.73
																			160	25300	91.56	210	25300	130.35							243	25300	58.64	228	35800	126.87
																			160	25300	102.76	210	25300	135.84							243	25300	71.8	229	35800	62.85
																			160	25300	108.65	210	25300	147.93							243	25300	79.21	229	35800	69.13
																			161	25300	123.99	210	25300	153.54							243	25300	86.57	229	35800	74.1
																			161	25300	131.15	210	25300	157.68							243	25300	100.29	229	35800	77.58
																			161	25300	136.24	210	25300	185.98							243	25300	115.73	229	35800	80.73
																			161	25300	140.85	211	35800	190.64							243	25300	144.45	229	35800	83.36
																			161	25300	147.42	212	35800	77.4							244	25300	68.52	229	35800	86.3
																			161	25300	154.48	212	35800	184.8							244	25300	72.97	229	35800	90.83
																			161	25300	158.06	212	35800	203.18							244	25300	76.23	229	35800	93.46
																			161	25300	165.14	212	35800	224.51							244	25300	79.73	229	35800	100.75
																			161	25300	169.69	213	35800	8.01							244	25300	83.79	229	35800	103.64
																			161	25300	173.06	213	35800	11.12							244	25300	91.36	229	35800	110.56
																			161	25300	175.84	213	35800	29.66							244	25300	94.2	229	35800	119.76
																			161	25300	178.8	213	35800	33.79							244	25300	97.2	229	35800	122.51
																			161	25300	185.02	213	35800	43.1							244	25300	105.96	233	25300	10.81
																			161	25300	202.28	213	35800	56.75							244	25300	110.11	233	25300	15.93
																			161	25300	216.14	213	35800	69.28							244	25300	121.08	233	25300	18.78
																			161	25300	218.77	213	35800	77.06							244	25300	135.67	233	25300	26.65
																			161	25300	226.14	214	35800	92.82							244	25300	141.98	233	25300	43.27
																			162	25300	67.97	214	35800	109.76							244	25300	149.74	233	25300	51.63
																			162	25300	71.7	214	35800	132.2							244	25300	162.79	233	25300	108.24
																			162	25300	75.57	214	35800	179.44							244	25300	166.9	233	25300	133.88
																			162	25300	86.55	215	35800	137.87							246	35800	13.22	235	35800	81.46
																			162	25300	104.13	215	35800	152.14							246	35800	18.62	237	35800	119.96
																			162	25300	127.83	215	35800	160.28							246	35800	31.34	237	35800	122.87
																			162	25300	138.27	215	35800	170.81							246	35800	39.28	237	35800	127.86
																			162	25300	142.11	215	35800	185.54							246	35800	42.83	237	35800	130.78
																			162	25300	145.92	215	35800	215.78							246	35800	50.05	237	35800	134.25
																			162	25300	150.86	215	35800	221.64							246	35800	55.6	237	35800	140.33
																			162	25300	175.39	215	35800	233.65							249	25300	54.43	237	35800	145.89
																			162	25300	178.93	216	25300	0.98							249	25300	106.52	237	35800	171.22
																			162	25300	181.98	216	25300	11.56							251	35800	16.9	241	35800	29.21
																			162	25300	233.83	216	25300	14.42							251	35800	36.96	241	35800	114.45
																			162	25300	236.83	216	25300	20.2							251	35800	41.42	241	35800	117.11
																			164	25300	113.29	217	35800	210.38							251	35800	49.06	241	35800	124.48
																			165	25300	65.7	218	35800	16.48							251	35800	58.25	241	35800	127.69
																			165	25300	76.12	218	35800	63.73							251	35800	69.93	241	35800	133.4
																			165	25300	89.42	218	35800	81.2							251	35800	73.44	241	35800	142.81
																			165	25300	104.76	218	35800	169.51							251	35800	97.36	241	35800	151.01
																			165	25300	116.13	218	35800	184.89							254	25300	132.45	241	35800	157.42
																			165	25300	159.33	218	35800	190.5							254	25300	187.61	241	35800	173.3
																			165	25300	183.39	218	35800	198.37							254	25300	193.38	241	35800	192
																			166	35800	10.19	218	35800	206.37							254	25300	205.24	241	35800	213.99
																			166	35800	14.18	218	35800	220.68							254	25300	213.03	241	35800	232.71
																			166	35800	17.59	218	35800	236.46							254	25300	220.59	241	35800	248.69
																			166	35800	20.25	218	35800	246.7							254	25300	224.25	245	35800	191.09
																			166	35800	31.31	219	35800	10.66							256	25300	175.83	245	35800	209.67
																			166	35800	37.37	220	25300	12.25							256	25300	180.22	245	35800	221.92
																			166	35800	46.51	220	25300	24.27							256	25300	189.15	245	35800	227.14
																			166	35800	64.76	220	25300	193.01							256	25300	192.34	246	35800	4.5
																			168	25300	79.49	220	25300	212.68							256	25300	202.16	247	25300	89.71
																			168	25300	112.45	220	25300	229.29							257	35800	17.03	247	25300	109.35
																			168	25300	120.28	221	35800	2.65							257	35800	41.47	247	25300	124.28
																			168	25300	139.24	222	35800	35.59							257	35800	45.77	247	25300	128.9
																			170	25300	26.73	222	35800	76.78							257	35800	51.28	247	25300	135.18
																			170	25300	48.49	222	35800	131.13							257	35800	53.91	247	25300	138.54
																			170	25300	58.22	222	35800	239.1							257	35800	59.47	247	25300	144.71
																			170	25300	114.35	223	35800	123.28							257	35800	62.4	247	25300	164.76
																			170	25300	181.86	223	35800	150.01							257	35800	73.28	247	25300	189.07
																			170	25300	192.97	223	35800	154.28							257	35800	80.65	249	35800	218.67
																			170	25300	202.58	223	35800	159.68							257	35800	85.16	254	35800	152.06
																			170	25300	218.89	223	35800	163.76							257	35800	98.8	256	35800	231.15
																			170	25300	231.71	223	35800	166.89							261	25300	76.21	257	35800	5.89
																			171	25300	42.69	223	35800	192.38							261	25300	215.15	257	35800	37.89
																			171	25300	105.53	223	35800	208.52							262	25300	91.39	257	35800	43.18
																			172	25300	141.34	223	35800	220.12							262	25300	102.69	257	35800	55.31
																			172	25300	158.4	224	35800	2.37							262	25300	113.67	257	35800	62.56
																			172	25300	170.01	225	35800	49.84							262	25300	121.88	257	35800	69.27
																			172	25300	239.29	225	35800	93.78							262	25300	131.47	257	35800	92.15
																			173	25300	100.6	225	35800	118.5							262	25300	137.59	257	35800	101.82
																			173	25300	122.02	225	35800	169.49							262	25300	140.56	257	35800	108.19
																			173	25300	128.3	225	35800	186.44							264	25300	82.82	257	35800	115.28
																			174	35800	22.04	225	35800	189.12							266	25300	126.36	257	35800	136.75
																			174	35800	54.75	225	35800	215.41							266	25300	152.23	257	35800	158.83
																			174	35800	65.95	225	35800	226.43							267	25300	78.84	257	35800	166.72
																			174	35800	74.66	225	35800	241.19							267	25300	82.26	257	35800	173.7
																			174	35800	91.58	226	35800	3.75							267	25300	88.79	257	35800	180.36
																			174	35800	96.98	227	35800	177.51							267	25300	97.07	257	35800	198.51
																			174	35800	103.54	228	35800	44.49							267	25300	99.78	259	35800	58.66
																			174	35800	141.15	228	35800	186.47							267	25300	104.03	259	35800	63.65
																			175	25300	7.78	229	35800	160.81							267	25300	107.27	259	35800	70.86
																			175	25300	15.92	229	35800	178.11							267	25300	109.9	259	35800	89.6
																			175	25300	32.74	229	35800	204.23							267	25300	120.08	259	35800	111.2
																			175	25300	39.17	229	35800	218.44							267	25300	160.64	259	35800	144.94
																			175	25300	75.97	229	35800	228.47							269	35800	17.92	259	35800	148.64
																			175	25300	93.31	229	35800	234.82							269	35800	26.12	259	35800	157.6
																			175	25300	109.9	229	35800	238.33							269	35800	60.99	259	35800	227.62
																			175	25300	130.86	230	35800	7.97							271	25300	8.1	260	25300	11.63
																			176	25300	199.74	230	35800	56.15							271	25300	32.07	260	25300	19.85
																			176	25300	212.18	230	35800	246.36							272	25300	137.06	260	25300	127.88
																			176	25300	223.42	231	25300	11.39							274	25300	157.25	260	25300	135.19
																			176	25300	226.32	231	25300	15.64							274	25300	202.37	260	25300	166.23
																			176	25300	237.69	231	25300	69.15							274	25300	248	260	25300	169.87
																			177	25300	13.15	231	25300	88.16							275	25300	4.02	260	25300	239.98
																			177	25300	107.33	231	25300	169.81							275	25300	12.55	260	25300	249.8
																			177	25300	142.7	233	35800	42.65							275	25300	15.92	261	35800	11.35
																			177	25300	170.55	233	35800	78.27							275	25300	18.89	261	35800	76.02
																			177	25300	191.53	233	35800	87.98							275	25300	25.2	261	35800	83.99
																			177	25300	214.74	233	35800	109.09							275	25300	30.73	261	35800	86.63
																			177	25300	236.81	233	35800	139.23							275	25300	50.02	261	35800	102.38
																			177	25300	249.3	233	35800	225.74							275	25300	59.27	261	35800	109.09
																			178	25300	76.37	233	35800	249.98							275	25300	65.91	261	35800	121.9
																			178	25300	155.16	234	35800	27.91							275	25300	82.57	261	35800	125.51
																			178	25300	208.96	235	35800	138.5							275	25300	95.78	261	35800	159.83
																			178	25300	214.82	235	35800	200.92							275	25300	99.28	261	35800	173.07
																			178	25300	222.34	235	35800	223.25							277	35800	13.4	266	35800	109.23
																			178	25300	227.76	235	35800	242.7							277	35800	16.56	266	35800	181.82
																			178	25300	235.62	236	25300	7.46							277	35800	28.22	266	35800	249.77
																			178	25300	240.97	236	25300	11.15							277	35800	31.64	267	35800	110.01
																			179	25300	11.93	236	25300	14.87							277	35800	34.8	267	35800	113
																			179	25300	31.3	236	25300	17.5							277	35800	40.64	267	35800	115.63
																			179	25300	74.06	236	25300	23.46							277	35800	49.21	267	35800	118.31
																			180	25300	52.7	236	25300	27.7							277	35800	58.17	267	35800	120.97
																			180	25300	174.41	237	35800	22.59							277	35800	69.17	267	35800	124.71
																			180	25300	190.2	237	35800	41.12							277	35800	78.52	267	35800	130.73
																			181	25300	171.11	238	35800	9.32							277	35800	89.57	267	35800	136.8
																			182	25300	0.75	238	35800	46.79							279	25300	126.77	267	35800	146.42
																			182	25300	49.52	238	35800	84.14							279	25300	139.23	267	35800	165.37
																			182	25300	62.36	238	35800	190.87							279	25300	147.21	273	35800	123.69
																			182	25300	80.1	238	35800	209.19							284	35800	15.43	273	35800	129.08
																			182	25300	138.51	239	35800	174.41							284	35800	18.23	273	35800	132.27
																			182	25300	148.15	239	35800	181.28							284	35800	25.71	273	35800	134.9
																			182	25300	164.82	239	35800	202.7							284	35800	35.92	273	35800	138.4
																			182	25300	195.75	239	35800	215.25							284	35800	45.93	273	35800	145.57
																			182	25300	232.26	239	35800	218							284	35800	48.56	273	35800	149.01
																			183	25300	122.28	239	35800	221.09							284	35800	58.42	273	35800	155.64
																			183	25300	148.43	239	35800	238.37							284	35800	67.36	273	35800	160.83
																			183	25300	233.45	240	35800	1.85							284	35800	76.99	273	35800	186.32
																			184	25300	4.66	240	35800	31.25							284	35800	92.05	273	35800	202.46
																			184	25300	88.3	241	35800	33.21							284	35800	118.18	273	35800	238.22
																			185	25300	2.67	241	35800	64.25							284	35800	126.77	273	35800	241.08
																			185	25300	30.85	241	35800	68.03							284	35800	137.82	274	35800	8.88
																			185	25300	52.15	241	35800	76.05							286	25300	46	276	35800	110.04
																			185	25300	153.89	241	35800	85.02							286	25300	57.84	276	35800	245.33
																			185	25300	189.29	241	35800	99.06							286	25300	88.42	277	35800	3.41
																			186	25300	156.03	241	35800	106.6							286	25300	93.95	277	35800	9.49
																			186	25300	158.7	242	35800	26.87							286	25300	106.92	277	35800	20.81
																			186	25300	162.01	242	35800	130.29							286	25300	128.52	277	35800	27.31
																			186	25300	166.25	243	35800	98.83							286	25300	131.56	277	35800	39.19
																			186	25300	180.2	243	35800	104.3							286	25300	134.93	277	35800	49.99
																			186	25300	201.13	243	35800	108.03							287	25300	144.5	277	35800	53.68
																			186	25300	247.14	243	35800	141.17							287	25300	150.36	277	35800	62.56
																			188	25300	123.69	243	35800	168.47							287	25300	162.8	277	35800	74.87
																			189	25300	115.78	243	35800	191.2							287	25300	168.21	278	25300	12.05
																			189	25300	127.4	244	35800	191.76							287	25300	173.94	278	25300	30.92
																			189	25300	139.49	245	35800	175.27							287	25300	180.06	278	25300	34.07
																			189	25300	185.84	245	35800	186.8							287	25300	186.09	278	25300	38.06
																			190	25300	6.7	245	35800	194.31							287	25300	195.83	278	25300	51.27
																			190	25300	95.1	246	35800	51.02							287	25300	213.69	278	25300	58.44
																			190	25300	134.08	246	35800	72.25							287	25300	247.24	278	25300	64.96
																			190	25300	158.31	247	35800	116.93							288	35800	6.76	278	25300	75.31
																			190	25300	182.98	247	35800	137.02							288	35800	13.13	278	25300	80.67
																			190	25300	189.43	247	35800	187.49							288	35800	15.8	278	25300	97.34
																			191	25300	137.27	247	35800	196.52							288	35800	19.58	278	25300	99.97
																			191	25300	161.19	247	35800	208.88							288	35800	41.83	278	25300	102.98
																			191	25300	167.44	247	35800	211.67							289	25300	88.42	278	25300	107.91
																			191	25300	181.94	247	35800	228.02							289	25300	100.02	278	25300	113.94
																			191	25300	189.58	247	35800	232.73							289	25300	103.88	278	25300	169.58
																			191	25300	193.92	247	35800	239.93							289	25300	120.19	278	25300	174.8
																			191	25300	207.98	247	35800	246.49							289	25300	125.43	282	35800	137.34
																			193	25300	2.98	247	35800	249.3							289	25300	164.81	282	35800	140.3
																			193	25300	173	248	35800	5.5							289	25300	183.53	282	35800	145.25
																			193	25300	199.44	248	35800	16.05							289	25300	201.44	282	35800	151.88
																			193	25300	206.83	248	35800	48.98							289	25300	208.51	282	35800	158.11
																			193	25300	215.91	250	35800	62.67							294	25300	29	282	35800	162.96
																			193	25300	228.6	250	35800	101.9							294	25300	32.18	282	35800	170.24
																			194	35800	18.98	250	35800	123.29							294	25300	37.52	282	35800	175.33
																			194	35800	22.35	250	35800	177.65							294	25300	48.14	282	35800	180.66
																			194	35800	29.7	250	35800	196.42							294	25300	62.68	282	35800	201.9
																			194	35800	35.8	250	35800	221.51							294	25300	66.5	282	35800	238.99
																			194	35800	41.94	252	35800	4.15							294	25300	72.71	283	35800	1.38
																			194	35800	48.09	252	35800	140.81							296	35800	12.68	285	35800	41.59
																			194	35800	55.07	252	35800	184.83							296	35800	17.38	285	35800	49.33
																			194	35800	87.23	252	35800	205.04							296	35800	37.74	285	35800	59.12
																			194	35800	146.4	252	35800	247.19							296	35800	41.96	285	35800	66.57
																			195	25300	117.32	253	35800	71.11							296	35800	57.81	285	35800	73.38
																			195	25300	126.66	253	35800	120.93							296	35800	69.55	285	35800	78.33
																			195	25300	140.8	253	35800	130.56							296	35800	75.39	285	35800	82.99
																			195	25300	201.86	253	35800	141.69							296	35800	96.28	287	25300	21.82
																			196	25300	64.4	253	35800	150.21							296	35800	102.24	287	25300	32.53
																			196	25300	81.94	253	35800	189.27							296	35800	108.16	287	25300	39.78
																			196	25300	91.55	253	35800	208.13							298	25300	18.98	287	25300	72.21
																			196	25300	105.26	253	35800	231.43							298	25300	36.93	290	35800	105.1
																			196	25300	248.33	254	35800	15.17							298	25300	48.32	290	35800	111.61
																			197	25300	11.35	255	35800	142.57							298	25300	57.96	290	35800	126.6
																			197	25300	26.36	255	35800	196.34							298	25300	61.32	290	35800	130.43
																			197	25300	37.76	255	35800	210.07							298	25300	66.33	290	35800	134.59
																			197	25300	154.57	255	35800	216.5							298	25300	73.11	290	35800	163.83
																			197	25300	180.59	255	35800	232							298	25300	75.74	290	35800	168.89
																			197	25300	190.81	256	25300	11.19							298	25300	82.39	290	35800	177.76
																			197	25300	197.89	256	25300	19.61							298	25300	85.3	292	35800	226.68
																			197	25300	202.37	256	25300	22.65							298	25300	88.85	294	35800	187.22
																			197	25300	210.55	256	25300	41.12							298	25300	100.45	294	35800	227.72
																			197	25300	215.15	256	25300	118.01							300	25300	38.64	295	35800	7.99
																			197	25300	221.4	256	25300	135.14							300	25300	42.16	295	35800	26.86
																			197	25300	224.56	258	35800	32.04							300	25300	55.91	295	35800	55.45
																			197	25300	235.55	258	35800	71.99							300	25300	62.31	295	35800	65.56
																			197	25300	244.7	258	35800	98.73							300	25300	66.72	295	35800	85.22
																			198	25300	7.46	258	35800	204.66							300	25300	70.1	297	25300	12.46
																			198	25300	35.96	259	35800	189.1							300	25300	79.6	297	25300	18.82
																			199	25300	45.07	259	35800	205.04							300	25300	83.57	297	25300	23.26
																			199	25300	81.04	259	35800	210.47							300	25300	198.4	297	25300	28.33
																			199	25300	212.36	259	35800	239.71							301	35800	13.73	297	25300	31.67
																			199	25300	224.2	260	35800	0.66							301	35800	17.13	297	25300	34.94
																			199	25300	244.71	261	35800	16.36							301	35800	24.3	297	25300	43.04
																			200	25300	1.3	261	35800	49.68							301	35800	32.79	297	25300	52.15
																			200	25300	31.31	261	35800	126.2							301	35800	37.76	297	25300	57.93
																			200	25300	55.79	261	35800	142.54							301	35800	51.52	297	25300	66.65
																			200	25300	86.35	261	35800	151.54							301	35800	57.48	297	25300	70.67
																			200	25300	187.49	261	35800	172.17							301	35800	60.5	297	25300	78.15
																			200	25300	205.56	261	35800	192.95							301	35800	65.57	297	25300	89.83
																			201	25300	150.21	264	25300	12.53							301	35800	71.41	297	25300	127.25
																			201	25300	154.32	264	25300	18.19							301	35800	77.33	297	25300	132.79
																			201	25300	158.16	264	25300	21.29							301	35800	80.46	297	25300	162.6
																			201	25300	166.15	264	25300	30.56							301	35800	107.12	297	25300	200
																			201	25300	172.05	264	25300	62.48							304	25300	229.83	299	35800	21.66
																			201	25300	176.63	264	25300	89.7							304	25300	232.6	299	35800	25.72
																			201	25300	181.71	266	35800	73.74							304	25300	235.65	299	35800	32.36
																			201	25300	187.45	266	35800	100.47							304	25300	240.27	299	35800	37.33
																			201	25300	190.46	267	35800	27.11							304	25300	242.99	299	35800	41.25
																			201	25300	233.58	267	35800	43.9							305	35800	0.23	299	35800	43.95
																			202	25300	215.76	267	35800	50.29							305	35800	5.37	299	35800	48.42
																			202	25300	224.99	267	35800	77.45							305	35800	10.42	299	35800	65.61
																			203	35800	19.22	268	25300	12.25							305	35800	14.43	299	35800	73.71
																			203	35800	25.53	268	25300	15.84							305	35800	19.11	299	35800	92.29
																			203	35800	30.24	268	25300	24.39							305	35800	40.55	299	35800	100.68
																			203	35800	37.92	268	25300	43.08							305	35800	55.65	299	35800	117.38
																			203	35800	45.73	268	25300	47.62							305	35800	66.8	301	35800	222.87
																			203	35800	67.56	268	25300	51.96							305	35800	81.41	301	35800	227.2
																			203	35800	97.47	268	25300	74.79							305	35800	87	301	35800	234.73
																			204	25300	52.34	268	25300	80.99							305	35800	91.7	301	35800	240.13
																			205	25300	18.29	268	25300	95.89							305	35800	94.37	301	35800	244.82
																			205	25300	27.19	268	25300	107.61							305	35800	100.82	301	35800	248.51
																			205	25300	41.26	268	25300	121.54							305	35800	103.46	302	35800	7.41
																			205	25300	44.64	268	25300	126.17							305	35800	106.6	302	35800	11.22
																			205	25300	54.7	270	35800	42.3							305	35800	110.66	302	35800	20.27
																			205	25300	64.93	270	35800	121.01							305	35800	116.55	302	35800	37.46
																			205	25300	70.7	271	35800	119.14							305	35800	119.71	304	35800	75.58
																			205	25300	91.8	271	35800	148.13							305	35800	127.23	304	35800	87.58
																			205	25300	109.7	271	35800	163.38							307	25300	182.07	304	35800	92.57
																			205	25300	113.66	271	35800	189.54							307	25300	205.52	304	35800	101.63
																			205	25300	119.21	272	35800	70.63							308	25300	59.22	304	35800	104.4
																			205	25300	123.06	272	35800	129.35							308	25300	67.02	305	35800	180.22
																			205	25300	125.87	272	35800	151.53							308	25300	71.71	306	25300	11.58
																			205	25300	140.26	273	35800	19.12							308	25300	88.61	306	25300	27.69
																			207	25300	84.08	273	35800	43.67							308	25300	98.12	306	25300	41.35
																			207	25300	120.61	273	35800	69.72							308	25300	104.26	306	25300	60.52
																			207	25300	159.18	273	35800	78.88							308	25300	150.81	306	25300	114.76
																			207	25300	177.45	273	35800	88.97							308	25300	158.66	306	25300	117.69
																			207	25300	191.44	273	35800	113.78							311	25300	72.5	306	25300	121.39
																			207	25300	199.27	273	35800	170.36							311	25300	152.13	306	25300	124.33
																			207	25300	240.67	273	35800	182.87							312	25300	124.06	306	25300	128.57
																			208	25300	42.04	273	35800	190.76							312	25300	135.09	306	25300	138.14
																			209	25300	9.07	273	35800	227.22							312	25300	145.72	306	25300	150.31
																			209	25300	16.01	274	35800	89.59							312	25300	150.51	307	35800	237.49
																			209	25300	37.1	275	35800	176.38							312	25300	163.7	307	35800	240.2
																			209	25300	106.05	275	35800	179.02							312	25300	166.34	307	35800	243.12
																			209	25300	118.52	275	35800	186.25							312	25300	176.25	307	35800	248.16
																			209	25300	134.32	275	35800	189.13							312	25300	187.59	308	35800	2.42
																			209	25300	149.75	275	35800	196.52							312	25300	219.2	308	35800	5.29
																			209	25300	174.91	275	35800	201.44							313	25300	3.68	308	35800	11.23
																			209	25300	202.46	275	35800	224.38							313	25300	95.07	308	35800	21.78
																			210	25300	190.3	275	35800	229.65							313	25300	98.85	308	35800	45.24
																			210	25300	214.01	276	35800	5.69							313	25300	106.38	308	35800	73.28
																			210	25300	242.12	276	35800	44.24							313	25300	120.29	309	35800	147.22
																			211	25300	114.88	276	35800	63.88							313	25300	134.31	309	35800	164.82
																			211	25300	127.32	277	35800	184.13							313	25300	199.84	309	35800	174
																			211	25300	144.99	277	35800	187.97							317	25300	42.33	309	35800	177.03
																			211	25300	165.42	277	35800	194.86							317	25300	51.34	309	35800	184.87
																			211	25300	179.13	277	35800	197.96							317	25300	70.75	311	25300	12.42
																			212	35800	30.81	277	35800	223.09							317	25300	94.83	311	25300	19.26
																			212	35800	37.32	277	35800	237.46							317	25300	100.99	311	25300	26.55
																			212	35800	43.48	278	35800	216.61							317	25300	104.76	311	25300	63.42
																			212	35800	55.32	278	35800	230.66							317	25300	108.51	312	35800	23.39
																			212	35800	68.18	279	35800	233.56							317	25300	114.83	315	35800	169.17
																			212	35800	100.62	279	35800	248.6							317	25300	117.68	315	35800	174.8
																			213	25300	5.02	280	35800	12.94							317	25300	135.59	315	35800	188.4
																			213	25300	127.78	281	35800	63.69							317	25300	146.91	315	35800	195.33
																			213	25300	141.51	281	35800	83.74							317	25300	149.54	315	35800	200.05
																			213	25300	155.67	281	35800	96.66							317	25300	160.04	315	35800	205.75
																			214	25300	19.49	281	35800	100.14							317	25300	165.09	315	35800	208.96
																			214	25300	28.42	281	35800	114.76							317	25300	182.31	315	35800	221.36
																			214	25300	85.15	281	35800	125.4							318	35800	13.31	316	35800	2.58
																			214	25300	105.83	281	35800	157.36							318	35800	19.06	316	35800	7.72
																			214	25300	187.86	281	35800	177.47							318	35800	22.03	316	35800	11.93
																			214	25300	194.81	282	35800	127.47							318	35800	57.15	316	35800	37.29
																			214	25300	201.64	282	35800	142.38							318	35800	60.44	320	35800	152.28
																			214	25300	210.04	282	35800	165.42							318	35800	67.93	320	35800	181.81
																			214	25300	215.53	282	35800	191.46							318	35800	80.27	320	35800	236.94
																			214	25300	221.34	282	35800	233.01							318	35800	84.5	321	35800	168.13
																			214	25300	229.79	283	35800	2.9							318	35800	90.38	321	35800	178.33
																			214	25300	238.69	283	35800	22.97							318	35800	97.75	321	35800	184.05
																			215	25300	19.63	283	35800	56.58							321	25300	22.68	321	35800	200.91
																			215	25300	216.12	285	35800	34.8							322	25300	13.5	322	25300	16.91
																			215	25300	231.79	285	35800	43.98							323	25300	221.31	322	25300	26.51
																			215	25300	247.12	285	35800	48.92							323	25300	225.62	322	25300	41.73
																			216	25300	27.84	285	35800	52.19							323	25300	234.12	322	25300	108.88
																			217	25300	68.74	285	35800	56.42							323	25300	239.54	323	35800	192.23
																			217	25300	97.84	285	35800	65.53							323	25300	249.59	323	35800	205.46
																			217	25300	159.67	285	35800	72.01							324	25300	7.81	323	35800	213.08
																			217	25300	173.65	285	35800	85.83							324	25300	29.58	323	35800	216.79
																			219	25300	46.15	285	35800	102.86							324	25300	39.08	323	35800	220.5
																			219	25300	57.13	285	35800	116.92							324	25300	44.6	323	35800	226.49
																			219	25300	61.99	285	35800	128.87							324	25300	63.09	323	35800	242.04
																			219	25300	79.22	285	35800	145.31							324	25300	69.47	324	35800	4.2
																			219	25300	111.03	286	35800	87.78							324	25300	73.47	324	35800	9.14
																			219	25300	129.98	286	35800	208.59							327	25300	95.68	324	35800	13.38
																			219	25300	142.98	287	35800	141.62							327	25300	101.05	324	35800	21.59
																			219	25300	147.67	287	35800	219.17							327	25300	108.63	324	35800	28.96
																			219	25300	150.63	288	35800	59.08							327	25300	122.18	324	35800	40.8
																			219	25300	156.6	288	35800	75.57							327	25300	139.59	324	35800	66.2
																			219	25300	169.44	288	35800	242.4							327	25300	151.97	326	25300	13.09
																			219	25300	172.6	288	35800	248.5							329	25300	64.22	326	25300	19.87
																			219	25300	176.71	289	25300	3.57							329	25300	66.85	326	25300	25.36
																			219	25300	180.1	289	25300	10.64							329	25300	70.46	326	25300	31.27
																			219	25300	195.06	289	25300	14.18							329	25300	74.17	326	25300	39.37
																			219	25300	211.21	289	25300	21.78							329	25300	80.72	326	25300	43.67
																			220	25300	166.09	289	25300	36.5							329	25300	88.62	326	25300	48.73
																			220	25300	222.56	289	25300	59.96							329	25300	91.71	326	25300	58.55
																			221	25300	164.49	289	25300	63.15							329	25300	107.57	326	25300	63
																			221	25300	172.65	289	25300	78.88							329	25300	111.38	326	25300	67.74
																			221	25300	176.43	291	35800	205.75							329	25300	117.71	326	25300	75.48
																			221	25300	184.48	292	35800	2.65							329	25300	187.86	326	25300	78.11
																			221	25300	188.91	292	35800	17.23							330	25300	194.75	326	25300	88.85
																			221	25300	213.15	292	35800	55.76							334	35800	12.99	326	25300	95.91
																			221	25300	246.28	292	35800	127.68							334	35800	17.55	326	25300	99.8
																			223	35800	17.79	292	35800	150.19							334	35800	20.18	326	25300	102.43
																			223	35800	26.66	292	35800	154.91							334	35800	26.78	326	25300	116.27
																			223	35800	38.44	292	35800	159.99							334	35800	32.68	326	25300	120.53
																			223	35800	45.58	292	35800	168.62							334	35800	37.1	326	25300	128.94
																			223	35800	57.87	292	35800	172.27							334	35800	41.49	326	25300	137.42
																			223	35800	70.91	292	35800	198.04							334	35800	45.01	326	25300	141.78
																			223	35800	159.95	292	35800	208.66							334	35800	54.99	326	25300	146.1
																			224	25300	13.84	292	35800	239.71							334	35800	62.23	326	25300	149.29
																			224	25300	23.5	294	35800	223.75							334	35800	64.97	326	25300	153.2
																			224	25300	100.67	294	35800	247.61							334	35800	70.71	326	25300	183.59
																			224	25300	119.75	295	35800	25.16							334	35800	75.75	327	35800	126
																			224	25300	168.16	295	35800	232.83							334	35800	86.35	327	35800	132.89
																			225	25300	242.25	295	35800	243.05							334	35800	96.06	327	35800	136.53
																			225	25300	244.92	296	35800	21.02							334	35800	138.51	327	35800	140.99
																			226	25300	0.35	296	35800	224							334	35800	146.66	327	35800	146.95
																			226	25300	10.04	296	35800	226.81							334	35800	164.75	327	35800	217.19
																			226	25300	20.3	296	35800	237.98							334	35800	168.75	327	35800	221.34
																			226	25300	27.34	296	35800	240.68							334	35800	171.55	327	35800	225.79
																			226	25300	44.67	296	35800	243.7							334	35800	194.33	327	35800	230.85
																			226	25300	51.63	297	35800	1.56							335	25300	85.21	327	35800	240.96
																			226	25300	174.39	297	35800	5.03							335	25300	95.4	327	35800	244.56
																			227	35800	23.32	297	35800	10.18							335	25300	99.33	328	35800	3.42
																			227	35800	30.11	297	35800	22.24							335	25300	104.79	328	35800	16.34
																			227	35800	53.08	297	35800	31.22							335	25300	113.71	328	35800	37.48
																			227	35800	69.99	297	35800	37.89							335	25300	119.96	329	35800	84.61
																			227	35800	93.68	298	25300	11.7							335	25300	126.91	329	35800	89.69
																			228	25300	38.01	298	25300	22.88							335	25300	130.67	329	35800	93.37
																			228	25300	45.28	298	25300	28.99							335	25300	139.49	329	35800	98.9
																			228	25300	64.1	298	25300	34.78							335	25300	142.88	329	35800	115.52
																			228	25300	113.46	301	35800	169.73							335	25300	145.6	329	35800	119.28
																			230	25300	97.46	301	35800	193.49							337	25300	207.79	329	35800	124.79
																			230	25300	118.8	301	35800	205.12							338	35800	13.86	329	35800	130.46
																			230	25300	149.21	301	35800	228.62							338	35800	18.15	329	35800	136.15
																			231	25300	211.55	301	35800	242.12							338	35800	21.44	329	35800	165.52
																			231	25300	248.13	303	35800	235.42							338	35800	42.07	329	35800	174.72
																			232	25300	8.22	304	35800	27.68							338	35800	46.22	329	35800	185.16
																			232	25300	62.74	304	35800	45.28							338	35800	58.09	334	35800	164.06
																			232	25300	131.52	304	35800	67.77							338	35800	71.49	334	35800	223.61
																			232	25300	180.29	304	35800	108.7							338	35800	105.93	334	35800	226.58
																			232	25300	247.63	305	35800	45.17							338	35800	129.38	334	35800	232.51
																			233	25300	11.45	305	35800	64.03							342	25300	217.32	334	35800	235.14
																			233	25300	15.36	305	35800	80.64							342	25300	220.83	334	35800	239.46
																			233	25300	18.08	305	35800	236.83							342	25300	226.26	334	35800	244.77
																			233	25300	27.17	306	35800	70.94							342	25300	247.68	334	35800	248.59
																			233	25300	33.63	306	35800	87.7							343	25300	21.39	335	35800	1.84
																			233	25300	44.62	306	35800	116.77							343	25300	38.99	335	35800	7.84
																			233	25300	77	306	35800	122.3							347	25300	57.72	335	35800	11.03
																			233	25300	92.04	306	35800	131.74							347	25300	161.81	335	35800	14.27
																			233	25300	112.6	306	35800	152.28							348	25300	222.9	335	35800	21.3
																			234	25300	42.88	306	35800	161.29							348	25300	237.26	335	35800	25.69
																			234	25300	50.02	306	35800	168.36							348	25300	244.43	335	35800	38.08
																			234	25300	53.97	306	35800	191.3							348	25300	249.94	335	35800	50.21
																			234	25300	60.91	306	35800	201.23							349	25300	13.28	338	35800	18.55
																			234	25300	68.13	306	35800	203.98							349	25300	22.61	338	35800	22.14
																			234	25300	82.73	306	35800	228.84							349	25300	28.76	338	35800	25.15
																			234	25300	94.81	308	35800	46.66							349	25300	36.71	338	35800	27.78
																			234	25300	110.31	308	35800	56.26							349	25300	43.34	338	35800	30.99
																			234	25300	114.71	308	35800	74.44							349	25300	114.34	338	35800	36.71
																			234	25300	118.03	308	35800	88.53							349	25300	126.45	338	35800	49.68
																			234	25300	134.06	308	35800	221.96							349	25300	131.07	338	35800	53.18
																			234	25300	141.29	309	35800	14.58							351	35800	13.2	338	35800	56.45
																			234	25300	145.75	309	35800	20.98							351	35800	16.01	338	35800	60.52
																			234	25300	180.85	309	35800	71.44							351	35800	38.89	338	35800	76.67
																			234	25300	184.88	309	35800	199.26							351	35800	46.19	338	35800	81.55
																			237	25300	17.83	309	35800	225.54							351	35800	51.17	338	35800	139.16
																			237	25300	56.98	310	35800	225.65							351	35800	56.16	338	35800	164.87
																			237	25300	83.43	311	35800	1.15							351	35800	98.57	340	35800	203.72
																			237	25300	188.37	311	35800	27.95							351	35800	107.02	340	35800	213.27
																			238	35800	17.13	311	35800	55.38							351	35800	109.79	340	35800	218.26
																			238	35800	20.96	311	35800	95.33							351	35800	113.77	340	35800	226.21
																			238	35800	24.99	311	35800	111.38							353	25300	72.96	340	35800	236.19
																			238	35800	36.22	311	35800	187.77							353	25300	86.06	340	35800	240.6
																			238	35800	45.54	312	35800	46.46							353	25300	105.44	340	35800	244.62
																			238	35800	48.71	312	35800	217.18							353	25300	113.26	340	35800	248.24
																			238	35800	61.58	312	35800	220.91							353	25300	118.77	341	35800	5.12
																			238	35800	93.76	312	35800	228.43							353	25300	122.06	342	35800	141.05
																			238	35800	155.74	312	35800	236.51							353	25300	126.53	344	35800	40.58
																			239	25300	120.98	312	35800	240.82							353	25300	149.48	344	35800	46.98
																			240	25300	120.26	313	35800	0.07							356	25300	65.86	344	35800	49.61
																			240	25300	125.88	313	35800	27.48							356	25300	116.56	344	35800	53.9
																			240	25300	141.74	313	35800	48.39							356	25300	121.32	344	35800	60.76
																			240	25300	175.68	313	35800	87.37							356	25300	131.44	344	35800	71.7
																			240	25300	198.9	314	35800	247.32							356	25300	134.49	344	35800	89.51
																			241	25300	14.58	315	35800	6.47							357	25300	5.2	344	35800	101.51
																			241	25300	40.61	315	35800	14.79							357	25300	89.18	344	35800	104.45
																			241	25300	101.56	315	35800	21.86							357	25300	93.3	344	35800	110.44
																			241	25300	106.56	315	35800	36.81							357	25300	109.07	344	35800	122.5
																			242	25300	2.88	315	35800	206.5							357	25300	116.35	344	35800	154.06
																			242	25300	220.69	316	35800	3.68							357	25300	119.12	344	35800	196.29
																			243	35800	7.45	316	35800	11.57							357	25300	123.41	347	35800	170.16
																			243	35800	24.15	316	35800	225.33							357	25300	132.26	347	35800	173.98
																			243	35800	29.35	316	35800	240.99							357	25300	135.14	347	35800	183.55
																			243	35800	35.36	317	25300	8.13							357	25300	140.02	347	35800	187.16
																			243	35800	38.5	317	25300	11.63							357	25300	147.05	347	35800	215.07
																			243	35800	62.69	317	25300	15.12							357	25300	165.19	347	35800	228.77
																			243	35800	82.4	317	25300	43.86							357	25300	170.39	348	35800	12.82
																			243	35800	108.68	318	35800	26.92							357	25300	176.95	348	35800	22.21
																			243	35800	129.82	318	35800	40.02							357	25300	179.69	350	35800	59.66
																			244	25300	78.55	318	35800	47.72							357	25300	215.04	350	35800	208.31
																			244	25300	159.91	318	35800	59.17							358	25300	225.6	350	35800	210.95
																			244	25300	171.29	318	35800	63.23							358	25300	237.89	350	35800	215.8
																			244	25300	179.39	318	35800	66.07							358	25300	242.53	350	35800	218.94
																			244	25300	185.06	318	35800	71.34							359	25300	1.31	350	35800	223.19
																			244	25300	189.43	318	35800	104.15							359	25300	5.32	350	35800	226.68
																			244	25300	207.87	318	35800	109.97							359	25300	8.01	350	35800	231.62
																			244	25300	229.67	318	35800	116.25							359	25300	14.98	350	35800	235.52
																			245	25300	11.01	318	35800	125.03							359	25300	23.2	350	35800	240.69
																			246	25300	9.13	318	35800	138.22							359	25300	60.39	351	35800	2.98
																			246	25300	19.75	318	35800	147.13							359	25300	65.79	351	35800	15.8
																			246	25300	146.28	318	35800	175.89							359	25300	76.4	353	35800	176.57
																			246	25300	159.91	320	35800	42.49							359	25300	81.8	353	35800	179.92
																			246	25300	177.7	320	35800	62.59							359	25300	93.56	353	35800	185.08
																			247	25300	36.65	320	35800	70.99							363	35800	13.15	353	35800	203.28
																			247	25300	70.6	320	35800	97.92							363	35800	16.09	353	35800	212.93
																			247	25300	93.22	321	35800	99.5							363	35800	20.79	353	35800	241.65
																			247	25300	142.33	322	35800	44.35							363	35800	28.18	354	35800	11.64
																			247	25300	197.82	323	35800	3.82							363	35800	37.3	354	35800	37.27
																			247	25300	202.11	323	35800	144.24							363	35800	52.54	356	35800	153.95
																			247	25300	214.81	323	35800	229.43							363	35800	68.56	356	35800	158.45
																			247	25300	222.27	324	25300	11.98							363	35800	108.3	356	35800	165.4
																			247	25300	231.04	324	25300	20.69							363	35800	116.55	359	25300	12.81
																			248	25300	182.36	324	25300	23.87							363	35800	120.15	359	25300	17.91
																			248	25300	198.95	324	25300	57.52							363	35800	122.79	359	25300	20.98
																			249	25300	24.6	324	25300	80.12							363	35800	133.36	359	25300	30.13
																			249	25300	90.56	324	25300	95.52							363	35800	160.52	359	25300	45.94
																			249	25300	117.88	324	25300	131.51							363	35800	170.92	359	25300	54.98
																			249	25300	127.71	326	35800	34.35							367	25300	46.45	359	25300	71.89
																			249	25300	141.65	326	35800	50.4							367	25300	51.12	359	25300	81.65
																			249	25300	146.4	326	35800	64.28							367	25300	55.81	359	25300	134.81
																			249	25300	191.61	326	35800	81.76							367	25300	58.49	359	25300	159.9
																			250	25300	146.56	326	35800	100.69							367	25300	65.56	359	25300	168.39
																			250	25300	151.35	327	35800	5.89							367	25300	68.34	359	25300	175.61
																			250	25300	153.98	327	35800	27.86							367	25300	79.17	359	25300	232.31
																			250	25300	157.71	327	35800	66.97							367	25300	96.73	360	35800	5.8
																			250	25300	167.33	327	35800	169.86							367	25300	114.13	360	35800	23.87
																			250	25300	173.73	327	35800	190.63							368	35800	33.36	360	35800	56.33
																			250	25300	187.65	327	35800	205.27							368	35800	40.69	360	35800	75.26
																			250	25300	195.31	327	35800	209.72							368	35800	50.43	360	35800	80.78
																			250	25300	205.22	327	35800	239.79							368	35800	55.48	360	35800	104.75
																			250	25300	218.3	327	35800	247.18							368	35800	95.46	360	35800	110.14
																			251	25300	72.18	328	25300	14.11							368	35800	102.08	364	25300	36.34
																			251	25300	77.19	328	25300	17.3							370	25300	181.75	364	25300	42.15
																			251	25300	81.65	328	25300	20.97							371	25300	37.22	364	25300	57.88
																			251	25300	84.28	328	25300	66.03							371	25300	40.46	364	25300	67.05
																			251	25300	87.57	328	25300	74.35							371	25300	43.41	364	25300	73.2
																			251	25300	94.77	328	25300	83.72							371	25300	52.64	364	25300	75.83
																			251	25300	101.04	329	35800	31.44							371	25300	58.37	364	25300	92.4
																			251	25300	105.29	329	35800	47.41							371	25300	61.53	364	25300	95.51
																			251	25300	118.43	329	35800	68.51							371	25300	66.48	364	25300	104.58
																			251	25300	127.02	329	35800	100.28							371	25300	73.21	364	25300	107.22
																			251	25300	147.63	329	35800	188.66							371	25300	76.82	366	35800	102.39
																			251	25300	159.18	329	35800	204.24							371	25300	94.02	367	35800	30.5
																			251	25300	163.51	329	35800	210.38							371	25300	106.6	367	35800	34.15
																			251	25300	166.54	329	35800	215.32							371	25300	142.87	367	35800	38.79
																			251	25300	170.37	329	35800	234.68							374	25300	12.87	367	35800	42.17
																			251	25300	232.36	330	35800	75.37							377	25300	107.18	367	35800	45.96
																			251	25300	234.99	331	35800	37.46							377	25300	112.65	367	35800	48.7
																			251	25300	237.94	331	35800	81.76							377	25300	121.84	367	35800	61.79
																			251	25300	240.57	331	35800	120.01							377	25300	132.09	368	35800	220.18
																			251	25300	243.2	331	35800	123.88							377	25300	143.29	368	35800	223.77
																			252	35800	24.28	331	35800	127.01							377	25300	167.11	368	35800	230.56
																			252	35800	44.63	331	35800	130.76							379	25300	146.1	368	35800	248.4
																			252	35800	54.06	331	35800	142.09							380	25300	118.06	369	35800	5.32
																			252	35800	58.24	331	35800	174.51							380	25300	124.05	369	35800	13.64
																			252	35800	61.47	331	35800	194.16							380	25300	127.86	369	35800	31.34
																			252	35800	65.84	331	35800	217.95							380	25300	137.14	369	35800	75.6
																			252	35800	68.47	333	35800	27.58							380	25300	142.35	369	35800	104.07
																			252	35800	71.98	333	35800	44.11							380	25300	145.58	369	35800	108.8
																			252	35800	129.28	333	35800	62.44							380	25300	158.26	369	35800	119.73
																			252	35800	132.04	333	35800	90.93							380	25300	180.78	369	35800	124.77
																			252	35800	136.67	333	35800	129.98							380	25300	186.27	369	35800	154.25
																			252	35800	175.92	334	35800	201.87							380	25300	193.38	369	35800	159.48
																			252	35800	185.5	334	35800	213.19							380	25300	226.83	369	35800	171.89
																			252	35800	196.5	334	35800	234.29							380	25300	237.79	369	35800	181.87
																			252	35800	206.34	335	35800	98.16							381	25300	5.27	369	35800	194.57
																			252	35800	212.46	336	35800	187.05							381	25300	12.77	369	35800	201.57
																			254	25300	38.23	337	35800	40.97							383	25300	201.4	369	35800	206
																			254	25300	46	337	35800	178.86							384	35800	12.95	369	35800	219.67
																			254	25300	61.73	337	35800	182.99							384	35800	15.59	374	35800	210.3
																			254	25300	75.11	337	35800	189.2							384	35800	18.55	374	35800	232.55
																			254	25300	89.11	337	35800	196.51							384	35800	23.17	374	35800	237.06
																			255	25300	74.86	337	35800	203.87							384	35800	28.23	374	35800	240.66
																			256	25300	137.57	337	35800	208.36							384	35800	32.8	375	35800	1.95
																			256	25300	146.7	337	35800	217.92							384	35800	40.32	375	35800	20.06
																			256	25300	151	337	35800	226.34							384	35800	45.23	375	35800	40.45
																			256	25300	156.62	337	35800	241.74							384	35800	52.67	378	35800	243.53
																			257	35800	44.44	338	35800	17.38							384	35800	82.48	381	35800	35.24
																			257	35800	56.39	338	35800	26.35							384	35800	95.95	381	35800	40.96
																			257	35800	85.03	338	35800	30.43							384	35800	101.48	381	35800	47.24
																			257	35800	109.79	338	35800	194.59							385	25300	54.72	381	35800	57.22
																			257	35800	227.38	338	35800	202.64							385	25300	57.66	381	35800	89.1
																			257	35800	246.86	338	35800	217.06							385	25300	62.82	381	35800	103.74
																			258	25300	5.26	338	35800	232.9							385	25300	65.89	382	35800	248.99
																			259	25300	4.42	339	35800	8.27							385	25300	71.32	383	25300	9.36
																			259	25300	26.91	339	35800	28.48							385	25300	75.79	383	25300	12.26
																			259	25300	32.08	339	35800	155.94							385	25300	80.56	383	25300	19.81
																			259	25300	197.58	341	35800	31.33							385	25300	86.76	383	25300	39.73
																			259	25300	217.47	341	35800	57.83							385	25300	93.49	383	25300	44.35
																			259	25300	229.9	342	35800	234.96							385	25300	98.6	383	25300	47.55
																			260	25300	19.62	343	35800	30.77							385	25300	216.23	383	25300	54.48
																			260	25300	57.93	343	35800	38.83							385	25300	219.64	383	25300	61.73
																			260	25300	109.35	344	35800	65.43							385	25300	225.31	383	25300	80.14
																			261	25300	84.62	344	35800	73.66							385	25300	227.94	383	25300	83.6
																			262	25300	117.18	344	35800	78.03							385	25300	232.92	383	25300	120.48
																			262	25300	165.59	344	35800	81.78							386	25300	2.9	383	25300	138.92
																			262	25300	172.65	344	35800	88.89							387	25300	29.78	384	35800	94.38
																			262	25300	177.48	344	35800	91.6							387	25300	36.93	384	35800	101.42
																			262	25300	181.74	344	35800	137.4							387	25300	40.45	384	35800	111.46
																			262	25300	186.73	344	35800	148.23							387	25300	43.33	384	35800	114.79
																			262	25300	195.55	344	35800	153.32							387	25300	58.79	384	35800	121.05
																			262	25300	205.51	344	35800	157.11							387	25300	68.48	384	35800	129.77
																			262	25300	210.47	344	35800	161.05							387	25300	73.05	384	35800	139.34
																			262	25300	217.96	344	35800	168.54							387	25300	77.51	384	35800	151.48
																			262	25300	220.72	345	35800	182.09							387	25300	83.13	384	35800	161.94
																			262	25300	224.46	345	35800	198.98							387	25300	93.3	384	35800	168.19
																			262	25300	234	346	35800	30.49							387	25300	98.64	384	35800	179.88
																			262	25300	239.68	346	35800	36.75							387	25300	103.75	384	35800	183
																			263	25300	4.69	346	35800	58.16							387	25300	107.71	384	35800	186.97
																			264	25300	31.21	346	35800	129.06							387	25300	111.23	384	35800	189.6
																			264	25300	48.73	346	35800	193.68							387	25300	117.02	384	35800	197.64
																			264	25300	79.2	348	35800	1.98							387	25300	129.11	388	25300	13.11
																			264	25300	152.8	348	35800	13.53							387	25300	134.9	388	25300	17.67
																			264	25300	238.69	348	35800	27.3							393	25300	40.44	388	25300	23.66
																			265	25300	25.8	348	35800	45.99							393	25300	44.15	388	25300	50.96
																			265	25300	82.8	349	35800	12.49							393	25300	52.3	388	25300	58.19
																			265	25300	122.12	349	35800	140.53							393	25300	56.08	388	25300	65.14
																			266	25300	7.2	349	35800	186.71							393	25300	67.57	388	25300	80.37
																			266	25300	15.02	350	35800	34.26							393	25300	74.05	388	25300	145.17
																			266	25300	69.64	351	35800	99.77							393	25300	76.76	388	25300	195.16
																			267	25300	79.43	351	35800	150.28							393	25300	80.78	388	25300	199.1
																			267	25300	110.03	351	35800	165.85							393	25300	83.61	388	25300	205.49
																			267	25300	129.05	351	35800	171.06							396	25300	163.91	388	25300	208.16
																			267	25300	225.23	351	35800	184.29							397	25300	23.69	388	25300	210.92
																			268	25300	25.86	351	35800	189.98							397	25300	33.77	388	25300	213.73
																			268	25300	45.22	351	35800	207.49							397	25300	45.05	388	25300	216.44
																			268	25300	58.22	351	35800	214.89							397	25300	58.03	388	25300	219.88
																			268	25300	71.7	353	35800	48.25							397	25300	68.03	388	25300	229.87
																			268	25300	114.09	353	35800	98.11							397	25300	70.66	388	25300	240.37
																			268	25300	121.15	353	35800	107.86							397	25300	79.81	389	35800	1.85
																			268	25300	125.12	353	35800	116.49							397	25300	83.38	389	35800	4.95
																			268	25300	135.6	353	35800	131.41							397	25300	86.81	389	35800	13.43
																			268	25300	139.88	354	35800	242.57							397	25300	100.74	389	35800	36.54
																			268	25300	153.28	355	35800	26.39							397	25300	107.03	389	35800	41.57
																			268	25300	157.25	355	35800	134.22							399	35800	13.02	389	35800	54.27
																			268	25300	180.65	355	35800	145.28							399	35800	18.21	389	35800	122.53
																			268	25300	223.34	355	35800	156.09							399	35800	22.81	389	35800	128.4
																			268	25300	236.15	355	35800	168.36							399	35800	29.05	389	35800	135.96
																			269	25300	6.27	356	35800	247.89							399	35800	34.37	389	35800	142.78
																			269	25300	137.69	358	35800	8.86							399	35800	38.44	389	35800	148.21
																			269	25300	166.18	358	35800	52.66							399	35800	47.85	391	35800	168.74
																			269	25300	175.47	358	35800	66.59							399	35800	83.49	391	35800	213.39
																			269	25300	190.93	358	35800	130.99							399	35800	89.28	394	25300	12.15
																			269	25300	194.65	359	35800	105.12										394	25300	23.67
																			269	25300	206.14	359	35800	113.34										394	25300	55.57
																			270	25300	1.45	359	35800	115.97										394	25300	61.96
																			271	25300	65.39	359	35800	125.23										394	25300	68.22
																			271	25300	102.23	359	35800	128.28										394	25300	81.38
																			271	25300	106.3	359	35800	137.34										396	35800	57.39
																			271	25300	109.44	359	35800	140.87										396	35800	66.81
																			271	25300	112.26	359	35800	151.25										396	35800	96.59
																			271	25300	116.88	359	35800	165.96										399	25300	12.05
																			271	25300	119.81	359	35800	191.62										399	25300	29.49
																			271	25300	124.33	359	35800	194.4										399	25300	35.83
																			271	25300	135.9	359	35800	200.18										399	25300	41.64
																			271	25300	151.54	360	25300	15.24										399	25300	52.31
																			271	25300	175.36	360	25300	24.49										399	25300	64.22
																			271	25300	194.13	360	25300	32.63										399	25300	67.81
																			271	25300	205.24	360	25300	42.82										399	25300	72.33
																			273	25300	4.35	360	25300	72.3										399	25300	76.06
																			273	25300	73.72	360	25300	92.96										399	25300	99.07
																			273	25300	101.6	360	25300	118.38										399	25300	107.76
																			273	25300	107.23	362	35800	122.72										399	25300	119.62
																			273	25300	130.23	362	35800	143.56										399	25300	148.37
																			273	25300	140.24	362	35800	201.47										399	25300	159.52
																			273	25300	165.79	363	35800	51.44										399	25300	165.47
																			273	25300	215.76	363	35800	226.44										399	25300	168.79
																			275	25300	153.02	364	35800	10.01										399	25300	179.72
																			275	25300	183.05	364	35800	37.29										399	25300	184.67
																			275	25300	189.76	364	35800	78.86										399	25300	191.99
																			275	25300	208.12	364	35800	103.01										399	25300	206.96
																			275	25300	215.78	364	35800	137.01										399	25300	216.84
																			275	25300	219.85	364	35800	151.28										399	25300	234.69
																			275	25300	229.11	364	35800	153.91										399	25300	244.3
																			275	25300	232.67	364	35800	212.28										400	35800	84.25
																			275	25300	238.97	364	35800	230
																			276	25300	0.15	364	35800	249.6
																			276	25300	105.75	366	35800	122.09
																			277	25300	35.71	366	35800	128.45
																			277	25300	51.89	366	35800	145.66
																			277	25300	72.32	366	35800	150.64
																			278	25300	27.06	366	35800	162.65
																			278	25300	49.07	366	35800	167.45
																			278	25300	124.34	366	35800	170.93
																			278	25300	166.22	366	35800	183.79
																			278	25300	219.86	366	35800	190.73
																			279	25300	91.88	366	35800	194.3
																			279	25300	119.48	366	35800	202.69
																			279	25300	133.97	366	35800	205.66
																			279	25300	145.76	366	35800	214.76
																			280	25300	199.42	366	35800	246.41
																			281	25300	85.68	367	35800	221.08
																			281	25300	92.3	367	35800	227.63
																			281	25300	105.13	367	35800	241.39
																			281	25300	117.19	368	35800	39.09
																			281	25300	141.88	369	25300	32.51
																			281	25300	203.98	369	25300	58.55
																			282	25300	179.07	369	25300	68.22
																			282	25300	191.3	369	25300	75.09
																			283	25300	0.68	369	25300	96.47
																			283	25300	34.05	369	25300	110.76
																			283	25300	66.25	370	35800	239.56
																			283	25300	113.25	371	35800	9.23
																			283	25300	140.06	371	35800	29.48
																			283	25300	239.95	371	35800	41.12
																			284	25300	249.07	371	35800	115.86
																			285	25300	17.35	372	35800	62.35
																			285	25300	34.61	372	35800	82.3
																			286	25300	32.55	372	35800	221.07
																			286	25300	78.26	372	35800	242.76
																			286	25300	94.48	373	35800	2.98
																			286	25300	97.62	373	35800	21.5
																			286	25300	100.56	374	35800	38.61
																			286	25300	103.19	374	35800	61.05
																			286	25300	106.87	374	35800	148.05
																			286	25300	110.53	374	35800	169.17
																			286	25300	113.58	374	35800	176.9
																			286	25300	118.09	374	35800	193.95
																			286	25300	134.82	374	35800	206.35
																			286	25300	239.97	374	35800	223.69
																			287	25300	100.78	375	35800	101.19
																			287	25300	121.45	375	35800	117.45
																			287	25300	185.57	375	35800	209.68
																			287	25300	196.77	377	35800	29.55
																			287	25300	209.8	377	35800	53.85
																			287	25300	214.99	377	35800	105.47
																			287	25300	229.62	377	35800	114.68
																			287	25300	232.27	377	35800	248.68
																			287	25300	236.16	378	35800	5
																			287	25300	242.63	378	35800	13.97
																			288	25300	2.21	378	35800	22.05
																			288	25300	19.64	378	35800	31.89
																			288	25300	23.01	378	35800	38.06
																			288	25300	103.12	378	35800	51.71
																			288	25300	114.54	378	35800	64.73
																			288	25300	127.55	378	35800	80.57
																			289	25300	29.37	378	35800	96.23
																			289	25300	54.53	378	35800	110.99
																			289	25300	108.32	379	35800	113.89
																			289	25300	200.41	379	35800	122.13
																			290	35800	12.38	379	35800	129.17
																			290	35800	17.17	379	35800	153.79
																			290	35800	37.09	379	35800	170.2
																			290	35800	40.87	379	35800	202.9
																			290	35800	51.99	379	35800	205.62
																			290	35800	70.66	379	35800	208.79
																			290	35800	98.67	379	35800	211.57
																			291	25300	19.35	379	35800	217.86
																			291	25300	27.84	379	35800	238.21
																			291	25300	39.04	380	35800	36.52
																			291	25300	191.85	380	35800	61.23
																			292	25300	86.87	380	35800	88.69
																			292	25300	151.81	380	35800	93.41
																			292	25300	197.37	380	35800	106.12
																			293	25300	70.56	380	35800	134.79
																			293	25300	195.2	380	35800	150.27
																			294	25300	16.55	380	35800	153.37
																			294	25300	19.29	380	35800	157.12
																			294	25300	23.74	380	35800	172.77
																			294	25300	40.39	380	35800	221.58
																			294	25300	54.47	380	35800	224.29
																			294	25300	65.23	380	35800	229.57
																			294	25300	116.43	381	35800	27.18
																			294	25300	137.82	381	35800	32.15
																			294	25300	174.03	381	35800	34.83
																			296	25300	18.49	381	35800	38.86
																			296	25300	133.85	381	35800	103.26
																			296	25300	146.36	382	35800	129.38
																			296	25300	160.16	382	35800	148.81
																			296	25300	210.5	382	35800	195.49
																			296	25300	239.17	384	35800	49.08
																			297	25300	21.72	384	35800	68.37
																			297	25300	163.17	384	35800	83.8
																			297	25300	179.38	385	35800	80.19
																			297	25300	194.18	385	35800	85.87
																			298	25300	127.73	385	35800	102.44
																			298	25300	130.72	385	35800	108.64
																			298	25300	135.42	385	35800	111.34
																			298	25300	138.12	385	35800	117.04
																			298	25300	147.04	385	35800	127.81
																			298	25300	163.58	385	35800	147.4
																			298	25300	198.74	385	35800	150.32
																			299	25300	175.64	385	35800	159.59
																			300	25300	57.9	387	35800	78.65
																			300	25300	72.67	387	35800	96.13
																			300	25300	171.24	387	35800	110.36
																			300	25300	210.85	387	35800	131.21
																			300	25300	219.35	387	35800	212.39
																			300	25300	245.35	388	35800	71.37
																			301	25300	5.69	388	35800	189.66
																			301	25300	27.06	388	35800	203.05
																			301	25300	162.37	388	35800	208.27
																			302	25300	169.69	388	35800	216.8
																			302	25300	213.95	388	35800	219.78
																			303	25300	86.58	388	35800	237.45
																			303	25300	102.04	388	35800	246.28
																			303	25300	114.76	390	25300	11.27
																			303	25300	146.93	390	25300	15.35
																			303	25300	164.08	390	25300	19.24
																			304	25300	176.04	390	25300	100.55
																			304	25300	186.17	390	25300	113.87
																			304	25300	225.26	392	35800	4.89
																			305	25300	21.05	392	35800	8.27
																			306	25300	5.38	392	35800	14.22
																			306	25300	38.91	392	35800	19.26
																			306	25300	151.25	392	35800	28.02
																			306	25300	157.79	392	35800	39.18
																			306	25300	165.9	392	35800	59.6
																			306	25300	189.86	392	35800	79.39
																			306	25300	200.15	393	35800	54.44
																			306	25300	208.13	393	35800	60.09
																			306	25300	246.27	393	35800	65.42
																			307	25300	169.19	393	35800	68.72
																			307	25300	186.89	393	35800	76.04
																			307	25300	201.53	393	35800	82.67
																			307	25300	209.89	393	35800	85.86
																			307	25300	217.32	393	35800	92.8
																			307	25300	242.22	393	35800	116.82
																			308	25300	192.59	393	35800	122.66
																			309	25300	0.2	393	35800	128.83
																			309	25300	76.77	393	35800	135.33
																			309	25300	83.64	393	35800	142.04
																			309	25300	113.21	393	35800	197.44
																			309	25300	185.53	393	35800	200.47
																			309	25300	207.41	393	35800	218.71
																			310	25300	24.81	393	35800	221.72
																			310	25300	102.75	394	35800	16.72
																			310	25300	184.95	394	35800	23.25
																			311	25300	154.54	394	35800	26.07
																			311	25300	167.34	394	35800	29.67
																			311	25300	196.01	395	25300	15.69
																			311	25300	225.04	395	25300	176.19
																			311	25300	238.6	395	25300	182.83
																			312	35800	23.13	395	25300	229.75
																			312	35800	41.44	395	25300	241.66
																			312	35800	56.78	396	35800	7.44
																			312	35800	66.39	397	35800	206.26
																			312	35800	117.92	397	35800	239.16
																			312	35800	136.23	398	35800	3.76
																			313	25300	4.63	398	35800	43.11
																			313	25300	13.23	399	35800	70.17
																			313	25300	26.75	399	35800	145.87
																			313	25300	38.09	399	35800	162.25
																			314	25300	103.97	399	35800	165.96
																			314	25300	122.24	399	35800	170.79
																			314	25300	137.7	399	35800	178.8
																			314	25300	152.55	399	35800	185.01
																			314	25300	172.7	399	35800	193.4
																			315	25300	165.43	399	35800	216.26
																			315	25300	182.09	399	35800	239.55
																			315	25300	205.21	400	35800	16.16
																			315	25300	220.05	400	35800	46.94
																			316	25300	125.35
																			316	25300	148.06
																			316	25300	158.15
																			317	25300	115.32
																			317	25300	212.79
																			319	25300	22.38
																			319	25300	40.7
																			319	25300	47.05
																			320	25300	1.05
																			320	25300	131.3
																			320	25300	144.78
																			320	25300	148.11
																			320	25300	156.04
																			320	25300	169.79
																			320	25300	194.79
																			320	25300	200.4
																			320	25300	206.22
																			320	25300	226.82
																			321	25300	4.33
																			322	25300	158.49
																			322	25300	183.59
																			322	25300	209.4
																			322	25300	224.44
																			323	35800	17.94
																			323	35800	25.21
																			323	35800	30.19
																			323	35800	40.84
																			323	35800	78.02
																			323	35800	92.13
																			324	25300	9.97
																			324	25300	15.05
																			324	25300	21.49
																			324	25300	29.26
																			324	25300	70.51
																			325	25300	40.38
																			325	25300	73.45
																			326	25300	92.41
																			326	25300	195.89
																			326	25300	202.3
																			326	25300	206.17
																			326	25300	208.8
																			326	25300	212.42
																			326	25300	215.83
																			326	25300	229.57
																			326	25300	235.11
																			327	35800	5.31
																			327	35800	14.32
																			328	25300	62.7
																			328	25300	83.42
																			328	25300	117.68
																			328	25300	139.58
																			328	25300	182.89
																			329	25300	91.34
																			329	25300	102.53
																			329	25300	111.41
																			330	25300	218.61
																			330	25300	222.58
																			330	25300	225.91
																			330	25300	229.55
																			330	25300	239.99
																			330	25300	249.48
																			331	35800	2.13
																			331	35800	6.58
																			331	35800	11.4
																			331	35800	25.57
																			331	35800	35.32
																			331	35800	88.29
																			332	25300	24.35
																			332	25300	32.19
																			332	25300	41.48
																			332	25300	44.37
																			332	25300	47
																			332	25300	58.36
																			332	25300	77.58
																			332	25300	87.57
																			332	25300	110.08
																			332	25300	135.17
																			333	25300	58.81
																			333	25300	82.4
																			333	25300	220.32
																			334	25300	47.91
																			335	35800	7.22
																			335	35800	20.86
																			335	35800	38.41
																			335	35800	45.17
																			335	35800	65.98
																			335	35800	75.43
																			336	25300	31.67
																			336	25300	88.49
																			336	25300	127.69
																			337	25300	138.3
																			337	25300	174.78
																			337	25300	195.94
																			337	25300	201.91
																			337	25300	210.5
																			337	25300	228.08
																			338	25300	34.02
																			338	25300	201.74
																			339	25300	158.96
																			339	25300	162.37
																			339	25300	166.31
																			339	25300	169.43
																			339	25300	174.47
																			339	25300	183.28
																			339	25300	190.08
																			339	25300	197.34
																			339	25300	218.13
																			339	25300	223.54
																			339	25300	233.8
																			339	25300	249.75
																			341	35800	24.26
																			341	35800	27.23
																			341	35800	35.47
																			341	35800	41.01
																			341	35800	46.7
																			341	35800	71.84
																			341	35800	84.19
																			342	25300	30.23
																			342	25300	39.85
																			342	25300	73.44
																			343	25300	110.08
																			343	25300	117.45
																			343	25300	127.85
																			343	25300	157.06
																			343	25300	179.31
																			343	25300	205.31
																			344	25300	44.94
																			344	25300	92.35
																			344	25300	114.59
																			344	25300	187.69
																			344	25300	211.12
																			344	25300	228.59
																			344	25300	239.02
																			345	25300	117.71
																			345	25300	120.35
																			345	25300	130.66
																			345	25300	134.12
																			345	25300	143.34
																			345	25300	151.33
																			345	25300	157.84
																			345	25300	164
																			345	25300	213
																			345	25300	225.67
																			345	25300	239.36
																			346	25300	42.11
																			347	25300	104.78
																			347	25300	115.04
																			347	25300	144.67
																			347	25300	152.38
																			347	25300	177.4
																			347	25300	239.42
																			348	35800	15.31
																			348	35800	19.9
																			348	35800	26.67
																			348	35800	31.15
																			348	35800	36.46
																			348	35800	67.76
																			349	25300	1.45
																			349	25300	21.02
																			349	25300	37.41
																			349	25300	56.26
																			349	25300	76.57
																			349	25300	151.68
																			349	25300	175.47
																			349	25300	242.58
																			350	25300	64.84
																			350	25300	81.28
																			350	25300	142.62
																			350	25300	162.58
																			351	25300	40.63
																			351	25300	50.31
																			351	25300	76.15
																			351	25300	129.77
																			351	25300	132.76
																			351	25300	138.5
																			351	25300	147.79
																			351	25300	150.59
																			351	25300	155.35
																			351	25300	160.66
																			351	25300	169.51
																			351	25300	172.21
																			351	25300	181.66
																			351	25300	198.76
																			351	25300	211.19
																			352	25300	61.15
																			352	25300	236.04
																			352	25300	242.94
																			352	25300	247.04
																			353	25300	24.38
																			353	25300	42.79
																			353	25300	105.14
																			353	25300	120.73
																			353	25300	129.77
																			353	25300	150.44
																			353	25300	185.99
																			353	25300	189.98
																			353	25300	192.79
																			353	25300	199.53
																			353	25300	221.49
																			353	25300	241.54
																			354	25300	109.73
																			354	25300	199.64
																			354	25300	208.13
																			355	25300	63.12
																			355	25300	80.74
																			355	25300	88.35
																			355	25300	94.61
																			355	25300	97.34
																			355	25300	100.8
																			355	25300	107.17
																			355	25300	110.89
																			355	25300	118.79
																			355	25300	124.63
																			355	25300	140.93
																			355	25300	143.61
																			355	25300	148.54
																			355	25300	158.42
																			355	25300	175.74
																			356	35800	32.78
																			356	35800	46.83
																			356	35800	54.83
																			356	35800	79.66
																			356	35800	196.54
																			357	25300	12.46
																			357	25300	19.42
																			357	25300	23
																			357	25300	53.2
																			357	25300	76.06
																			357	25300	103.82
																			357	25300	129.59
																			358	25300	89.34
																			358	25300	100.31
																			358	25300	208.1
																			359	25300	15.33
																			359	25300	83.95
																			359	25300	94.15
																			359	25300	122.12
																			359	25300	159.36
																			359	25300	198.02
																			360	25300	43.06
																			360	25300	226.84
																			360	25300	233.13
																			360	25300	246.04
																			361	35800	12.04
																			361	35800	17.19
																			361	35800	21.81
																			361	35800	27.99
																			361	35800	34.12
																			361	35800	42.24
																			361	35800	45.85
																			361	35800	66.98
																			362	25300	9.96
																			362	25300	25.16
																			362	25300	46.81
																			362	25300	76.8
																			362	25300	131.17
																			362	25300	206.5
																			362	25300	230.4
																			363	25300	165.33
																			363	25300	187.49
																			363	25300	218.66
																			363	25300	223.51
																			363	25300	228.84
																			363	25300	233.57
																			364	25300	3.35
																			364	25300	14.78
																			364	25300	42.51
																			364	25300	210.99
																			365	25300	115.2
																			365	25300	143.09
																			365	25300	148.4
																			365	25300	157.59
																			365	25300	183.3
																			365	25300	212.67
																			366	25300	5.48
																			366	25300	12.91
																			366	25300	49.47
																			366	25300	78.92
																			366	25300	167.46
																			366	25300	184.23
																			366	25300	239.41
																			367	25300	47.22
																			367	25300	54.13
																			367	25300	141.51
																			367	25300	148.5
																			367	25300	174.9
																			367	25300	188.36
																			367	25300	243.12
																			368	25300	33.28
																			368	25300	53.75
																			368	25300	113.48
																			368	25300	166.12
																			368	25300	191.64
																			368	25300	233.05
																			368	25300	236.99
																			368	25300	242.21
																			369	25300	163.78
																			369	25300	181.86
																			369	25300	191.89
																			370	25300	223.02
																			371	25300	0.24
																			371	25300	43.73
																			371	25300	75.18
																			371	25300	87.53
																			371	25300	126.56
																			371	25300	158.13
																			371	25300	231.73
																			371	25300	239.57
																			372	25300	163.23
																			373	25300	38.94
																			373	25300	178.58
																			373	25300	191.39
																			373	25300	198.15
																			373	25300	227.02
																			373	25300	237.65
																			373	25300	240.57
																			373	25300	245.66
																			374	25300	2.8
																			374	25300	5.58
																			374	25300	18.14
																			374	25300	22.06
																			374	25300	58.35
																			374	25300	139.96
																			375	25300	28.76
[truncated: 117 more rows]
