# Supplementary material for: Acetylcholine modulates the precision of prediction error in the auditory cortex
Source: eLife. 2024 Jan 19;12:RP91475. doi: 10.7554/eLife.91475 (PMC10942646; doi:10.7554/eLife.91475)
Supplement: Figure 3—source data 1. [file elife-91475-fig3-data1.xlsx]

## Sheet: Figure 3 FRAs
Figure 3A										Figure 3B
Control			Effect			Recovery				Control			Effect			Recovery
Frequency (kHz)	SPL (dB)	Spikes/trial	Frequency (kHz)	SPL (dB)	Spikes/trial	Frequency (kHz)	SPL (dB)	Spikes/trial		Frequency (kHz)	SPL (dB)	Spikes/trial	Frequency (kHz)	SPL (dB)	Spikes/trial	Frequency (kHz)	SPL (dB)	Spikes/trial
1	70	0	1	70	0.333333	1	70	0.333333		1	70	0	1	70	1	1	70	0
1	60	1.33333	1	60	1.66667	1	60	0		1	60	0	1	60	0.666667	1	60	0
1	50	0	1	50	1.33333	1	50	0		1	50	0	1	50	0.333333	1	50	0
1	40	0	1	40	1.33333	1	40	0		1	40	0	1	40	0	1	40	0
1	30	0	1	30	0.666667	1	30	1		1	30	0	1	30	1	1	30	0
1	20	0	1	20	1.66667	1	20	0		1	20	0	1	20	0	1	20	0
1	10	0	1	10	2	1	10	1.66667		1	10	0	1	10	0	1	10	0
1	0	0	1	0	1	1	0	0.333333		1	0	0	1	0	1.33333	1	0	0.666667
1.12246	70	0	1.12246	70	0	1.12246	70	0.333333		1.12246	70	0	1.12246	70	1.66667	1.12246	70	0
1.12246	60	3.33333	1.12246	60	1.33333	1.12246	60	0		1.12246	60	0	1.12246	60	0.666667	1.12246	60	0
1.12246	50	0	1.12246	50	1	1.12246	50	0		1.12246	50	0	1.12246	50	0	1.12246	50	0
1.12246	40	0	1.12246	40	2	1.12246	40	0		1.12246	40	0	1.12246	40	0	1.12246	40	0
1.12246	30	4.33333	1.12246	30	2	1.12246	30	1		1.12246	30	0	1.12246	30	0.333333	1.12246	30	0
1.12246	20	0	1.12246	20	0.666667	1.12246	20	0		1.12246	20	0	1.12246	20	0	1.12246	20	0
1.12246	10	0.333333	1.12246	10	2	1.12246	10	0		1.12246	10	0	1.12246	10	0.666667	1.12246	10	0
1.12246	0	1	1.12246	0	1	1.12246	0	0		1.12246	0	0.333333	1.12246	0	1.33333	1.12246	0	0
1.25992	70	0	1.25992	70	0.333333	1.25992	70	0.666667		1.25992	70	0	1.25992	70	0.666667	1.25992	70	0.333333
1.25992	60	3.66667	1.25992	60	2	1.25992	60	0		1.25992	60	0	1.25992	60	0.666667	1.25992	60	0.666667
1.25992	50	0	1.25992	50	0.666667	1.25992	50	3		1.25992	50	0	1.25992	50	0.333333	1.25992	50	0
1.25992	40	0	1.25992	40	1	1.25992	40	0		1.25992	40	0	1.25992	40	1	1.25992	40	0
1.25992	30	0	1.25992	30	1	1.25992	30	0.666667		1.25992	30	0	1.25992	30	0.333333	1.25992	30	0
1.25992	20	2.66667	1.25992	20	1	1.25992	20	0.666667		1.25992	20	0	1.25992	20	1	1.25992	20	0.333333
1.25992	10	0	1.25992	10	2	1.25992	10	0		1.25992	10	0	1.25992	10	0.666667	1.25992	10	0
1.25992	0	1	1.25992	0	1.33333	1.25992	0	0		1.25992	0	0	1.25992	0	0.333333	1.25992	0	0
1.41421	70	0	1.41421	70	0.333333	1.41421	70	1.33333		1.41421	70	0	1.41421	70	0.666667	1.41421	70	0
1.41421	60	0	1.41421	60	1.66667	1.41421	60	0		1.41421	60	0	1.41421	60	0	1.41421	60	0
1.41421	50	0	1.41421	50	0.666667	1.41421	50	0		1.41421	50	0	1.41421	50	1.33333	1.41421	50	0.333333
1.41421	40	0	1.41421	40	1.66667	1.41421	40	0		1.41421	40	0	1.41421	40	0.666667	1.41421	40	0
1.41421	30	0.333333	1.41421	30	1.33333	1.41421	30	1.33333		1.41421	30	0	1.41421	30	0.333333	1.41421	30	0
1.41421	20	0	1.41421	20	1.33333	1.41421	20	0.666667		1.41421	20	0	1.41421	20	0.666667	1.41421	20	0
1.41421	10	0	1.41421	10	1.66667	1.41421	10	0		1.41421	10	0	1.41421	10	0	1.41421	10	0.666667
1.41421	0	2.66667	1.41421	0	2.33333	1.41421	0	1		1.41421	0	0	1.41421	0	0	1.41421	0	0
1.5874	70	0	1.5874	70	0.666667	1.5874	70	0.666667		1.5874	70	0	1.5874	70	0.333333	1.5874	70	0
1.5874	60	0	1.5874	60	0.666667	1.5874	60	0.333333		1.5874	60	0	1.5874	60	0.666667	1.5874	60	0
1.5874	50	0	1.5874	50	2	1.5874	50	1.66667		1.5874	50	0	1.5874	50	0	1.5874	50	0.333333
1.5874	40	0	1.5874	40	3.66667	1.5874	40	5		1.5874	40	0	1.5874	40	0	1.5874	40	0
1.5874	30	0	1.5874	30	2	1.5874	30	1.66667		1.5874	30	0	1.5874	30	0	1.5874	30	0.333333
1.5874	20	3.33333	1.5874	20	1.33333	1.5874	20	9.33333		1.5874	20	0	1.5874	20	0.666667	1.5874	20	0
1.5874	10	0	1.5874	10	1.66667	1.5874	10	6		1.5874	10	0	1.5874	10	1	1.5874	10	0
1.5874	0	0.333333	1.5874	0	2	1.5874	0	5		1.5874	0	0	1.5874	0	0.666667	1.5874	0	0
1.7818	70	0.333333	1.7818	70	0.666667	1.7818	70	0.666667		1.7818	70	0.333333	1.7818	70	1	1.7818	70	0
1.7818	60	0	1.7818	60	1	1.7818	60	2		1.7818	60	0	1.7818	60	1	1.7818	60	0
1.7818	50	0	1.7818	50	1.33333	1.7818	50	0.666667		1.7818	50	0	1.7818	50	0	1.7818	50	0
1.7818	40	0	1.7818	40	1	1.7818	40	0		1.7818	40	0	1.7818	40	0	1.7818	40	0
1.7818	30	1.33333	1.7818	30	1.33333	1.7818	30	2		1.7818	30	0	1.7818	30	0.333333	1.7818	30	0
1.7818	20	0	1.7818	20	1.33333	1.7818	20	0		1.7818	20	0	1.7818	20	1	1.7818	20	0
1.7818	10	2.33333	1.7818	10	2	1.7818	10	0		1.7818	10	0	1.7818	10	0	1.7818	10	0
1.7818	0	2	1.7818	0	1.33333	1.7818	0	0		1.7818	0	0	1.7818	0	1	1.7818	0	0
2	70	0	2	70	0	2	70	0.333333		2	70	0	2	70	0	2	70	0
2	60	0	2	60	2.33333	2	60	0		2	60	0	2	60	0.333333	2	60	0.333333
2	50	0	2	50	1.66667	2	50	0		2	50	0	2	50	1	2	50	0
2	40	0	2	40	1.66667	2	40	0.666667		2	40	0	2	40	3	2	40	0
2	30	3.66667	2	30	0.666667	2	30	0.333333		2	30	0	2	30	0	2	30	0.333333
2	20	2	2	20	0.666667	2	20	0.333333		2	20	0	2	20	2.66667	2	20	0
2	10	0	2	10	1.66667	2	10	0		2	10	0	2	10	0	2	10	0
2	0	0	2	0	1.33333	2	0	0		2	0	0	2	0	0.333333	2	0	0
2.24492	70	0	2.24492	70	0.333333	2.24492	70	0		2.24492	70	0	2.24492	70	0.666667	2.24492	70	0
2.24492	60	0	2.24492	60	1.33333	2.24492	60	6.33333		2.24492	60	0	2.24492	60	0.333333	2.24492	60	0
2.24492	50	0	2.24492	50	0	2.24492	50	0		2.24492	50	0	2.24492	50	0	2.24492	50	1.33333
2.24492	40	0	2.24492	40	0.666667	2.24492	40	0.333333		2.24492	40	0	2.24492	40	1	2.24492	40	0
2.24492	30	0	2.24492	30	1.33333	2.24492	30	1.33333		2.24492	30	0	2.24492	30	1.66667	2.24492	30	0
2.24492	20	0	2.24492	20	1.66667	2.24492	20	0		2.24492	20	0	2.24492	20	1.33333	2.24492	20	0
2.24492	10	0	2.24492	10	2	2.24492	10	1		2.24492	10	0.333333	2.24492	10	0.333333	2.24492	10	0
2.24492	0	0	2.24492	0	2	2.24492	0	0		2.24492	0	0	2.24492	0	2.33333	2.24492	0	0
2.51984	70	0	2.51984	70	1	2.51984	70	0.333333		2.51984	70	0	2.51984	70	0.333333	2.51984	70	0
2.51984	60	0.666667	2.51984	60	1.66667	2.51984	60	0		2.51984	60	0	2.51984	60	0.666667	2.51984	60	0
2.51984	50	1.33333	2.51984	50	1	2.51984	50	0		2.51984	50	0	2.51984	50	0	2.51984	50	0
2.51984	40	0	2.51984	40	1	2.51984	40	0		2.51984	40	0	2.51984	40	0.333333	2.51984	40	0
2.51984	30	0	2.51984	30	1.66667	2.51984	30	2.33333		2.51984	30	0	2.51984	30	0	2.51984	30	0
2.51984	20	12	2.51984	20	1.33333	2.51984	20	0		2.51984	20	0	2.51984	20	0.333333	2.51984	20	0
2.51984	10	0	2.51984	10	3	2.51984	10	0		2.51984	10	0	2.51984	10	0	2.51984	10	0
2.51984	0	2	2.51984	0	1	2.51984	0	0		2.51984	0	0	2.51984	0	1.33333	2.51984	0	0
2.82843	70	0	2.82843	70	1.66667	2.82843	70	0.666667		2.82843	70	0	2.82843	70	1.66667	2.82843	70	0
2.82843	60	0	2.82843	60	1.66667	2.82843	60	1		2.82843	60	0	2.82843	60	0.333333	2.82843	60	0.666667
2.82843	50	1.66667	2.82843	50	1	2.82843	50	0		2.82843	50	0	2.82843	50	0.333333	2.82843	50	0
2.82843	40	0	2.82843	40	1.33333	2.82843	40	0.333333		2.82843	40	0	2.82843	40	0	2.82843	40	0
2.82843	30	0	2.82843	30	2.66667	2.82843	30	1.66667		2.82843	30	0	2.82843	30	2	2.82843	30	0
2.82843	20	2.66667	2.82843	20	1.33333	2.82843	20	2.33333		2.82843	20	0	2.82843	20	0	2.82843	20	0
2.82843	10	0	2.82843	10	1.33333	2.82843	10	0		2.82843	10	0	2.82843	10	3	2.82843	10	0
2.82843	0	0	2.82843	0	1.33333	2.82843	0	0		2.82843	0	0	2.82843	0	0	2.82843	0	0
3.1748	70	0	3.1748	70	0.333333	3.1748	70	0.333333		3.1748	70	0	3.1748	70	1.33333	3.1748	70	0
3.1748	60	0	3.1748	60	0.666667	3.1748	60	0		3.1748	60	0	3.1748	60	0	3.1748	60	0
3.1748	50	1.33333	3.1748	50	1.33333	3.1748	50	0		3.1748	50	0	3.1748	50	2.33333	3.1748	50	0
3.1748	40	0	3.1748	40	1.66667	3.1748	40	0		3.1748	40	0	3.1748	40	0.666667	3.1748	40	0
3.1748	30	3	3.1748	30	1.66667	3.1748	30	2		3.1748	30	0	3.1748	30	2	3.1748	30	0
3.1748	20	0	3.1748	20	1.33333	3.1748	20	0.333333		3.1748	20	0	3.1748	20	0.333333	3.1748	20	0
3.1748	10	2	3.1748	10	2	3.1748	10	1		3.1748	10	0	3.1748	10	0	3.1748	10	0
3.1748	0	0	3.1748	0	0.666667	3.1748	0	0		3.1748	0	0	3.1748	0	0.333333	3.1748	0	0
3.56359	70	0	3.56359	70	1	3.56359	70	0.666667		3.56359	70	0	3.56359	70	1.33333	3.56359	70	0
3.56359	60	0	3.56359	60	1.66667	3.56359	60	1.33333		3.56359	60	0	3.56359	60	1.33333	3.56359	60	0
3.56359	50	0	3.56359	50	0.666667	3.56359	50	0		3.56359	50	0	3.56359	50	0.666667	3.56359	50	0
3.56359	40	0	3.56359	40	0.666667	3.56359	40	0		3.56359	40	0	3.56359	40	1.66667	3.56359	40	0
3.56359	30	2	3.56359	30	2	3.56359	30	1.33333		3.56359	30	0	3.56359	30	0	3.56359	30	0
3.56359	20	3.66667	3.56359	20	0.666667	3.56359	20	0.666667		3.56359	20	0.333333	3.56359	20	1.33333	3.56359	20	0
3.56359	10	0	3.56359	10	2	3.56359	10	0		3.56359	10	0	3.56359	10	1.33333	3.56359	10	1
3.56359	0	3	3.56359	0	1.66667	3.56359	0	0		3.56359	0	0	3.56359	0	1.66667	3.56359	0	0
4	70	0.333333	4	70	0.333333	4	70	0.333333		4	70	0	4	70	0.666667	4	70	0
4	60	0.333333	4	60	1	4	60	0		4	60	0	4	60	0	4	60	0
4	50	0	4	50	1.33333	4	50	1		4	50	0	4	50	1.66667	4	50	0
4	40	0.666667	4	40	2.33333	4	40	0.333333		4	40	0	4	40	0	4	40	0
4	30	0	4	30	2	4	30	0.666667		4	30	0	4	30	0.333333	4	30	0.666667
4	20	0	4	20	1.33333	4	20	0		4	20	0	4	20	0.333333	4	20	0
4	10	3.33333	4	10	0.666667	4	10	0		4	10	0	4	10	1.66667	4	10	0.333333
4	0	0	4	0	2	4	0	0		4	0	0	4	0	0.333333	4	0	0
4.48985	70	0	4.48985	70	1.66667	4.48985	70	0.666667		4.48985	70	0	4.48985	70	2	4.48985	70	0
4.48985	60	0	4.48985	60	1.33333	4.48985	60	2.66667		4.48985	60	0	4.48985	60	3	4.48985	60	0.666667
4.48985	50	0.333333	4.48985	50	1.33333	4.48985	50	2.33333		4.48985	50	0	4.48985	50	0.666667	4.48985	50	0
4.48985	40	0.666667	4.48985	40	2	4.48985	40	0.666667		4.48985	40	0	4.48985	40	2.33333	4.48985	40	0
4.48985	30	0	4.48985	30	2	4.48985	30	0.333333		4.48985	30	0	4.48985	30	0	4.48985	30	0
4.48985	20	0	4.48985	20	1.66667	4.48985	20	0.333333		4.48985	20	0	4.48985	20	1.66667	4.48985	20	0
4.48985	10	3.33333	4.48985	10	1	4.48985	10	0		4.48985	10	0	4.48985	10	0	4.48985	10	0
4.48985	0	0	4.48985	0	3	4.48985	0	4		4.48985	0	0	4.48985	0	0	4.48985	0	0
5.03968	70	0	5.03968	70	0.333333	5.03968	70	0		5.03968	70	1	5.03968	70	0.666667	5.03968	70	0
5.03968	60	0	5.03968	60	2	5.03968	60	0.333333		5.03968	60	0	5.03968	60	2.33333	5.03968	60	0
5.03968	50	0	5.03968	50	1	5.03968	50	0		5.03968	50	0	5.03968	50	0.333333	5.03968	50	0
5.03968	40	0	5.03968	40	2	5.03968	40	0		5.03968	40	0	5.03968	40	1	5.03968	40	0.333333
5.03968	30	0	5.03968	30	1.33333	5.03968	30	3.66667		5.03968	30	0	5.03968	30	1.33333	5.03968	30	0
5.03968	20	0	5.03968	20	0.666667	5.03968	20	0		5.03968	20	0	5.03968	20	0.333333	5.03968	20	0
5.03968	10	0	5.03968	10	1	5.03968	10	5.33333		5.03968	10	0	5.03968	10	0	5.03968	10	0.333333
5.03968	0	3	5.03968	0	1	5.03968	0	0		5.03968	0	0.333333	5.03968	0	0	5.03968	0	0.333333
5.65685	70	0	5.65685	70	0.666667	5.65685	70	0.666667		5.65685	70	0	5.65685	70	0.333333	5.65685	70	0
5.65685	60	0	5.65685	60	1	5.65685	60	0		5.65685	60	0	5.65685	60	1.66667	5.65685	60	0.333333
5.65685	50	0	5.65685	50	0.666667	5.65685	50	0		5.65685	50	0	5.65685	50	0	5.65685	50	0
5.65685	40	0	5.65685	40	0	5.65685	40	0		5.65685	40	0	5.65685	40	4	5.65685	40	0
5.65685	30	0	5.65685	30	1.33333	5.65685	30	1.66667		5.65685	30	0	5.65685	30	0	5.65685	30	0
5.65685	20	0	5.65685	20	1.33333	5.65685	20	1.33333		5.65685	20	0	5.65685	20	0.666667	5.65685	20	0
5.65685	10	0	5.65685	10	0.333333	5.65685	10	0.666667		5.65685	10	0	5.65685	10	0.666667	5.65685	10	0
5.65685	0	0	5.65685	0	2	5.65685	0	2		5.65685	0	0	5.65685	0	0.333333	5.65685	0	0
6.3496	70	2	6.3496	70	1	6.3496	70	1		6.3496	70	0	6.3496	70	0.666667	6.3496	70	0
6.3496	60	0	6.3496	60	1	6.3496	60	0		6.3496	60	0	6.3496	60	0.333333	6.3496	60	0
6.3496	50	0.333333	6.3496	50	1.66667	6.3496	50	0.666667		6.3496	50	0	6.3496	50	0.333333	6.3496	50	0.333333
6.3496	40	0.333333	6.3496	40	2.33333	6.3496	40	0.666667		6.3496	40	0	6.3496	40	0.666667	6.3496	40	0
6.3496	30	0.666667	6.3496	30	2.33333	6.3496	30	0.666667		6.3496	30	0	6.3496	30	0.666667	6.3496	30	0
6.3496	20	4.33333	6.3496	20	1.33333	6.3496	20	0		6.3496	20	0	6.3496	20	0.666667	6.3496	20	0
6.3496	10	2	6.3496	10	3	6.3496	10	0		6.3496	10	0	6.3496	10	0.666667	6.3496	10	1.66667
6.3496	0	0	6.3496	0	0	6.3496	0	0		6.3496	0	0	6.3496	0	0	6.3496	0	0
7.12719	70	1.66667	7.12719	70	0.666667	7.12719	70	0.666667		7.12719	70	0	7.12719	70	2	7.12719	70	0
7.12719	60	0	7.12719	60	1.33333	7.12719	60	0.333333		7.12719	60	0	7.12719	60	0	7.12719	60	0
7.12719	50	0	7.12719	50	2	7.12719	50	0		7.12719	50	0	7.12719	50	1.66667	7.12719	50	0
7.12719	40	3.66667	7.12719	40	2.66667	7.12719	40	0.666667		7.12719	40	0	7.12719	40	0.333333	7.12719	40	0
7.12719	30	2.33333	7.12719	30	2	7.12719	30	0.666667		7.12719	30	0	7.12719	30	0.666667	7.12719	30	0
7.12719	20	0	7.12719	20	1.66667	7.12719	20	0		7.12719	20	0	7.12719	20	0.666667	7.12719	20	0
7.12719	10	2.33333	7.12719	10	1	7.12719	10	0		7.12719	10	0	7.12719	10	0.333333	7.12719	10	0
7.12719	0	0	7.12719	0	2	7.12719	0	5.33333		7.12719	0	0	7.12719	0	2.66667	7.12719	0	0
8	70	3	8	70	1.66667	8	70	3.33333		8	70	0	8	70	0.666667	8	70	0
8	60	0	8	60	2.66667	8	60	1.66667		8	60	0	8	60	2.66667	8	60	0
8	50	3	8	50	0.333333	8	50	1		8	50	0	8	50	1.66667	8	50	0
8	40	0	8	40	1.33333	8	40	0		8	40	0	8	40	0.333333	8	40	0
8	30	0	8	30	2.33333	8	30	0.666667		8	30	0	8	30	0.333333	8	30	0
8	20	1.33333	8	20	1	8	20	0		8	20	0	8	20	1	8	20	0
8	10	6	8	10	2.33333	8	10	0		8	10	0	8	10	0.333333	8	10	0
8	0	0	8	0	2	8	0	4.33333		8	0	0	8	0	4.33333	8	0	0
8.9797	70	8.33333	8.9797	70	2	8.9797	70	6		8.9797	70	0	8.9797	70	0	8.9797	70	0
8.9797	60	3.33333	8.9797	60	2.33333	8.9797	60	1.66667		8.9797	60	0	8.9797	60	0	8.9797	60	0
8.9797	50	1	8.9797	50	1.33333	8.9797	50	0.333333		8.9797	50	0	8.9797	50	1.66667	8.9797	50	0.333333
8.9797	40	1.66667	8.9797	40	1	8.9797	40	1		8.9797	40	0	8.9797	40	0.666667	8.9797	40	0
8.9797	30	1	8.9797	30	1.66667	8.9797	30	0.333333		8.9797	30	0	8.9797	30	1.66667	8.9797	30	0.333333
8.9797	20	0.666667	8.9797	20	1.66667	8.9797	20	0		8.9797	20	0	8.9797	20	2	8.9797	20	0
8.9797	10	1.66667	8.9797	10	3	8.9797	10	0		8.9797	10	0	8.9797	10	0.666667	8.9797	10	0
8.9797	0	0	8.9797	0	0.666667	8.9797	0	3.33333		8.9797	0	0	8.9797	0	0	8.9797	0	0
10.0794	70	3	10.0794	70	2.33333	10.0794	70	1.66667		10.0794	70	0	10.0794	70	0.333333	10.0794	70	1
10.0794	60	10.3333	10.0794	60	2	10.0794	60	2		10.0794	60	0	10.0794	60	2	10.0794	60	2
10.0794	50	2.66667	10.0794	50	0.666667	10.0794	50	5.33333		10.0794	50	0	10.0794	50	1	10.0794	50	0
10.0794	40	2	10.0794	40	2.33333	10.0794	40	0.333333		10.0794	40	0.333333	10.0794	40	0.666667	10.0794	40	0
10.0794	30	0	10.0794	30	0	10.0794	30	1.66667		10.0794	30	0	10.0794	30	0	10.0794	30	0
10.0794	20	0.666667	10.0794	20	1	10.0794	20	0.333333		10.0794	20	0	10.0794	20	0.333333	10.0794	20	0
10.0794	10	0	10.0794	10	1.66667	10.0794	10	0		10.0794	10	0	10.0794	10	1	10.0794	10	0.333333
10.0794	0	4.66667	10.0794	0	1	10.0794	0	2.66667		10.0794	0	0	10.0794	0	0	10.0794	0	0.333333
11.3137	70	6.66667	11.3137	70	1.33333	11.3137	70	2.33333		11.3137	70	4	11.3137	70	3	11.3137	70	1
11.3137	60	4.66667	11.3137	60	1.66667	11.3137	60	5		11.3137	60	0.333333	11.3137	60	2.66667	11.3137	60	0
11.3137	50	6	11.3137	50	1.33333	11.3137	50	1		11.3137	50	0	11.3137	50	2	11.3137	50	0
11.3137	40	3.66667	11.3137	40	1	11.3137	40	2		11.3137	40	0	11.3137	40	0.333333	11.3137	40	0
11.3137	30	2	11.3137	30	1.66667	11.3137	30	1		11.3137	30	0	11.3137	30	0	11.3137	30	0.333333
11.3137	20	0	11.3137	20	2	11.3137	20	6.33333		11.3137	20	0	11.3137	20	1	11.3137	20	0
11.3137	10	0.333333	11.3137	10	1	11.3137	10	0.666667		11.3137	10	0	11.3137	10	0.666667	11.3137	10	1
11.3137	0	0	11.3137	0	1.33333	11.3137	0	3.33333		11.3137	0	0	11.3137	0	1.66667	11.3137	0	0.333333
12.6992	70	3	12.6992	70	2.33333	12.6992	70	2.33333		12.6992	70	0.666667	12.6992	70	2.33333	12.6992	70	3
12.6992	60	6.66667	12.6992	60	2.33333	12.6992	60	1		12.6992	60	0	12.6992	60	0.666667	12.6992	60	0.666667
12.6992	50	6.33333	12.6992	50	0.333333	12.6992	50	1.33333		12.6992	50	0	12.6992	50	2.33333	12.6992	50	0
12.6992	40	0.333333	12.6992	40	2	12.6992	40	0.333333		12.6992	40	0	12.6992	40	5	12.6992	40	0
12.6992	30	0.333333	12.6992	30	2	12.6992	30	1		12.6992	30	0	12.6992	30	1.66667	12.6992	30	0
12.6992	20	0	12.6992	20	1	12.6992	20	0		12.6992	20	0	12.6992	20	0.666667	12.6992	20	0
12.6992	10	0	12.6992	10	1.33333	12.6992	10	0		12.6992	10	0.333333	12.6992	10	0.333333	12.6992	10	0
12.6992	0	1	12.6992	0	1	12.6992	0	0		12.6992	0	0	12.6992	0	0.333333	12.6992	0	0
14.2544	70	6.66667	14.2544	70	1.33333	14.2544	70	2.66667		14.2544	70	2.66667	14.2544	70	4.66667	14.2544	70	4.33333
14.2544	60	4.66667	14.2544	60	2.66667	14.2544	60	2.66667		14.2544	60	1.33333	14.2544	60	1.33333	14.2544	60	0
14.2544	50	5.66667	14.2544	50	1.33333	14.2544	50	1		14.2544	50	0	14.2544	50	0.666667	14.2544	50	0
14.2544	40	1	14.2544	40	2.33333	14.2544	40	1.33333		14.2544	40	0	14.2544	40	2.66667	14.2544	40	0
14.2544	30	0	14.2544	30	1	14.2544	30	1.33333		14.2544	30	0.333333	14.2544	30	0.333333	14.2544	30	0
14.2544	20	0	14.2544	20	1.33333	14.2544	20	1.66667		14.2544	20	0	14.2544	20	0	14.2544	20	0
14.2544	10	0	14.2544	10	2	14.2544	10	0		14.2544	10	0	14.2544	10	0	14.2544	10	0.333333
14.2544	0	0.333333	14.2544	0	1	14.2544	0	0		14.2544	0	0	14.2544	0	0.666667	14.2544	0	0
16	70	1.66667	16	70	0.666667	16	70	1.66667		16	70	2.66667	16	70	2.33333	16	70	2
16	60	9.33333	16	60	2.66667	16	60	1.66667		16	60	1.66667	16	60	1.33333	16	60	1
16	50	3.33333	16	50	1.66667	16	50	1.33333		16	50	0	16	50	2.66667	16	50	0.333333
16	40	3.33333	16	40	1.33333	16	40	0.333333		16	40	0	16	40	0	16	40	0
16	30	10	16	30	2.66667	16	30	0.666667		16	30	0.333333	16	30	1.33333	16	30	0
16	20	0	16	20	2	16	20	0.333333		16	20	0	16	20	1.33333	16	20	0
16	10	1	16	10	3.33333	16	10	0		16	10	0	16	10	0	16	10	0
16	0	0	16	0	2.66667	16	0	3.66667		16	0	0	16	0	1	16	0	0.333333
17.9594	70	2	17.9594	70	1.66667	17.9594	70	2.66667		17.9594	70	2	17.9594	70	1.33333	17.9594	70	1
17.9594	60	5.66667	17.9594	60	2.66667	17.9594	60	8		17.9594	60	0	17.9594	60	1.33333	17.9594	60	0
17.9594	50	0.333333	17.9594	50	1	17.9594	50	0.666667		17.9594	50	0	17.9594	50	1.66667	17.9594	50	1
17.9594	40	2.66667	17.9594	40	2.33333	17.9594	40	0		17.9594	40	0.333333	17.9594	40	0.666667	17.9594	40	0
17.9594	30	5.66667	17.9594	30	2	17.9594	30	2.33333		17.9594	30	0	17.9594	30	0.333333	17.9594	30	0
17.9594	20	0.333333	17.9594	20	1.33333	17.9594	20	0		17.9594	20	0	17.9594	20	0.666667	17.9594	20	0
17.9594	10	0	17.9594	10	1.33333	17.9594	10	0		17.9594	10	0	17.9594	10	0.333333	17.9594	10	0
17.9594	0	3.33333	17.9594	0	2.33333	17.9594	0	0		17.9594	0	0	17.9594	0	0.333333	17.9594	0	0
20.1587	70	9.33333	20.1587	70	0	20.1587	70	2		20.1587	70	0	20.1587	70	3.33333	20.1587	70	0
20.1587	60	4.66667	20.1587	60	1.66667	20.1587	60	7		20.1587	60	0	20.1587	60	1.33333	20.1587	60	0
20.1587	50	0.333333	20.1587	50	1	20.1587	50	3		20.1587	50	0	20.1587	50	2.66667	20.1587	50	0
20.1587	40	5	20.1587	40	2	20.1587	40	3		20.1587	40	0	20.1587	40	0	20.1587	40	0
20.1587	30	0	20.1587	30	1.66667	20.1587	30	1.33333		20.1587	30	0	20.1587	30	0.666667	20.1587	30	0
20.1587	20	5.33333	20.1587	20	1.33333	20.1587	20	0		20.1587	20	0	20.1587	20	0.666667	20.1587	20	0.333333
20.1587	10	0.333333	20.1587	10	1	20.1587	10	0		20.1587	10	0	20.1587	10	0	20.1587	10	0
20.1587	0	0	20.1587	0	1.33333	20.1587	0	0		20.1587	0	0	20.1587	0	0.666667	20.1587	0	1.33333
22.6274	70	1.33333	22.6274	70	2	22.6274	70	7		22.6274	70	0.666667	22.6274	70	3.66667	22.6274	70	0.333333
22.6274	60	1	22.6274	60	1.33333	22.6274	60	6.33333		22.6274	60	0	22.6274	60	1.66667	22.6274	60	1
22.6274	50	3.33333	22.6274	50	1.66667	22.6274	50	4.66667		22.6274	50	0	22.6274	50	3.66667	22.6274	50	0.333333
22.6274	40	0	22.6274	40	1	22.6274	40	0.666667		22.6274	40	0	22.6274	40	1	22.6274	40	0
22.6274	30	0	22.6274	30	3.33333	22.6274	30	2.66667		22.6274	30	0	22.6274	30	1	22.6274	30	0.333333
22.6274	20	2	22.6274	20	1.66667	22.6274	20	1		22.6274	20	0	22.6274	20	0.333333	22.6274	20	0
22.6274	10	3.33333	22.6274	10	0.666667	22.6274	10	0		22.6274	10	0	22.6274	10	2	22.6274	10	0.666667
22.6274	0	2.66667	22.6274	0	2	22.6274	0	0.333333		22.6274	0	0	22.6274	0	0.333333	22.6274	0	1.66667
25.3984	70	7	25.3984	70	0.666667	25.3984	70	6.33333		25.3984	70	0	25.3984	70	3	25.3984	70	1
25.3984	60	5	25.3984	60	1.33333	25.3984	60	4		25.3984	60	1	25.3984	60	3	25.3984	60	1
25.3984	50	0	25.3984	50	0.666667	25.3984	50	2		25.3984	50	0	25.3984	50	2.66667	25.3984	50	0
25.3984	40	5	25.3984	40	1.66667	25.3984	40	1.66667		25.3984	40	0	25.3984	40	2	25.3984	40	0.333333
25.3984	30	5	25.3984	30	2	25.3984	30	2.66667		25.3984	30	0	25.3984	30	1.66667	25.3984	30	0
25.3984	20	0	25.3984	20	2	25.3984	20	0.666667		25.3984	20	0	25.3984	20	0.333333	25.3984	20	0
25.3984	10	3	25.3984	10	1	25.3984	10	0		25.3984	10	0	25.3984	10	1.33333	25.3984	10	0
25.3984	0	0.666667	25.3984	0	2	25.3984	0	0		25.3984	0	0	25.3984	0	0.333333	25.3984	0	0.333333
28.5088	70	5.33333	28.5088	70	0	28.5088	70	1.66667		28.5088	70	0	28.5088	70	2.66667	28.5088	70	0.333333
28.5088	60	3	28.5088	60	1.66667	28.5088	60	1.33333		28.5088	60	0	28.5088	60	3.66667	28.5088	60	0.333333
28.5088	50	1.33333	28.5088	50	2	28.5088	50	2.33333		28.5088	50	0	28.5088	50	3.33333	28.5088	50	0
28.5088	40	1.33333	28.5088	40	3	28.5088	40	1.33333		28.5088	40	0	28.5088	40	3.33333	28.5088	40	0
28.5088	30	1.33333	28.5088	30	2.33333	28.5088	30	2.66667		28.5088	30	0	28.5088	30	2	28.5088	30	0
28.5088	20	5.33333	28.5088	20	1.33333	28.5088	20	0.666667		28.5088	20	0	28.5088	20	0	28.5088	20	0
28.5088	10	0	28.5088	10	2.33333	28.5088	10	0		28.5088	10	0	28.5088	10	4	28.5088	10	0
28.5088	0	2.66667	28.5088	0	2.33333	28.5088	0	0.333333		28.5088	0	0	28.5088	0	0.666667	28.5088	0	1
32	70	1	32	70	0.666667	32	70	4.33333		32	70	0	32	70	4.66667	32	70	1.33333
32	60	6	32	60	1.33333	32	60	5.33333		32	60	0	32	60	1.66667	32	60	0.333333
32	50	2.66667	32	50	1	32	50	4.33333		32	50	0	32	50	4.66667	32	50	0
32	40	0	32	40	2	32	40	1.33333		32	40	0	32	40	1	32	40	0
32	30	0	32	30	2	32	30	2.33333		32	30	0	32	30	0	32	30	0.333333
32	20	0	32	20	2	32	20	0		32	20	0	32	20	0.666667	32	20	0
32	10	1.66667	32	10	2	32	10	0		32	10	0	32	10	0	32	10	0
32	0	0	32	0	2	32	0	2.66667		32	0	0	32	0	0.666667	32	0	0
35.9188	70	1	35.9188	70	0.333333	35.9188	70	3		35.9188	70	0.333333	35.9188	70	4.66667	35.9188	70	1.33333
35.9188	60	2	35.9188	60	1.66667	35.9188	60	1.66667		35.9188	60	0	35.9188	60	2	35.9188	60	0
35.9188	50	0	35.9188	50	2	35.9188	50	1		35.9188	50	0	35.9188	50	2	35.9188	50	1
35.9188	40	3.66667	35.9188	40	1.66667	35.9188	40	0.666667		35.9188	40	0	35.9188	40	2.33333	35.9188	40	0.333333
35.9188	30	0	35.9188	30	0.666667	35.9188	30	0.666667		35.9188	30	0	35.9188	30	3	35.9188	30	0.333333
35.9188	20	0	35.9188	20	1.33333	35.9188	20	2.33333		35.9188	20	0	35.9188	20	0.666667	35.9188	20	0
35.9188	10	0	35.9188	10	1.66667	35.9188	10	0		35.9188	10	0	35.9188	10	2.33333	35.9188	10	0
35.9188	0	0.333333	35.9188	0	1.33333	35.9188	0	0		35.9188	0	0	35.9188	0	2.33333	35.9188	0	0.333333
40.3175	70	0.666667	40.3175	70	0.666667	40.3175	70	0.333333		40.3175	70	2	40.3175	70	2.66667	40.3175	70	0.333333
40.3175	60	1	40.3175	60	1.33333	40.3175	60	0.333333		40.3175	60	1.66667	40.3175	60	3.66667	40.3175	60	0
40.3175	50	0	40.3175	50	0.333333	40.3175	50	1.66667		40.3175	50	0.333333	40.3175	50	4	40.3175	50	0.333333
40.3175	40	1	40.3175	40	1.66667	40.3175	40	0		40.3175	40	0	40.3175	40	0	40.3175	40	0
40.3175	30	0	40.3175	30	2	40.3175	30	0.333333		40.3175	30	0	40.3175	30	0.333333	40.3175	30	0
40.3175	20	2.66667	40.3175	20	1.33333	40.3175	20	0		40.3175	20	0	40.3175	20	0.333333	40.3175	20	0
40.3175	10	0	40.3175	10	0.333333	40.3175	10	0		40.3175	10	0	40.3175	10	0	40.3175	10	1
40.3175	0	0	40.3175	0	1.66667	40.3175	0	0		40.3175	0	0	40.3175	0	0	40.3175	0	1.33333

## Sheet: Figure 3 rasters
Figure 3A																			Figure 3B
Control						Effect						Recovery							Control						Effect						Recovery
Sequence 1			Sequence 2			Sequence 1			Sequence 2			Sequence 1			Sequence 2				Sequence 1			Sequence 2			Sequence 1			Sequence 2			Sequence 1			Sequence 2
Trial #	Frequency (Hz)	Spike Time (ms)	Trial #	Frequency (Hz)	Spike Time (ms)	Trial #	Frequency (Hz)	Spike Time (ms)	Trial #	Frequency (Hz)	Spike Time (ms)	Trial #	Frequency (Hz)	Spike Time (ms)	Trial #	Frequency (Hz)	Spike Time (ms)		Trial #	Frequency (Hz)	Spike Time (ms)	Trial #	Frequency (Hz)	Spike Time (ms)	Trial #	Frequency (Hz)	Spike Time (ms)	Trial #	Frequency (Hz)	Spike Time (ms)	Trial #	Frequency (Hz)	Spike Time (ms)	Trial #	Frequency (Hz)	Spike Time (ms)
1	10800	14.96	1	15300	19.44	1	10800	15.23	1	15300	40.47	1	10800	16.35	1	15300	18.47		1	11400	112.76	1	16100	34.41	1	11400	45.02	1	16100	36.4	1	11400	25.63	1	16100	30.43
1	10800	17.85	1	15300	23.75	2	10800	1.5	2	15300	160.44	1	10800	24.26	1	15300	25.4		1	11400	160.51	2	16100	169.82	1	11400	76.89	1	16100	60.52	1	11400	28.52	1	16100	36.39
1	10800	26.55	1	15300	31.14	2	10800	19.02	2	15300	169.88	1	10800	29.39	1	15300	30.93		1	11400	175.27	3	16100	155.56	1	11400	90.8	1	16100	198.67	1	11400	34.3	1	16100	46.05
1	10800	35.45	1	15300	34.68	3	10800	15.84	2	15300	173.27	1	10800	33.09	1	15300	34.41		2	11400	107.44	3	16100	159.36	2	11400	4.1	2	16100	27.7	1	11400	59.39	1	16100	215.65
1	10800	38.19	1	15300	39.01	3	10800	20.41	3	15300	3.24	1	10800	36.05	1	15300	37.16		2	11400	111.02	3	16100	167.74	2	11400	18.58	2	16100	30.48	1	11400	72.5	1	16100	233.01
1	10800	41.9	1	15300	42.16	3	10800	90.27	3	15300	7.84	1	10800	38.85	1	15300	41.2		2	11400	113.73	3	16100	186.03	2	11400	22.97	2	16100	39.13	2	11400	0.78	2	16100	4.7
1	10800	46.8	1	15300	45.2	27	10800	115.8	28	15300	84.1	1	10800	46.8	1	15300	44.18		6	11400	63.16	6	16100	127.58	2	11400	43.37	3	16100	43.23	2	11400	4.19	2	16100	61.6
1	10800	50.55	1	15300	47.84	27	10800	187.57	53	15300	182.15	1	10800	49.91	1	15300	51.22		6	11400	116.34	8	16100	66.29	2	11400	78.95	3	16100	71.2	2	11400	20.03	2	16100	179.53
1	10800	53.18	1	15300	51.3	27	10800	194.87	53	15300	186.9	1	10800	53.6	1	15300	53.85		6	11400	121.9	8	16100	81.22	2	11400	97.77	4	16100	38.35	2	11400	24.93	2	16100	191.88
1	10800	55.98	1	15300	53.93	62	15300	49.83	54	15300	97.46	1	10800	56.35	1	15300	57.45		10	11400	95.01	8	16100	108.7	3	11400	48.6	5	16100	66.56	2	11400	27.74	2	16100	199.15
1	10800	59.31	1	15300	57.7	63	10800	20.15	54	15300	100.85	1	10800	59.43	1	15300	60.63		10	11400	100.54	8	16100	112.71	3	11400	53.02	5	16100	79.91	2	11400	33.39	4	16100	43.59
1	10800	64.58	1	15300	60.85	63	10800	45.08	55	15300	99.77	1	10800	64.51	1	15300	63.26		10	11400	106.47	8	16100	133.88	3	11400	81.85	6	16100	39.7	2	11400	47	5	16100	38.09
1	10800	68.44	1	15300	63.59	63	10800	187.55	92	15300	228.88	1	10800	68.03	1	15300	66.6		10	11400	116.72	12	16100	92.75	3	11400	113.14	7	16100	51.62	2	11400	97.92	5	16100	134.37
1	10800	73.18	1	15300	66.46	64	10800	72.37	103	10800	160.53	1	10800	71.14	1	15300	70.26		10	11400	120.45	12	16100	99.81	4	11400	54.37	10	16100	17.17	2	11400	122.08	6	16100	49.32
1	10800	154.85	1	15300	71.97	96	15300	94.2	104	15300	180.05	1	10800	74.41	1	15300	73.04		10	11400	163.27	12	16100	116.91	4	11400	93.73	12	16100	27.12	3	11400	35.94	7	16100	48.28
1	10800	223.03	1	15300	75.93	126	15300	24.2	208	15300	83.76	1	10800	78.59	1	15300	77.13		10	11400	171.56	12	16100	125.99	6	11400	36.86	12	16100	196.25	3	11400	40.68	7	16100	71.36
1	10800	242.16	1	15300	79.24	136	10800	22.93	209	15300	94.09	1	10800	81.72	1	15300	80.02		13	11400	106.97	14	16100	163.22	6	11400	63.58	19	16100	23.69	3	11400	45.87	8	16100	61.79
2	10800	19.9	1	15300	207.52	189	10800	124.34	225	15300	93.99	1	10800	86.96	1	15300	83.56		15	11400	10.38	14	16100	171.23	7	11400	145.95	19	16100	48.82	3	11400	82.64	8	16100	98.87
2	10800	23.62	1	15300	213.19	194	10800	56.55	245	15300	172.9	1	10800	89.92	1	15300	88.54		15	11400	25.42	14	16100	180.77	9	11400	27.66	19	16100	231.37	3	11400	90.67	8	16100	152.28
2	10800	27.39	1	15300	235.22	243	10800	204.56	245	15300	179.21	1	10800	95.32	1	15300	91.55		15	11400	38.16	14	16100	186.05	9	11400	99.43	24	16100	207.82	4	11400	46.75	9	16100	62.13
2	10800	120.79	1	15300	245.59	243	10800	209.44	246	15300	123.09	2	10800	94.93	1	15300	111.86		15	11400	63.28	14	16100	192.61	13	11400	1.95	26	16100	239.55	4	11400	50.99	10	16100	59.03
2	10800	153.77	2	15300	24.77	255	15300	40.19	246	15300	202.74	3	10800	149.38	2	15300	18.29		21	11400	4.78	14	16100	196.07	13	11400	173.4	27	16100	113.73	4	11400	62.63	10	16100	104.59
2	10800	176.13	2	15300	162.04	259	10800	111.48	281	15300	86.66	3	10800	157.63	2	15300	107.39		21	11400	11.27	16	16100	58.31	17	11400	206.77	27	16100	191.97	4	11400	75.67	11	16100	31.64
2	10800	182.79	2	15300	215.81	262	10800	72.69	281	15300	90.46	3	10800	162.3	2	15300	142.26		21	11400	14.49	16	16100	78.96	18	11400	81.64	29	16100	135	4	11400	97.05	11	16100	44.5
2	10800	191.65	3	15300	75.56	262	10800	79.78	281	15300	106.34	14	15300	49.17	2	15300	154.5		21	11400	17.37	17	11400	171.96	20	16100	31.37	29	16100	185.63	5	11400	38.86	11	16100	49.76
2	10800	244.73	3	15300	78.66	262	10800	90.63	281	15300	123.65	24	10800	146.35	2	15300	158.71		21	11400	23.74	18	16100	60.3	20	16100	55.11	32	16100	110.54	5	11400	42.61	11	16100	67.96
3	10800	0.53	3	15300	130.45	262	10800	96.41	282	15300	104.35	32	15300	37.98	2	15300	171.74		21	11400	75.73	18	16100	90.2	20	16100	58.35	34	16100	193.63	5	11400	76.1	12	16100	44.83
3	10800	93.33	16	15300	129.36	263	10800	23.24	320	10800	139.86	32	15300	44.26	2	15300	175.04		23	11400	189.56	18	16100	109.21	21	11400	121.51	37	16100	35.68	6	11400	38.47	13	16100	53.51
19	15300	21.43	17	15300	214.95	263	10800	211.78	321	15300	191.21	32	15300	46.89	3	15300	120.22		23	11400	207.51	18	16100	112.27	24	11400	113.75	38	16100	51.63	6	11400	41.82	13	16100	58.33
19	15300	37.38	17	15300	218.25	264	15300	18.99	321	15300	204.32	32	15300	49.87	3	15300	168.86		24	16100	30.88	18	16100	119.08	27	11400	131.79	39	16100	216.62	6	11400	61.33	14	16100	68.84
19	15300	40.01	17	15300	220.88	273	15300	168.25	322	15300	122.79	32	15300	54.22	3	15300	177.5		27	11400	191.11	21	16100	85.63	27	11400	190.55	42	16100	173.57	6	11400	75.51	15	11400	41.05
19	15300	46.27	17	15300	225.59	299	10800	237.59	322	15300	126.32	32	15300	57.19	3	15300	187.18		27	11400	205.04	22	16100	149.15	29	16100	49.4	43	16100	26.54	6	11400	100.73	15	11400	56.75
19	15300	49.45	17	15300	231.49	299	10800	240.22	322	15300	172.42	32	15300	60.26	3	15300	189.82		27	11400	208.4	26	16100	154.42	29	16100	57.02	43	16100	106.6	7	11400	46.66	15	11400	86.75
19	15300	53.6	17	15300	234.5	300	15300	177.47	323	15300	112.32	32	15300	63.76	3	15300	193.24		28	11400	17.93	26	16100	158.58	29	16100	78.65	47	16100	161.79	7	11400	50.46	16	16100	3.35
19	15300	56.98	17	15300	237.47	300	15300	220.3	335	10800	145.75	32	15300	67	3	15300	200.25		28	11400	31.03	26	16100	172.93	30	11400	19.67	48	16100	8.52	7	11400	66.19	16	16100	197.14
19	15300	60.2	17	15300	240.83	301	10800	81.74	354	10800	225.09	32	15300	70.13	3	15300	203.44		31	11400	100.28	31	16100	28.82	32	11400	190.11	50	16100	21.63	7	11400	77.51	16	16100	209.12
19	15300	63.84	17	15300	243.48	301	10800	84.82				32	15300	72.76	3	15300	210.32		31	11400	113.24	31	16100	40.08	37	11400	145.47	50	16100	118.08	7	11400	85.34	17	16100	221.53
19	15300	67.11	17	15300	246.22	301	10800	88.36				32	15300	75.59	16	15300	120.48		31	11400	118.46	31	16100	75.1	37	11400	180.62	56	16100	19.57	8	11400	40.27	19	16100	38.9
19	15300	70.42	18	15300	199.68	301	10800	207.4				32	15300	79.31	16	15300	123.43		32	16100	43.65	31	16100	153.58	40	16100	148.29	57	16100	32.39	8	11400	44.04	20	16100	43.59
19	15300	73.06	18	15300	215.72	324	10800	194.51				32	15300	84.62	16	15300	126.57		32	16100	141.83	31	16100	163.86	42	11400	169.61	58	16100	52.44	8	11400	57.88	20	16100	62.32
19	15300	77.01	18	15300	229.23	325	10800	29.19				32	15300	87.65	16	15300	129.82		32	16100	145.5	31	16100	168.19	43	11400	137.79	58	16100	77.13	8	11400	100.77	20	16100	65.16
19	15300	83.64	18	15300	236.89	325	10800	143.17				32	15300	90.95	16	15300	132.45		32	16100	152.94	31	16100	227.22	44	11400	222.11	59	16100	54.56	9	11400	45.78	21	16100	40.85
19	15300	92.31	18	15300	244.3							32	15300	93.78	16	15300	135.3		32	16100	156.6	36	11400	7.39	46	11400	215.5	59	16100	205.13	10	11400	28.64	21	16100	156.03
19	15300	98.92	19	15300	97.18							32	15300	99.13	16	15300	139.94		38	11400	45.54	36	11400	21.19	50	11400	50.88	60	16100	219.48	10	11400	58.81	22	16100	58.9
19	15300	236.43	19	15300	232.82							33	10800	71.54	16	15300	142.91		38	11400	52.89	36	11400	35.6	52	11400	218.46	61	16100	203.38	10	11400	73.47	23	16100	37.37
20	10800	29.77	19	15300	235.79							33	10800	99.74	16	15300	146.03		38	11400	66.51	36	11400	209.33	54	16100	37.2	64	11400	55.99	11	11400	40.69	24	16100	21.1
20	10800	185.38	19	15300	242.84							33	10800	103.1	16	15300	150.56		38	11400	71.68	36	11400	217.56	54	16100	57.46	64	11400	133.17	11	11400	228.93	24	16100	225.68
20	10800	196.15	19	15300	246.15							33	10800	105.73	16	15300	171.32		38	11400	85.31	36	11400	221.64	54	16100	71.7	70	16100	23.78	12	11400	57.4	24	16100	233.8
21	10800	17.89	20	15300	0.23							33	10800	108.65	18	15300	111.6		39	16100	218.72	36	11400	236.86	55	11400	62.8	73	16100	59.27	12	11400	65.72	25	16100	248.38
24	15300	27.54	20	15300	6.33							33	10800	112.04	19	15300	106.84		39	16100	226.03	36	11400	240.06	55	11400	84.25	73	16100	65.54	12	11400	95.37	27	11400	35.28
36	10800	95.46	20	15300	13.2							33	10800	116.16	28	15300	46.77		39	16100	237.2	36	11400	248.09	55	11400	114.25	73	16100	69.22	13	11400	24.75	27	11400	51.78
36	10800	99.61	20	15300	132.33							33	10800	119.69	28	15300	64.47		42	11400	7.91	37	16100	25.62	56	11400	5	73	16100	75.39	13	11400	249.4	28	16100	28.13
36	10800	108.28	21	10800	20.38							33	10800	122.36	28	15300	67.41		42	11400	16.49	39	16100	58.08	56	11400	40.84	73	16100	154.03	14	16100	22.52	28	16100	247.34
41	10800	174.8	36	10800	45.59							33	10800	126.02	28	15300	70.08		42	11400	19.6	39	16100	64.53	56	11400	106.68	74	16100	40.85	15	11400	2.39	29	16100	53.97
41	10800	182.51	36	10800	52.29							33	10800	130.51	28	15300	74.4		42	11400	22.96	39	16100	70.85	62	11400	71.88	74	16100	75.61	15	11400	242.94	29	16100	109.62
44	15300	20.01	36	10800	71.95							33	10800	133.75	28	15300	78.85		42	11400	26.48	39	16100	85.8	71	16100	45.03	75	16100	43.65	15	11400	246.9	31	11400	36.08
44	15300	22.68	36	10800	78.64							33	10800	139.38	28	15300	82.48		42	11400	29.89	39	16100	99.24	71	16100	84.51	76	16100	49.38	16	11400	88.99	31	11400	40.79
44	15300	25.54	36	10800	88.99							33	10800	144.2	28	15300	85.23		42	11400	52.17	41	16100	59.51	72	11400	0.84	80	16100	103.26	16	11400	95.92	31	11400	44.35
44	15300	29	47	15300	40.82							34	10800	98.65	28	15300	90.68		42	11400	54.95	41	16100	149.33	72	11400	53.54	81	16100	22.27	16	11400	235.59	31	11400	48.02
44	15300	33.83	47	15300	46.12							35	10800	96.35	28	15300	100.62		44	11400	87.81	41	16100	179.74	72	11400	77.11	83	16100	220.33	17	11400	64.38	31	11400	189.67
44	15300	39.14	47	15300	49.34							45	15300	51.4	28	15300	111.81		44	11400	94.9	41	16100	215.08	74	11400	217.16	84	11400	43.33	17	11400	176.2	32	16100	63.54
44	15300	45.15	47	15300	53.52							45	15300	55.31	29	15300	30.13		44	11400	119.61	41	16100	219.35	76	16100	124.64	88	16100	92.29	17	11400	185.62	32	16100	214.87
44	15300	49.17	47	15300	56.42							45	15300	66.72	29	15300	56.55		44	11400	125.14	44	16100	21.87	76	16100	127.86	91	16100	41.11	18	11400	92.23	34	16100	14
44	15300	53.42	47	15300	59.7							45	15300	97.71	29	15300	77.29		44	11400	143.82	44	16100	27.17	78	11400	80.05	93	16100	58.86	18	11400	222.44	34	16100	23.24
44	15300	58.46	47	15300	62.39							45	15300	107.76	29	15300	81.04		44	11400	159.92	45	16100	55.24	83	11400	221.91	93	16100	69.19	19	11400	49.17	35	16100	29.81
44	15300	62.32	47	15300	65.82							51	15300	43.18	29	15300	88.43		45	11400	66.14	45	16100	59.95	89	11400	79.44	93	16100	129.16	19	11400	55.04	36	16100	51.29
44	15300	64.95	47	15300	69.11							51	15300	48.26	29	15300	92.49		45	11400	73.68	45	16100	97.63	89	11400	203.65	94	16100	123.65	19	11400	61.88	36	16100	77.9
44	15300	67.67	47	15300	75.49							51	15300	55.85	29	15300	97.58		45	11400	83.51	45	16100	111.16	90	11400	178.44	94	16100	131.45	19	11400	226.15	36	16100	84.98
44	15300	70.31	47	15300	82.57							51	15300	58.48	29	15300	108.26		47	11400	150.24	45	16100	136.83	91	16100	32.92	95	16100	171.34	20	11400	24.31	37	16100	63.72
44	15300	73.85	47	15300	86.08							51	15300	61.8	29	15300	114.19		47	11400	156.37	48	16100	6.44	91	16100	57.74	97	16100	56.12	20	11400	222.02	38	16100	51.73
44	15300	78.49	47	15300	100.84							51	15300	65.14	29	15300	122.23		47	11400	159	48	16100	11.51	91	16100	115.7	101	16100	94.13	21	11400	44.48	39	16100	24.96
44	15300	85.17	47	15300	109.75							51	15300	67.77	30	10800	103.07		48	16100	41.97	48	16100	15.75	91	16100	203.73	102	16100	43.11	22	11400	12.76	39	16100	34.14
44	15300	199.8	47	15300	116.19							51	15300	71.1	30	10800	107.04		49	11400	29.83	48	16100	20.74	91	16100	242.68	103	16100	27.71	22	11400	44.58	39	16100	47.25
44	15300	203.49	48	15300	86.54							51	15300	73.73	30	10800	145.46		49	11400	43.09	48	16100	34.03	103	11400	143.65	106	16100	56.7	22	11400	69.45	39	16100	55.02
44	15300	220.77	48	15300	105.14							51	15300	76.86	30	10800	160.76		50	11400	226.49	48	16100	51.67	104	11400	74.67	106	16100	100.61	23	11400	9.78	39	16100	206.89
44	15300	224.33	48	15300	109.43							51	15300	80.23	30	10800	174.73		53	11400	223.41	52	16100	47.43	108	11400	79.16	107	16100	35.91	23	11400	67.2	40	16100	170.6
44	15300	228.42	48	15300	114.83							51	15300	83.9	42	10800	64.97		54	11400	85.07	52	16100	51.43	108	11400	156.23	107	16100	58.03	23	11400	175.63	40	16100	196.55
44	15300	231.49	48	15300	118.24							51	15300	89.35	42	10800	75.86		54	11400	101.45	52	16100	59.31	109	11400	206.74	107	16100	98.98	23	11400	188.66	42	16100	68.49
44	15300	243.01	48	15300	153.65							51	15300	94.23	42	10800	91.21		54	11400	131.29	52	16100	62.55	112	11400	129.71	107	16100	135.46	24	11400	66.16	42	16100	73.99
48	15300	48.95	48	15300	219.84							51	15300	98.83	42	10800	107.25		58	11400	198.42	52	16100	70	113	16100	37.99	108	16100	24.15	24	11400	75.54	43	16100	53.45
59	15300	25.65	49	15300	82.88							51	15300	104.92	42	10800	233.81		58	11400	204.55	52	16100	79.96	113	16100	40.62	108	16100	43.53	24	11400	247.04	43	16100	58.03
59	15300	28.92	53	15300	208							60	15300	60.3	42	10800	238.37		58	11400	230.99	55	16100	192.58	113	16100	97.76	112	16100	115.66	25	11400	1.3	44	16100	81.45
59	15300	32.47	53	15300	218.11							60	15300	65.38	42	10800	242.31		59	11400	202.45	55	16100	195.69	113	16100	103.83	114	16100	15	25	11400	15.58	44	16100	94.28
59	15300	39.24	53	15300	230.84							60	15300	68.99	42	10800	247.55		63	11400	229.32	55	16100	199.11	113	16100	245.85	115	16100	182.02	25	11400	156.44	45	16100	92.02
59	15300	41.98	53	15300	244.54							60	15300	72.24	43	15300	0.94		64	11400	85.82	55	16100	208.38	114	11400	11.63	116	16100	191.95	25	11400	179.03	46	16100	56.38
59	15300	44.97	54	15300	9.31							60	15300	78.25	43	15300	5.66		64	11400	93.64	59	11400	147.56	114	11400	15.02	117	16100	57.11	26	11400	61.75	46	16100	59.87
59	15300	48.99	54	15300	39.09							60	15300	81	43	15300	8.64		64	11400	101.34	59	11400	150.84	114	11400	218.23	117	16100	69.4	26	11400	80.72	47	11400	17.19
59	15300	52.99	54	15300	99.97							60	15300	87.38	43	15300	14.7		64	11400	104.77	59	11400	154.44	119	16100	62.64	117	16100	76.83	26	11400	103.04	47	11400	27.56
59	15300	56.07	54	15300	124.94							60	15300	92.75	43	15300	26		64	11400	110.08	59	11400	161.04	119	16100	84.27	117	16100	137.05	26	11400	217.68	47	11400	215.62
59	15300	59.29	54	15300	132.38							60	15300	96.08	43	15300	28.63		69	11400	33.75	59	11400	192.42	119	16100	99.55	118	11400	31.81	27	16100	31.23	47	11400	219.85
59	15300	62.74	54	15300	138.62							60	15300	102.61	43	15300	31.26		69	11400	38.24	62	16100	81.97	120	11400	104.63	118	11400	41.45	27	16100	199.51	47	11400	223.69
59	15300	65.67	54	15300	141.5							60	15300	120.51	53	15300	238.12		69	11400	55.59	62	16100	88.01	122	11400	94.19	118	11400	246.15	27	16100	217.01	48	16100	42.05
59	15300	68.3	54	15300	170.06							60	15300	128.42	54	15300	34.96		69	11400	109.05	62	16100	104.46	122	11400	188.89	119	16100	21.36	28	11400	110.1	50	16100	47.06
59	15300	71.71	54	15300	174.39							64	15300	77.75	54	15300	38.64		69	11400	138.12	62	16100	107.09	123	11400	44.74	123	16100	29.61	28	11400	123.1	50	16100	54.6
59	15300	76.12	55	15300	21.26							64	15300	93.23	54	15300	41.42		69	11400	144.18	64	11400	182.7	124	11400	32.83	123	16100	99.73	29	11400	26.15	50	16100	70.28
59	15300	80.53	70	15300	49.67							73	10800	178.06	54	15300	44.73		69	11400	151.22	64	11400	190.27	124	11400	210.8	124	16100	43.17	29	11400	40.45	52	11400	64.05
59	15300	84.82	70	15300	54.12							80	15300	31.86	54	15300	51.36		71	16100	41.56	64	11400	193.54	125	11400	195.62	124	16100	46.96	29	11400	192.1	54	16100	108.81
59	15300	88.67	70	15300	60.29							80	15300	36.11	54	15300	54.94		75	11400	74.19	64	11400	196.44	127	16100	60.01	124	16100	53.91	29	11400	213.74	55	16100	24.29
59	15300	93.54	70	15300	69.84							80	15300	41.54	54	15300	59.63		75	11400	85.53	64	11400	206.11	128	11400	55.87	125	16100	115.66	30	11400	83.52	56	16100	48.93
59	15300	101.34	70	15300	83.07							80	15300	50.83	54	15300	66.4		75	11400	100.71	64	11400	209.62	129	11400	91.42	125	16100	123.74	30	11400	101.76	59	16100	246.18
59	15300	103.97	70	15300	91.09							80	15300	53.46	54	15300	69.27		78	11400	108.24	67	16100	179.54	131	11400	166.43	125	16100	129.72	30	11400	249.47	60	16100	171.32
60	10800	0.15	70	15300	94.15							80	15300	56.82	54	15300	72.26		78	11400	125.95	68	11400	94.21	133	16100	43.76	126	16100	104.92	31	11400	113.5	60	16100	232.97
60	10800	5.84	70	15300	97.06							80	15300	60.06	54	15300	76.64		82	11400	94.18	68	11400	105.04	133	16100	52.32	126	16100	169.75	31	11400	132.09	60	16100	237.23
60	10800	17.74	70	15300	101.1							80	15300	71.49	55	15300	137.88		82	11400	177.75	68	11400	110.73	133	16100	73.59	131	16100	117.69	32	11400	33.77	60	16100	244.14
60	10800	21.48	70	15300	105.72							80	15300	83.89	55	15300	144.79		82	11400	181.74	68	11400	113.45	134	11400	208.99	131	16100	122.65	32	11400	42.54	64	16100	2.03
60	10800	29.36	70	15300	108.35							80	15300	87.39	55	15300	151.86		82	11400	221.97	68	11400	119.5	136	11400	17.69	131	16100	129.54	32	11400	216.83	65	16100	64.01
60	10800	42.61	70	15300	110.98							90	10800	46.23	55	15300	165.33		82	11400	237.31	68	11400	130.72	136	11400	126.66	134	16100	209.17	32	11400	221.82	66	11400	37.27
61	10800	20.38	71	15300	156.69							90	10800	52.2	55	15300	168.34		82	11400	239.94	68	11400	137.62	140	16100	40.8	135	16100	76.09	32	11400	236.96	67	16100	61.55
61	10800	100.6	71	15300	170.8							90	10800	54.83	55	15300	173.98		83	11400	17.04	68	11400	144.78	140	16100	49.01	136	16100	72.09	33	11400	27.94	68	16100	120.46
61	10800	104.09	71	15300	185.05							90	10800	58.61	82	15300	166.05		83	11400	24.71	68	11400	177	148	11400	5.77	136	16100	126.3	33	11400	189.27	69	16100	131.62
61	10800	157.24	71	15300	191.64							90	10800	65.8	82	15300	184.79		86	11400	64.83	72	16100	147.32	149	11400	205.54	137	16100	183.71	34	11400	78.29	71	16100	107.65
61	10800	167.4	84	15300	231.38							90	10800	69.01	82	15300	195.17		87	11400	90.26	73	16100	238.36	150	11400	54.04	138	16100	199.11	34	11400	215.77	72	16100	174.13
62	10800	74.38	85	15300	0.38							90	10800	71.85	82	15300	199.08		87	11400	99.45	73	16100	246.76	155	11400	147.99	138	16100	242.88	34	11400	224.97	73	16100	203.18
71	15300	22.87	85	15300	4.16							90	10800	78.06	82	15300	234.3		87	11400	105.52	74	16100	3.37	156	11400	213.32	139	11400	61.05	35	11400	109.16	74	16100	155.97
71	15300	26	85	15300	17.45							90	10800	83.56	95	15300	47.92		87	11400	109.21	74	16100	8.04	158	11400	37.48	142	16100	163.99	35	11400	230.79	74	16100	183.05
71	15300	44.23	86	15300	98.08							90	10800	86.22	95	15300	52.56		89	16100	86.13	74	16100	10.67	162	16100	33.43	144	11400	37.33	36	16100	0.05	76	16100	43.26
71	15300	52.7	86	15300	131.89							90	10800	88.86	95	15300	56.06		89	16100	137.74	74	16100	13.93	162	16100	40.09	144	11400	40	36	16100	22.21	77	16100	46.88
71	15300	56.17	86	15300	137							90	10800	93.8	95	15300	60.21		90	11400	189.7	74	16100	56.43	162	16100	68.05	144	11400	43.05	36	16100	70.2	78	16100	178
71	15300	61.15	86	15300	144.75							90	10800	97.02	95	15300	63.57		90	11400	193.06	74	16100	127.36	162	16100	146.42	144	11400	56.06	36	16100	110.91	79	16100	85.81
71	15300	63.9	86	15300	147.66							90	10800	101.29	95	15300	68.1		90	11400	195.69	78	16100	58.58	162	16100	246.12	144	11400	100.35	36	16100	213.06	81	16100	2.1
71	15300	67.97	86	15300	151.56							90	10800	104.64	95	15300	72.96		93	11400	195.81	78	16100	62.69	164	11400	35.76	144	11400	111.95	37	11400	77.84	81	16100	7.53
71	15300	72.84	86	15300	154.8							90	10800	109.41	95	15300	78.23		95	16100	25	78	16100	72.3	166	11400	193.03	145	16100	167.32	37	11400	98.99	81	16100	11.36
71	15300	81.69	86	15300	158.72							90	10800	112.11	95	15300	80.86		95	16100	47.39	78	16100	99.51	168	11400	207.73	147	16100	66.31	38	11400	12.68	81	16100	15.32
71	15300	89.83	86	15300	165.19							90	10800	115.64	95	15300	83.49		95	16100	115.86	78	16100	106.81	169	11400	23.67	148	16100	34.16	38	11400	23.86	81	16100	117.93
71	15300	97.76	86	15300	169.05							90	10800	118.67	95	15300	86.34		99	11400	8.91	79	16100	98.54	169	11400	114.72	150	16100	46.86	38	11400	187.64	83	16100	34.02
84	10800	50.78	86	15300	172.33							90	10800	121.3	95	15300	88.97		103	11400	209.08	79	16100	103.5	172	11400	183.76	151	16100	66.9	38	11400	219.18	83	16100	194.06
84	10800	57.21	86	15300	180.52							90	10800	130.6	95	15300	92.03		103	11400	235.94	79	16100	124.31	173	11400	49.15	151	16100	109.17	38	11400	241.65	84	16100	87.51
84	10800	62.82	86	15300	188.27							90	10800	133.27	95	15300	97.54		106	11400	198.65	79	16100	147.18	175	16100	20.79	152	11400	13.09	39	11400	80.78	85	16100	108.97
84	10800	65.75	94	10800	44.75							90	10800	146.75	95	15300	104.49		107	16100	40.98	79	16100	150.23	175	16100	42.36	152	11400	248.87	39	11400	96.03	86	16100	236.43
84	10800	75.18	94	10800	52.33							90	10800	156.51	95	15300	108.47		109	11400	119.35	83	16100	121.64	175	16100	70.62	153	16100	2.05	39	11400	247.02	89	16100	121.53
84	10800	77.92	94	10800	66.02							98	10800	7.82	95	15300	119.26		112	16100	189	83	16100	241.34	175	16100	108.77	154	16100	66.59	40	11400	21.36	91	16100	59.81
84	10800	81.13	94	10800	69.87							98	10800	18.03	95	15300	123.48		112	16100	209.99	83	16100	243.98	175	16100	210.34	154	16100	85.43	40	11400	58.6	92	16100	81.22
84	10800	84.64	94	10800	77.9							98	10800	21.84	96	15300	100.84		115	11400	85.47	83	16100	246.74	181	11400	175.12	155	16100	14.44	40	11400	212.9	92	16100	93.17
84	10800	95.36	94	10800	88.71							98	10800	24.48	96	15300	127.45		115	11400	132.99	84	16100	6.54	182	11400	154.2	156	11400	27.06	41	11400	172.1	93	16100	136.12
84	10800	99.18	94	10800	96.18							98	10800	27.44	96	15300	137.92		120	11400	88.55	87	16100	228.08	186	11400	213.97	156	11400	30.26	42	16100	7.77	93	16100	176.78
84	10800	109.51	95	15300	9.45							98	10800	30.75	96	15300	146.91		120	11400	92.91	89	16100	124.83	191	11400	24.32	156	11400	41.45	42	16100	37.13	94	16100	241.37
85	15300	20.84	102	10800	45.93							98	10800	33.5	96	15300	159.6		120	11400	109.43	89	16100	131.42	191	11400	88.08	156	11400	46.98	42	16100	53.85	95	16100	10.4
85	15300	25	102	10800	57.7							98	10800	40.41	105	15300	97.95		120	11400	119.13	89	16100	137.7	196	11400	165.56	156	11400	57.15	42	16100	151.9	96	11400	71.2
85	15300	37.04	102	10800	61.48							98	10800	43.6	110	15300	225.73		120	11400	133.4	89	16100	201.48	197	11400	132.67	157	16100	154.43	42	16100	169.44	97	16100	174.37
85	15300	40.97	102	10800	64.39							98	10800	49.63	112	10800	73.14		120	11400	139.66	89	16100	206.9	198	16100	84.91	158	16100	221.58	42	16100	211.06	98	16100	46.5
85	15300	44.93	102	10800	67.87							99	10800	112.6	112	10800	76.37		120	11400	145.92	89	16100	215.07	198	16100	88.58	160	16100	52.57	43	11400	202.69	98	16100	73.89
85	15300	49.91	102	10800	72.47							99	10800	115.71	137	10800	17.83		120	11400	148.7	89	16100	220.75	198	16100	100.98	161	16100	28.55	43	11400	217.76	99	16100	7.39
85	15300	53.45	102	10800	77.22							99	10800	131.41	137	10800	55.21		123	11400	180.62	90	16100	19.58	198	16100	120.7	161	16100	50.4	44	11400	164.35	99	16100	29.42
85	15300	59.15	102	10800	83.33							99	10800	136.21	137	10800	79.14		123	11400	188.92	95	16100	140.05	199	11400	182.1	161	16100	53.6	44	11400	186.28	100	16100	91.6
85	15300	67.78	102	10800	90.53							99	10800	139.71	142	15300	200.15		123	11400	193.22	95	16100	158.56	200	11400	11.02	166	11400	26.17	45	11400	67.59	101	16100	70.18
85	15300	72	102	10800	99.1							99	10800	150.18	142	15300	205.79		123	11400	212.91	95	16100	168.75	200	11400	245.61	166	11400	30.91	45	11400	102.1	101	16100	107.61
85	15300	76.92	102	10800	104.94							99	10800	200	142	15300	216.47		124	11400	181.48	95	16100	177.47	202	16100	129.32	166	11400	41.85	45	11400	230.06	103	16100	12.14
85	15300	79.91	102	10800	108.12							115	15300	50.77	142	15300	221.2		124	11400	184.58	95	16100	183.55	202	16100	174.24	167	16100	104.07	46	11400	47.62	103	16100	41.43
85	15300	88.82	102	10800	111.44							115	15300	59.25	142	15300	224.92		127	11400	203.15	95	16100	194.79	203	11400	104.64	167	16100	117	46	11400	121.66	103	16100	56.24
86	10800	218.47	102	10800	117.39							115	15300	62.11	142	15300	234.07		127	11400	210	95	16100	218.02	204	11400	246.13	171	16100	219.68	46	11400	226.78	105	16100	49.62
87	10800	63.4	102	10800	130.58							115	15300	65.13	142	15300	239.78		127	11400	214.64	98	16100	184.87	206	11400	198.48	171	16100	235.97	47	11400	112.2	106	11400	28.62
95	15300	33.49	102	10800	226.26							115	15300	68.39	142	15300	243.66		127	11400	218.41	98	16100	199.92	210	11400	137.7	172	16100	12.17	47	11400	145.91	108	16100	31.75
95	15300	41.68	108	15300	39.31							115	15300	71.6	149	10800	49.2		127	11400	244.52	98	16100	204.27	211	11400	213.29	172	16100	85.05	47	11400	165.59	108	16100	105.42
95	15300	95.69	108	15300	46.86							115	15300	74.85	149	10800	82.86		128	11400	49.7	98	16100	209.86	214	11400	249.98	172	16100	97.48	48	11400	147.95	110	16100	68.31
95	15300	110.09	108	15300	49.71							115	15300	78.95	159	10800	51.36		128	11400	52.76	98	16100	213.48	216	16100	34.55	173	16100	143.21	48	11400	166.32	110	16100	106.81
103	15300	35.33	108	15300	60.24							115	15300	81.76	159	10800	59.91		128	11400	244.04	98	16100	221.55	216	16100	43.1	173	16100	178.59	49	11400	126.92	110	16100	180.83
103	15300	39.22	108	15300	65.84							115	15300	84.44	159	10800	63.45		129	16100	16.46	99	16100	17.27	216	16100	72.14	174	16100	196.44	49	11400	137.25	112	16100	68.52
103	15300	47.1	108	15300	69.51							115	15300	88.44	159	10800	66.7		129	16100	25.07	103	16100	146.1	217	11400	12.78	175	11400	207.26	49	11400	225.61	112	16100	84.95
103	15300	50.84	108	15300	72.37							115	15300	93.05	159	10800	69.95		129	16100	28.02	103	16100	156.82	217	11400	105.18	176	16100	101.92	50	11400	59.45	112	16100	112.08
103	15300	59.57	108	15300	75.28							115	15300	103.89	159	10800	74.37		131	11400	120.88	103	16100	159.91	218	11400	5.79	180	16100	66.13	50	11400	98.55	112	16100	128.74
103	15300	63.84	108	15300	80.81							115	15300	110.3	159	10800	77.09		131	11400	132.53	104	16100	145.08	221	11400	209.09	180	16100	71.92	50	11400	156.91	112	16100	199.64
103	15300	67.33	108	15300	89.33							117	10800	46.31	159	10800	80.91		132	11400	210.79	104	16100	148.37	221	11400	215.64	180	16100	77.77	50	11400	173.61	113	16100	215.92
103	15300	70.14	108	15300	95.83							117	10800	60.67	159	10800	84.48		132	11400	213.8	108	16100	219.11	222	11400	203.43	180	16100	83.85	51	11400	72.68	116	16100	13.97
103	15300	73.96	108	15300	106.05							117	10800	63.96	159	10800	90.04		132	11400	223.2	108	16100	227.89	224	16100	51.07	181	16100	199.25	51	11400	166.17	116	16100	64.04
103	15300	78.07	108	15300	109.13							117	10800	72.77	159	10800	92.75		132	11400	244.4	108	16100	235.52	224	16100	71.6	181	16100	207.79	51	11400	185.28	116	16100	107.03
103	15300	80.91	108	15300	112.83							117	10800	75.69	159	10800	98.27		133	11400	11.23	110	16100	17.47	224	16100	93.72	181	16100	210.45	52	11400	118.98	116	16100	122.5
103	15300	84.95	130	10800	30.92							117	10800	80.46	159	10800	114.18		137	11400	98.52	110	16100	23.02	225	11400	164.86	183	16100	64.31	53	11400	9.24	116	16100	140.81
103	15300	89.86	130	10800	38.57							117	10800	84.8	159	10800	120.54		137	11400	104.49	110	16100	33.06	235	11400	41.15	187	16100	14.88	53	11400	203.39	116	16100	143.88
103	15300	93.75	130	10800	43.72							117	10800	91.64	161	15300	81.32		137	11400	119.36	110	16100	62.34	237	11400	213.43	187	16100	21.78	53	11400	214.73	118	16100	193.21
103	15300	97.2	130	10800	47.84							133	15300	23.07	173	15300	167.68		137	11400	130.47	110	16100	70.51	242	11400	35.06	187	16100	204.61	54	11400	112.8	118	16100	225.18
103	15300	101.97	130	10800	53.23							133	15300	26.41	173	15300	186.17		138	16100	21.05	110	16100	125.64	243	11400	173.43	188	11400	44.9	54	11400	156.89	118	16100	228.55
103	15300	104.77	130	10800	56.71							133	15300	36.83	173	15300	189.57		138	16100	23.68	113	16100	126.23	245	11400	186.18	191	16100	48.88	54	11400	172.02	119	16100	13.11
103	15300	115.15	130	10800	60.45							133	15300	42.17	173	15300	192.2		138	16100	29.74	113	16100	128.86	248	11400	155.97	191	16100	88.63	55	11400	66.45	119	16100	17.06
103	15300	136.82	130	10800	67.13							133	15300	45.06	173	15300	196.39		138	16100	50.49	113	16100	137.94	249	11400	216.81	191	16100	133.47	55	11400	83.28	119	16100	56.89
117	15300	21.86	130	10800	70.08							133	15300	47.69	173	15300	199.11		138	16100	55.1	113	16100	166.39	250	16100	34.03	195	16100	46.65	55	11400	154.43	120	16100	66.79
117	15300	26.81	130	10800	73.43							133	15300	50.66	173	15300	207.44		138	16100	65.54	115	16100	79.57	250	16100	123.48	195	16100	50.46	55	11400	179.09	120	16100	98.26
117	15300	33.69	130	10800	79.49							133	15300	53.89	174	15300	180.35		138	16100	68.71	117	11400	245.24	250	16100	195.94	196	11400	56.57	55	11400	199.02	121	16100	241.35
117	15300	38.4	130	10800	83.4							133	15300	57.01	174	15300	193.25		138	16100	71.34	117	11400	248.52	251	11400	12.65	196	11400	174.96	56	16100	173.72	121	16100	247.97
117	15300	41.77	130	10800	87.19							133	15300	60.9	174	15300	198.79		138	16100	91.36	119	16100	79.29	251	11400	173.18	198	16100	114.6	57	11400	111.97	122	16100	0.72
117	15300	44.9	130	10800	90.45							133	15300	65.64	174	15300	201.62		138	16100	112.5	119	16100	96.1	255	16100	33.6	198	16100	130.78	57	11400	144.48	122	16100	9.02
117	15300	47.56	130	10800	107.7							133	15300	68.33	174	15300	206.02		138	16100	115.17	119	16100	103.99	255	16100	66.82	198	16100	158.08	58	11400	117.61	122	16100	29.23
117	15300	53.14	130	10800	239.81							133	15300	71.53	174	15300	220.03		138	16100	122.38	124	16100	93.93	255	16100	102.87	201	16100	95.67	59	11400	91.55	122	16100	135.92
117	15300	57.1	130	10800	242.91							133	15300	74.9	174	15300	223.63		142	16100	50.94	127	11400	18.54	259	11400	236.63	202	16100	17.26	59	11400	168.39	123	16100	208.62
117	15300	60.19	130	10800	248.85							133	15300	81.89	174	15300	226.28		142	16100	153.93	127	11400	28.31	260	16100	34.35	202	16100	64.57	59	11400	247.67	124	11400	1.89
117	15300	64.24	131	15300	4.82							133	15300	85.41	174	15300	231.31		142	16100	159.08	127	11400	206.26	260	16100	79.51	203	11400	29.04	60	11400	161.74	124	11400	7.27
117	15300	68.12	131	15300	9.07							133	15300	94.63	174	15300	235.53		142	16100	164.43	127	11400	242.07	263	11400	10.5	203	11400	36.75	60	11400	177.8	124	11400	13.73
117	15300	73.62	131	15300	12.39							133	15300	228.75	182	10800	62.09		142	16100	172.39	128	16100	8.49	266	11400	80.67	203	11400	41.93	60	11400	218.65	125	16100	30.25
117	15300	78.42	131	15300	18.28							134	10800	133.32	182	10800	68.2		143	11400	28.53	128	16100	33.09	266	11400	184.56	206	16100	123.53	61	16100	185.79	125	16100	34.2
117	15300	81.05	131	15300	23.97							134	10800	154.65	182	10800	71.15		143	11400	33.44	128	16100	45.36	268	11400	221.08	206	16100	127.95	61	16100	204.6	125	16100	41.47
118	10800	5.27	131	15300	38.94							134	10800	162.74	182	10800	74.27		143	11400	37.68	130	16100	53.39	271	16100	42.49	208	16100	73.72	62	11400	161.67	125	16100	121.16
118	10800	16.38	131	15300	42.85							141	10800	216.46	182	10800	77.9		143	11400	42.4	130	16100	60.62	271	16100	48.72	208	16100	86.81	63	11400	51.76	125	16100	137.28
118	10800	25.82	131	15300	45.56							149	10800	107.38	182	10800	96.53		143	11400	49.27	130	16100	65.17	271	16100	52.66	212	16100	79.13	63	11400	92.86	126	16100	3.96
118	10800	41.03	131	15300	49.74							149	10800	118.04	188	15300	168.32		143	11400	68.74	130	16100	76.79	272	11400	2.45	216	16100	182.35	63	11400	232.55	126	16100	29.86
118	10800	105.3	131	15300	57.59							149	10800	123.32	206	15300	192.09		143	11400	71.41	130	16100	81.9	272	11400	35.43	217	16100	90.62	64	11400	143.03	126	16100	37.4
121	10800	20.72	131	15300	78.34							149	10800	146.27	206	15300	197.49		143	11400	81.46	130	16100	105.79	272	11400	85.32	217	16100	114.11	64	11400	163.24	126	16100	43.84
121	10800	23.89	131	15300	99.76							149	10800	159.15	206	15300	200.52		143	11400	91.81	130	16100	167.4	279	11400	43.19	220	16100	38.7	65	11400	62.2	127	16100	57.19
121	10800	30.53	132	15300	35.34							150	10800	22.38	206	15300	204.12		143	11400	110.73	134	16100	25.26	281	16100	74.21	220	16100	132.8	65	11400	73.57	130	16100	168.34
121	10800	37.78	132	15300	77.93							158	10800	128.17	206	15300	207.84		143	11400	126.83	134	16100	31.85	281	16100	113.6	221	16100	59.14	65	11400	164.42	130	16100	172.36
121	10800	42.07	132	15300	93.48							158	10800	130.84	206	15300	210.93		148	11400	128.39	135	16100	42.5	282	11400	24.14	221	16100	93.54	66	16100	104.46	132	16100	31.3
121	10800	46.64	140	15300	35.46							158	10800	139.09	206	15300	214.94		148	11400	175.19	135	16100	61.38	287	11400	110.56	223	16100	31.72	66	16100	115.25	132	16100	86.35
121	10800	50.35	140	15300	44.38							158	10800	142.04	206	15300	218.66		148	11400	177.82	135	16100	64.01	288	16100	42.41	223	16100	49.44	67	11400	86.74	132	16100	98.59
121	10800	56.98	140	15300	51.9							158	10800	144.77	206	15300	221.61		148	11400	180.66	135	16100	89.41	288	16100	57.04	223	16100	56.9	67	11400	111.63	132	16100	107.09
121	10800	61.18	140	15300	54.69							158	10800	149.88	206	15300	225.19		148	11400	207.04	135	16100	95.05	290	11400	114.68	226	16100	87.47	68	11400	116.05	132	16100	112.82
121	10800	70.58	140	15300	57.33							158	10800	152.98	206	15300	228.36		148	11400	235.28	139	16100	22.29	290	11400	178.12	226	16100	116.76	68	11400	128.63	132	16100	195.16
121	10800	226.56	140	15300	60.91							158	10800	157.52	206	15300	232.82		148	11400	246.97	139	16100	43.77	291	11400	190.27	227	16100	192.95	69	11400	161.34	132	16100	201.87
122	10800	25.76	140	15300	63.86							158	10800	161.49	206	15300	235.45		149	11400	18.55	139	16100	56.66	292	11400	31.82	227	16100	228	70	11400	134.73	132	16100	204.94
122	10800	90.65	140	15300	67.28							158	10800	164.71	206	15300	239.05		155	11400	93.24	142	16100	93.53	292	11400	171.76	229	16100	157.85	70	11400	148.47	132	16100	214.77
133	10800	89.71	140	15300	71.34							159	10800	218.11	206	15300	243.94		155	11400	96.75	144	16100	166.63	293	16100	61.79	229	16100	230.97	71	16100	34.34	134	11400	33.35
133	10800	97.66	140	15300	74.16							159	10800	220.74	206	15300	248.3		155	11400	99.44	144	16100	175.09	293	16100	71.65	232	16100	109.16	71	16100	161.57	134	11400	55.34
133	10800	106.35	140	15300	77.08							164	10800	206.69	207	15300	3.96		155	11400	102.68	144	16100	178.09	293	16100	109.14	232	16100	149.32	71	16100	178.32	134	11400	204.79
133	10800	119.18	140	15300	83.53							164	10800	210.34	208	15300	110.88		155	11400	108.32	149	16100	97.41	294	11400	167.96	233	16100	147.51	72	11400	197.38	134	11400	229.01
133	10800	127.89	140	15300	89.71							164	10800	214.58	208	15300	127.99		155	11400	119.76	149	16100	106.32	296	11400	14.16	233	16100	168.65	73	11400	152.97	140	16100	59.45
133	10800	130.8	140	15300	94.82							164	10800	217.31	221	10800	41.21		155	11400	153.89	149	16100	111.81	296	11400	164.9	235	16100	9.46	73	11400	160.6	140	16100	238.81
133	10800	134.19	140	15300	98.57							164	10800	220.63	221	10800	54.21		156	11400	48.02	149	16100	124.52	297	16100	29.77	238	16100	132.77	73	11400	225.44	140	16100	249.18
133	10800	137.07	140	15300	102.06							164	10800	223.26	221	10800	60.28		156	11400	58.32	150	16100	36.19	297	16100	49.07	238	16100	137.9	74	11400	104.31	141	16100	17.98
133	10800	143.64	140	15300	105.36							164	10800	229.12	221	10800	66.97		156	11400	188.74	150	16100	38.83	297	16100	67.23	239	16100	244.8	75	11400	142.52	141	16100	21.9
133	10800	156.51	140	15300	108.95							164	10800	231.78	221	10800	73.29		156	11400	209.42	150	16100	61.2	297	16100	97.75	240	16100	34.31	76	11400	12.43	141	16100	34.16
133	10800	164.41	140	15300	121.46							164	10800	234.54	221	10800	77.52		156	11400	220.26	151	16100	158.64	299	11400	227.08	240	16100	55.72	76	11400	135.46	141	16100	46.15
134	15300	18.79	140	15300	138.12							164	10800	242.08	221	10800	97.1		160	11400	19.48	154	16100	189.13	300	11400	172.75	243	16100	117.93	77	11400	23.11	142	16100	243.2
134	15300	21.47	141	10800	17.87							177	10800	66.58	231	15300	30.2		160	11400	37.69	155	16100	127.56	302	11400	67.3	246	11400	49.75	77	11400	45.24	142	16100	247.17
134	15300	24.1	141	10800	22.93							177	10800	70.79	232	15300	147.45		160	11400	45.4	155	16100	136.97	303	11400	144.93	246	11400	146.09	78	11400	225.57	143	16100	3.33
134	15300	41.51	141	10800	207.16							177	10800	83.42	241	10800	22.63		160	11400	60.25	155	16100	139.7	304	11400	22.17	246	11400	149.99	79	11400	212.35	143	16100	8.31
134	15300	130.4	142	15300	74.29							177	10800	88.79	241	10800	53.11		161	11400	112.05	155	16100	146.09	304	11400	28.43	246	11400	163.21	80	11400	187.65	143	16100	51.3
135	10800	169.33	142	15300	80.77							177	10800	91.98	241	10800	55.78		161	11400	123.73	155	16100	154.84	304	11400	34.59	249	16100	186.23	81	11400	152.67	143	16100	134.42
145	15300	26.26	151	15300	114.4							181	10800	96.09	241	10800	59.9		161	11400	132.79	155	16100	158.19	304	11400	206.47	251	16100	25.99	81	11400	171.19	143	16100	147.13
145	15300	37.03	151	15300	130.11							181	10800	112.6	241	10800	65.93		165	11400	118.92	159	16100	42.55	304	11400	209.25	251	16100	46.76	82	11400	161.43	143	16100	160.04
145	15300	46.97	151	15300	133.73							181	10800	120.38	241	10800	76.59		165	11400	136.52	159	16100	56.97	305	11400	99.74	251	16100	49.65	82	11400	177.64	143	16100	163.72
145	15300	51.98	151	15300	137.99							181	10800	125.19	241	10800	80.97		165	11400	188.63	159	16100	64.9	305	11400	106.97	251	16100	95.72	83	11400	176.57	143	16100	167.53
145	15300	66.16	151	15300	141.38							181	10800	130.32	241	10800	84.42		167	11400	89.43	159	16100	74.32	306	11400	47.74	251	16100	137.25	83	11400	195.87	143	16100	221.35
145	15300	69.59	151	15300	144.24							181	10800	137.17	241	10800	87.05		168	11400	196.38	159	16100	79.03	306	11400	56.42	251	16100	166.95	84	11400	169.91	145	16100	24.84
145	15300	73.4	151	15300	147.15							191	10800	138.84	241	10800	92.18		168	11400	199.46	160	16100	29.87	307	11400	20.94	254	16100	175.98	84	11400	188.93	145	16100	31.35
145	15300	77.62	151	15300	152.59							211	10800	59.33	248	10800	29.64		168	11400	205.05	160	16100	64.25	307	11400	60.57	254	16100	178.61	84	11400	209.61	145	16100	39.42
145	15300	80.66	151	15300	164.24							211	10800	63.04	248	10800	40.13		171	16100	149.63	163	16100	190.08	307	11400	97.78	254	16100	187.92	85	11400	167.44	145	16100	81.1
146	10800	214.5	151	15300	176.35							211	10800	66.95	248	10800	51.93		171	16100	160.53	163	16100	198.48	308	11400	54.12	256	16100	55.44	86	11400	163.29	147	16100	158.16
146	10800	222.08	151	15300	186.69							211	10800	74.14	248	10800	56.56		171	16100	188.99	164	16100	133.31	310	11400	82.62	256	16100	63.5	87	11400	12.62	147	16100	162.05
146	10800	246.82	151	15300	199.96							211	10800	77.9	248	10800	60.78		172	11400	143.35	164	16100	168.65	310	11400	125.45	258	11400	194.86	87	11400	154.46	147	16100	188.15
147	10800	19.32	156	15300	176.86							211	10800	82.43	248	10800	64.46		172	11400	150.56	164	16100	173.93	311	11400	108.23	260	16100	163.91	87	11400	172.51	148	16100	41.95
162	15300	18.92	164	10800	53.14							211	10800	85.06	248	10800	70.47		172	11400	154.79	164	16100	184.17	315	16100	106.31	262	16100	130.48	89	16100	49.12	148	16100	51.72
162	15300	27.92	164	10800	66.66							211	10800	88.24	248	10800	76.26		176	11400	148.27	164	16100	187.61	321	11400	165.85	264	11400	3.86	89	16100	164.79	148	16100	55.01
162	15300	35.22	175	10800	42.85							211	10800	92.04	248	10800	79.32		176	11400	156.32	165	11400	1.12	324	11400	125.04	264	11400	10.22	90	11400	143.87	148	16100	204.92
162	15300	42.94	175	10800	54.07							211	10800	97.88	248	10800	82.4		176	11400	159.25	168	16100	55.98	327	16100	46.18	264	11400	87.2	92	11400	243.87	152	16100	30.38
162	15300	46.21	175	10800	59.53							211	10800	105.43	265	15300	149.58		176	11400	163.02	168	16100	122.42	330	11400	166.69	264	11400	92.62	93	16100	199.38	152	16100	34.72
162	15300	48.85	175	10800	65.81							211	10800	108.46	265	15300	153.86		179	11400	189.59	176	16100	73.57	332	11400	87.65	268	16100	104.57	94	11400	129.82	152	16100	40.2
162	15300	51.87	175	10800	69.44							211	10800	111.09	265	15300	197.3		179	11400	198.24	176	16100	76.47	333	16100	62.4	268	16100	118.66	95	11400	142.69	152	16100	94.12
162	15300	54.64	175	10800	72.3							212	10800	86.59	284	10800	51.27		179	11400	206.06	176	16100	96.78	334	11400	6.9	269	16100	144.18	96	11400	142.63	153	11400	79.72
162	15300	57.44	175	10800	76.96							212	10800	89.81	284	10800	59.86		179	11400	210.09	176	16100	101.63	338	11400	11.02	269	16100	215.85	98	11400	53.48	154	16100	56.35
162	15300	61.9	175	10800	81.7							212	10800	93.58	284	10800	62.74		179	11400	222	176	16100	107.75	342	11400	65.56	274	16100	35.37	99	11400	29.14	154	16100	95.12
162	15300	64.79	175	10800	84.72							212	10800	97.87	284	10800	65.42		180	16100	34.02	176	16100	114.47	346	11400	213.63	274	16100	77.72	99	11400	47.74	154	16100	98.17
162	15300	68	175	10800	87.39							212	10800	106.96	284	10800	69.11		184	11400	125.76	179	16100	184.02	347	11400	117.44	274	16100	155.92	100	11400	206.08	154	16100	108.65
162	15300	72.05	175	10800	91							212	10800	110.38	284	10800	79.93		184	11400	139.93	179	16100	187.21	350	11400	2.51	275	16100	33.56	101	11400	212.06	154	16100	164.4
162	15300	75.33	175	10800	93.79							212	10800	118.86	284	10800	82.6		184	11400	151.55	179	16100	191.11	353	16100	95.31	275	16100	87.45	103	11400	174.43	156	16100	104.71
162	15300	80.12	175	10800	97.06							212	10800	126.17	296	15300	122.45		184	11400	159.62	179	16100	194.16	356	11400	25.97	280	16100	29.05	104	11400	192.77	156	16100	164.94
162	15300	87.97	175	10800	104.73							213	10800	123.1	301	15300	199.52		188	11400	243.69	179	16100	197.22	359	11400	228.36	280	16100	32.98	105	11400	158.13	156	16100	173.28
162	15300	90.61	175	10800	107.36							223	15300	43.57	301	15300	203.83		189	11400	7.69	179	16100	203.36	362	11400	133.87	280	16100	123.86	106	11400	64.36	156	16100	180.12
162	15300	94.83	175	10800	112.32							223	15300	46.45	301	15300	215.36		189	11400	21.99	182	16100	101.86	364	11400	234.51	282	16100	29.87	106	11400	117.61	156	16100	210.8
162	15300	247.2	175	10800	123.66							223	15300	52.85	301	15300	219.6		190	11400	112.9	182	16100	106.44	366	11400	3.56	285	16100	39.17	107	11400	20.3	157	16100	195.96
163	10800	2.31	176	15300	8							223	15300	60.74	301	15300	226.34		192	11400	238.61	185	11400	21.78	371	11400	100.32	285	16100	45.51	108	11400	56.94	157	16100	208.31
163	10800	7.53	176	15300	101.79							223	15300	65.06	301	15300	236.14		192	11400	241.24	185	11400	30.07	376	11400	221.27	287	16100	54.3	109	11400	22.49	157	16100	214.94
163	10800	10.16	176	15300	108.88							223	15300	69.66	304	15300	110.3		192	11400	245.85	186	16100	64.63	382	11400	88.69	287	16100	66.67	109	11400	52.89	159	16100	38.83
163	10800	18.14	176	15300	186.04							223	15300	74.17	314	15300	57.75		192	11400	248.6	190	16100	58.05	384	11400	12.6	290	16100	66.99	109	11400	191.49	159	16100	69.74
163	10800	23.21	177	15300	15.83							223	15300	77.89	314	15300	70.3		193	11400	4.36	190	16100	76.76	384	11400	122.37	290	16100	70.41	110	16100	130.77	159	16100	80.24
163	10800	43.74	177	15300	196.77							223	15300	81.15	314	15300	74.2		193	11400	7.69	196	16100	206.36	385	11400	3.62	290	16100	74.39	111	11400	165.19	159	16100	123.92
163	10800	190.16	177	15300	201.55							223	15300	84.71	314	15300	77.41		195	11400	50.88	196	16100	222.13	387	11400	36.08	291	16100	203.55	113	11400	48.42	160	16100	57.04
163	10800	193.34	197	15300	40.69							223	15300	87.34	314	15300	80.04		195	11400	70.65	196	16100	225.56	387	11400	128.67	292	16100	30.34	114	11400	88.02	160	16100	68.7
175	15300	24.7	198	15300	94.58							223	15300	90.61	314	15300	85.07		195	11400	75.06	197	16100	95.48	390	11400	231.23	292	16100	40.07	115	11400	39.6	160	16100	103.38
175	15300	35.53	198	15300	106.41							223	15300	100.33	314	15300	88.11		195	11400	79.59	197	16100	112.25	393	11400	166.24	296	16100	61.79	117	11400	98.62	160	16100	123.41
175	15300	51.34	199	10800	24.03							223	15300	103.6	314	15300	92.72		195	11400	129.68	197	16100	116.63	395	11400	236.78	297	11400	29.96	118	11400	142.58	163	16100	249.71
175	15300	57.49	199	10800	211.03							223	15300	107	314	15300	95.35		195	11400	141.8	200	16100	187.67	399	11400	166.31	298	16100	39.06	120	11400	119.63	164	16100	160.63
175	15300	61.83	208	10800	35.45							223	15300	124.56	314	15300	98.32		197	11400	128.66	200	16100	225.78	400	11400	145.61	299	16100	77.97	121	11400	47.29	164	16100	184.72
175	15300	65.47	208	10800	44.85							234	15300	35.46	314	15300	112.03		197	11400	138.06	200	16100	240.88				299	16100	93.9	135	11400	192.03	164	16100	187.78
175	15300	70.29	208	10800	49.68							234	15300	62.73	314	15300	114.82		197	11400	161.14	200	16100	245.3				300	16100	170.56	145	11400	242.64	164	16100	194.35
175	15300	73.12	208	10800	64.56							234	15300	69.33	315	15300	151.68		197	11400	167.05	201	16100	13.85				301	16100	187.69	148	16100	65.63	164	16100	197.24
175	15300	78.2	208	10800	72.16							234	15300	74.68	316	15300	93.22		198	16100	50.97	204	16100	215.33				305	16100	67.65	152	11400	136.64	164	16100	207.48
175	15300	85.81	208	10800	75.92							234	15300	77.59	316	15300	98.92		199	11400	192.02	204	16100	227.59				305	16100	74.03	172	11400	47.46	166	16100	157.95
175	15300	90.98	208	10800	81.66							234	15300	82.69	326	10800	51.4		200	11400	67.58	205	16100	227.69				305	16100	111.24	175	11400	28.07	166	16100	163.64
175	15300	96.55	208	10800	85.96							234	15300	92.14	343	15300	137.9		200	11400	104.02	205	16100	242				306	16100	72.05	196	16100	31.68	166	16100	207.76
175	15300	99.26	208	10800	200.21							234	15300	99.15	343	15300	142.43		200	11400	127.61	205	16100	247.92				310	11400	49.35	196	16100	56.28	166	16100	212.42
175	15300	106.16	209	15300	0.84							234	15300	109.29	343	15300	152.41		200	11400	131.85	206	16100	1.15				310	11400	70.16	196	16100	60.25	167	16100	103.03
175	15300	114.92	209	15300	9.29							234	15300	113.47	343	15300	159.21		203	11400	169.8	206	16100	6.93				312	16100	245.38	197	11400	219.85	167	16100	131.23
179	15300	52.83	209	15300	13.3							234	15300	116.99	343	15300	164.78		203	11400	175.5	206	16100	16.75				312	16100	249.39	200	11400	28.99	169	16100	25.54
182	10800	110.61	209	15300	49.1							236	10800	245.38	343	15300	182.63		203	11400	194.17	206	16100	46.63				313	16100	92.14	200	11400	128.64	169	16100	29.5
182	10800	119.71	209	15300	51.86							253	15300	76.53	354	10800	197.95		203	11400	221.87	206	16100	49.99				314	16100	241.04	202	11400	54.42	169	16100	113.29
195	15300	24.91	209	15300	57.23							260	15300	25.63	354	10800	202.14		206	16100	152.35	209	16100	198.9				317	16100	63.83	206	16100	51	169	16100	116.36
195	15300	27.94	209	15300	118.26							260	15300	52.52	354	10800	206.14		206	16100	160.51	209	16100	231.55				318	16100	47.97	206	16100	67.05	169	16100	120.48
195	15300	32.6	209	15300	121.2							260	15300	58.49	354	10800	209.94		207	11400	147	210	16100	2.82				320	16100	12.56	207	11400	59.48	169	16100	123.11
195	15300	39.34	209	15300	198.45							260	15300	62.31	354	10800	226.03		211	11400	184.14	211	16100	244.34				320	16100	43.65	211	11400	85.17	169	16100	132.75
195	15300	43.6	210	15300	86.58							260	15300	66.88	354	10800	235.68		211	11400	211.05	216	16100	209.7				320	16100	117.07	213	11400	23.41	169	16100	205.08
195	15300	48.19	210	15300	89.65							260	15300	71.4	354	10800	240.16		211	11400	214.46	216	16100	219.27				322	16100	89.66	219	11400	56.87	169	16100	214.52
195	15300	51.23	210	15300	150.11							260	15300	74.03	354	10800	246.03		211	11400	246.73	216	16100	227.16				322	16100	133.22	221	11400	179.44	169	16100	220.81
195	15300	55.3	230	15300	104.87							260	15300	76.68	355	15300	16.12		212	11400	0.72	217	16100	27.88				325	11400	196.77	232	16100	29.37	169	16100	249.25
195	15300	58.27	230	15300	111.26							260	15300	79.31	355	15300	31.66		214	11400	210.54	217	16100	49.67				328	16100	109.93	239	16100	50.39	171	16100	81.34
195	15300	60.9	230	15300	124.81							260	15300	82.85	357	15300	71.03		216	11400	91.19	220	16100	92.72				328	16100	120.66	240	11400	27.52	171	16100	165.77
195	15300	66.77	231	15300	153.6							260	15300	91.29	357	15300	83.31		216	11400	99.43	220	16100	97.23				329	16100	93.14	240	11400	37.63	171	16100	172.16
195	15300	71.47	231	15300	156.7							260	15300	100.77	357	15300	88.04		216	11400	109.23	220	16100	101.76				330	16100	6.89	240	11400	41.35	171	16100	175.87
195	15300	75.15	231	15300	166.37							260	15300	108.25	357	15300	91.95		216	11400	112.86	220	16100	104.39				330	16100	89.16	240	11400	45.05	171	16100	201.41
195	15300	89.46	231	15300	180.04							260	15300	122.34	357	15300	97.15		216	11400	151.37	221	16100	216.84				330	16100	99.66	240	11400	49.98	172	16100	30.97
195	15300	92.09	231	15300	191.58							260	15300	211.87	357	15300	100.25		218	16100	25.69	221	16100	220.06				333	11400	31.96	240	11400	53.73	172	16100	35.36
195	15300	99.47	236	10800	195.39							272	10800	154.29	357	15300	105.88		218	16100	224.87	221	16100	227				334	16100	57.71	241	11400	23.34	176	16100	70.92
195	15300	170.66	242	15300	33.58							272	10800	157.68	357	15300	108.88		218	16100	234.67	221	16100	232.86				335	16100	74.91	248	11400	51.75	177	16100	183.5
195	15300	188.38	242	15300	38.46							272	10800	160.48	357	15300	120.92		218	16100	238.06	222	16100	1.21				337	16100	34.07	249	11400	61.36	177	16100	191.97
195	15300	191.82	242	15300	43.63							272	10800	165.76	369	10800	59.29		218	16100	245.38	222	16100	15.72				337	16100	58.35	250	11400	40.25	177	16100	196.9
195	15300	196.65	242	15300	46.55							272	10800	169.72	369	10800	62.43		219	11400	5.92	222	16100	18.35				342	16100	104.46	258	11400	51.8	177	16100	223.35
195	15300	200.66	242	15300	56.88							272	10800	174.8	369	10800	68.23		219	11400	9.74	224	16100	220.73				342	16100	114.27	259	11400	234.07	177	16100	238.31
195	15300	214.47	242	15300	60.2							272	10800	177.8	370	15300	54.11		221	11400	103.43	224	16100	223.78				346	16100	135.73	260	11400	58.81	178	16100	3.24
196	10800	227.17	242	15300	63.71							272	10800	183.58	370	15300	57.69		221	11400	143.72	224	16100	227.15				346	16100	223.22	261	16100	71.12	180	11400	46.67
196	10800	230.66	242	15300	76.38							274	10800	155.3	370	15300	71.82		221	11400	168.21	224	16100	230.24				349	16100	29.06	268	11400	26.81	180	11400	50.81
211	15300	36.08	242	15300	79.51							274	10800	167.26	370	15300	78.21		224	11400	35.73	224	16100	233.88				349	16100	71.88	268	11400	108.94	180	11400	59.7
211	15300	61.96	242	15300	82.79							275	10800	13.12	370	15300	84.29		226	16100	59.4	224	16100	249.45				353	11400	113.51	269	11400	37.73	180	11400	89.6
211	15300	73.94	242	15300	90.46							278	10800	236.24	370	15300	92.36		226	16100	70.17	228	16100	174.56				357	16100	232.82	271	11400	16.46	180	11400	114.29
211	15300	79.32	242	15300	94.14							278	10800	239.84	370	15300	95.42		228	11400	44.39	229	16100	18.77				357	16100	239.25	271	11400	51.29	180	11400	123.17
211	15300	85.27	242	15300	97.7							278	10800	243.66	370	15300	100.52		228	11400	78.97	229	16100	21.67				358	16100	82.46	272	11400	21.74	180	11400	136.32
211	15300	90.31	242	15300	102.62							280	10800	124.73	370	15300	104.28		230	16100	175.11	229	16100	27.44				360	11400	40.24	274	11400	35.03	180	11400	221.45
211	15300	100.59	242	15300	109.64							280	10800	151.42	370	15300	108.07		230	16100	177.79	229	16100	31.54				361	16100	32.53	276	11400	68.75	181	16100	39.37
219	15300	40.31	243	15300	23.86							294	15300	52.77	370	15300	110.7		230	16100	184.81	229	16100	48.4				364	16100	120.12	282	11400	37.22	182	16100	244.63
219	15300	48.55	243	15300	26.95							294	15300	57.83	370	15300	115.59		230	16100	188.44	229	16100	52.33				366	16100	47.51	284	11400	93.33	183	16100	118.69
219	15300	52.54	243	15300	101.92							294	15300	63.45	370	15300	118.41		230	16100	202.28	232	16100	129.27				366	16100	51.05	288	11400	83.05	183	16100	163.52
219	15300	56.81	243	15300	105.94							294	15300	69.39	370	15300	125.25		231	11400	94.42	232	16100	141.79				366	16100	57.99	290	16100	30.44	185	16100	14.54
219	15300	63.44	243	15300	178.02							294	15300	72.78	377	10800	41.1		231	11400	97.3	232	16100	147.52				367	11400	155.58	290	16100	33.9	185	16100	44.37
219	15300	67.26	243	15300	240.64							294	15300	75.81	377	10800	66.26		231	11400	111.77	232	16100	152.53				367	11400	231.78	290	16100	37.57	186	16100	80.17
219	15300	80.44	244	15300	81.47							294	15300	78.53	377	10800	70.25		231	11400	122.34	232	16100	193.44				369	16100	157.36	290	16100	186.68	186	16100	102.2
219	15300	96.84	244	15300	88.8							294	15300	82.34	377	10800	76.64		235	11400	120.86	236	11400	25.55				369	16100	160.9	291	11400	0.1	186	16100	106.09
221	10800	18.38	256	10800	49							294	15300	87.13	377	10800	97.95		235	11400	125.71	236	11400	62.75				369	16100	164.53	291	11400	12.72	188	16100	46.57
221	10800	25.14	256	10800	52.13							294	15300	92.21	387	15300	71.09		235	11400	129.26	240	16100	2.68				369	16100	202.43	292	11400	4.95	188	16100	82.33
221	10800	28.81	256	10800	60.28							294	15300	96.63	387	15300	84.82		235	11400	142.47	240	16100	85.16				374	16100	64.12	292	11400	25.75	189	16100	60.33
221	10800	31.53	256	10800	72.6							294	15300	103.01	387	15300	90.64		235	11400	150.79	240	16100	105.74				375	16100	107.29	292	11400	49.71	189	16100	67.23
221	10800	40.4	258	15300	38.99							294	15300	107.48	387	15300	96.08		235	11400	156.78	240	16100	114.19				375	16100	111.17	298	11400	64.06	189	16100	110.24
221	10800	56.18	273	15300	145.77							294	15300	110.11	387	15300	106.73		235	11400	162.84	240	16100	120.6				375	16100	126.47	299	11400	52.72	190	16100	55.99
234	10800	137.36	279	15300	151.73							294	15300	116.3	387	15300	109.37		238	11400	9.63	240	16100	131.33				376	16100	21.88	310	11400	70.11	190	16100	74.37
234	10800	140.17	279	15300	157.18							294	15300	121.62	387	15300	116.43		238	11400	14.71	244	16100	25.4				387	16100	102.93	312	11400	86.46	191	16100	44.6
234	10800	144.07	288	15300	229.14							294	15300	126.74	387	15300	122.65		238	11400	19.61	244	16100	39.46				388	16100	145.6	312	11400	90.37	191	16100	51.07
234	10800	149.66	288	15300	240.13							307	15300	39.13					238	11400	45.59	247	16100	179.69				396	16100	7.82	313	11400	52.52	191	16100	54.86
234	10800	152.83	288	15300	245.96							327	10800	12.31					238	11400	49.98	248	16100	24.99				398	16100	49.33	315	11400	0.58	192	16100	52.97
234	10800	156.4	289	15300	4.89							327	10800	28.84					238	11400	53.58	249	16100	42.96							317	11400	95.53	192	16100	56.87
234	10800	159.05	289	15300	10.64							327	10800	36.49					238	11400	60.31	251	16100	28.11							318	11400	249.22	193	16100	38.08
234	10800	162.37	289	15300	17.94							327	10800	41.82					238	11400	108.4	251	16100	43.4							323	11400	60.79	193	16100	42.14
234	10800	165	289	15300	23.29							327	10800	51.26					240	11400	90.62	254	16100	130.62							323	11400	123.21	194	16100	32.83
234	10800	167.74	289	15300	26.09							327	10800	59.55					240	11400	109.2	257	16100	69.44							326	11400	154.01	194	16100	36.89
234	10800	170.73	290	15300	4.7							327	10800	66.7					240	11400	205.31	257	16100	76.37							328	11400	47.6	195	16100	42.38
234	10800	174.09	290	15300	11.09							327	10800	73.02					240	11400	225.05	257	16100	90.93							328	11400	52.56	196	16100	48.42
234	10800	182.44	290	15300	18.29							327	10800	82.28					240	11400	229.25	262	16100	179.26							328	11400	61.69	197	16100	54.89
235	15300	27.5	290	15300	24.5							327	10800	99.23					243	11400	82.53	263	16100	0.16							328	11400	72.99	197	16100	59.44
236	10800	110.6	290	15300	29.59							329	10800	64.65					243	11400	88.78	266	16100	58.98							328	11400	87.43	198	11400	41.37
236	10800	113.23	290	15300	33.49							341	15300	59.96					243	11400	108.09	266	16100	64.82							328	11400	90.93	199	16100	3.44
236	10800	121.33	290	15300	38.64							353	15300	41.87					243	11400	113.91	266	16100	109.6							330	11400	164.96	199	16100	20.46
236	10800	129	290	15300	42.99							353	15300	48.59					243	11400	129.87	266	16100	160.9							331	11400	239.09	199	16100	35.85
237	10800	35.91	290	15300	47.57							353	15300	61.85					243	11400	132.57	266	16100	189.09							332	11400	22.99	199	16100	39.67
237	10800	58.29	290	15300	50.21							353	15300	69.81					243	11400	149.17	266	16100	205.53							332	11400	28.66	200	16100	48.17
237	10800	71.58	290	15300	55.45							359	15300	70.35					245	11400	230.23	268	16100	16.54							332	11400	113.22	200	16100	51.44
237	10800	75.96	290	15300	59.89							359	15300	82.88					245	11400	232.86	268	16100	26.92							332	11400	116.26	200	16100	85.18
241	10800	83.64	290	15300	66.66							364	10800	166.4					245	11400	244.1	268	16100	59.51							335	11400	49.59	201	16100	45.51
241	10800	96.04	291	15300	186.28							364	10800	172.02					245	11400	249.77	270	16100	156.38							336	11400	74.26	202	16100	31.8
241	10800	120.46	291	15300	244.51							364	10800	180.66					249	11400	155.51	272	16100	167.94							337	11400	35.83	203	11400	20.94
241	10800	142.78	292	15300	3.22							364	10800	183.56					249	11400	162.91	272	16100	196.01							339	11400	44.45	203	11400	31.6
241	10800	145.41	299	10800	185.81							364	10800	187					249	11400	172.99	272	16100	209.58							339	11400	72.91	203	11400	37.97
241	10800	155.21	309	15300	115.9							364	10800	189.63					249	11400	203.34	272	16100	218.7							339	11400	77.93	203	11400	55.34
241	10800	159.01	309	15300	133.9							364	10800	194.86					249	11400	217.12	273	16100	11.13							339	11400	92.88	203	11400	83.23
256	15300	26.59	309	15300	143.61							364	10800	200.24					249	11400	231.1	276	16100	37.23							339	11400	113.74	204	16100	3.55
256	15300	42.67	312	10800	18.74							364	10800	206.85					249	11400	234.34	276	16100	51.31							339	11400	154.56	204	16100	10.82
256	15300	52.67	324	15300	105.31							364	10800	217.61					250	11400	22.5	276	16100	59.47							339	11400	158.1	204	16100	33.07
267	15300	21.11	324	15300	111.97							364	10800	227.28					250	11400	26.68	276	16100	62.8							342	11400	133.3	205	16100	66.82
267	15300	60.01	324	15300	115.14							364	10800	247.22					250	11400	42.01	276	16100	110.54							343	11400	212.53	206	16100	83.8
267	15300	72.04	324	15300	118.6							365	10800	0.9					250	11400	63.16	276	16100	167.03							345	11400	3.33	206	16100	87.82
269	10800	55.49	324	15300	121.23							366	10800	63.97					250	11400	67.19	276	16100	190.55							346	11400	248.76	206	16100	100.24
269	10800	72.3	324	15300	123.95							393	15300	39.46					252	11400	157.11	276	16100	207.07							347	11400	24.7	206	16100	109.89
269	10800	81.73	324	15300	129.44							393	15300	49.13					252	11400	162.61	281	16100	22.86							348	11400	12.08	206	16100	115.16
269	10800	85.46	324	15300	132.07							393	15300	52.97					252	11400	172.82	281	16100	28.17							348	11400	15.96	207	16100	87.72
269	10800	95.48	324	15300	135.69							393	15300	56.7					252	11400	183.88	281	16100	34.66							348	11400	29.14	207	16100	96.17
275	15300	46.13	324	15300	138.52							393	15300	59.33					252	11400	187.41	281	16100	72.76							349	11400	41.72	207	16100	122.09
275	15300	52.76	324	15300	146.12							393	15300	61.97					256	11400	72.34	281	16100	125.57							349	11400	51.96	208	16100	40.45
275	15300	165.1	324	15300	154.52							393	15300	72.61					256	11400	109.24	281	16100	134.46							349	11400	129.54	208	16100	48.99
288	10800	233.3	324	15300	159.94							393	15300	75.28					256	11400	124.42	284	16100	240.27							349	11400	148.18	208	16100	53.29
290	10800	118.14	324	15300	165.87							393	15300	79.19					256	11400	144.07	285	16100	0.5							351	11400	184.03	208	16100	226.92
290	10800	124.32	324	15300	170.74							393	15300	82.03					256	11400	161.63	285	16100	21.89							352	16100	70.39	209	16100	13.78
290	10800	132.79	325	15300	143.63							393	15300	84.68					256	11400	165.83	285	16100	33.01							352	16100	82.99	209	16100	51.66
290	10800	147.24	325	15300	160.25							393	15300	87.6					257	11400	141.64	285	16100	38.66							352	16100	102.77	210	16100	21.03
290	10800	154.45	325	15300	163.31							393	15300	92.8					257	11400	145.79	285	16100	68.6							352	16100	109.59	210	16100	33.73
290	10800	165.19	325	15300	168.59							393	15300	96.3					257	11400	148.51	285	16100	77.81							352	16100	122.54	211	16100	52.46
290	10800	170.59	325	15300	176.28							393	15300	99.22					257	11400	157.19	289	16100	87.62							353	11400	147.04	212	16100	64.21
290	10800	175.52	325	15300	179.03							393	15300	101.85					257	11400	161.04	289	16100	93.3							355	11400	169.69	212	16100	86.91
290	10800	180.81	325	15300	184.16							393	15300	107.05					257	11400	172.39	289	16100	97.29							356	16100	112.11	212	16100	90.11
290	10800	197.91	325	15300	197.66							393	15300	114.87					262	11400	13.7	289	16100	103.98							356	16100	114.79	213	11400	46.64
294	15300	39.5	325	15300	209.84														262	11400	102.06	289	16100	121.31							356	16100	117.43	214	16100	22.18
294	15300	75.28	326	15300	112.11														262	11400	107.43	290	16100	87.46							356	16100	120.39	215	16100	1.4
294	15300	80.07	326	15300	140.86														262	11400	113.02	291	16100	33.48							356	16100	137.43	215	16100	5.49
303	15300	70	326	15300	152.85														262	11400	118.5	291	16100	36.41							357	11400	130.17	215	16100	38.26
303	15300	83.75	326	15300	155.79														262	11400	124.29	291	16100	45.41							357	11400	142.28	216	16100	16.53
310	15300	44.8	326	15300	161.5														263	11400	67.79	291	16100	54.67							357	11400	156.31	216	16100	23.09
310	15300	53.86	327	15300	3.45														263	11400	89.61	291	16100	58.42							357	11400	208.91	217	16100	23.5
310	15300	65.72	341	15300	190.6														269	11400	115.55	294	16100	93.18							359	11400	60.17	217	16100	45.81
310	15300	72.6	341	15300	197.66														269	11400	130.12	294	16100	101.16							359	11400	77.95	218	16100	37.02
317	15300	21.13	343	10800	79.37														273	11400	103.26	294	16100	105.11							359	11400	80.77	218	16100	41.08
317	15300	39.62	348	10800	145.53														273	11400	214.75	299	16100	50.91							359	11400	83.51	218	16100	87.07
317	15300	45.21	348	10800	162.56														273	11400	219.64	299	16100	55.29							359	11400	152.12	219	16100	65.48
317	15300	48.76	348	10800	165.36														273	11400	233.76	299	16100	61.28							361	11400	76.03	220	16100	94.27
317	15300	56.84	348	10800	167.99														275	11400	68.65	299	16100	196.57							361	11400	118.15	221	16100	79.18
317	15300	60.77	350	15300	180.19														276	11400	17.27	299	16100	199.62							362	16100	197.65	221	16100	102.12
317	15300	67.13	350	15300	188.61														276	11400	25.01	299	16100	202.25							364	11400	68.44	222	16100	77.8
317	15300	69.76	350	15300	194.2														276	11400	28.7	301	16100	136.8							364	11400	117.14	222	16100	85.56
317	15300	74.09	350	15300	198.63														276	11400	33.39	306	16100	131.88							364	11400	120.87	223	16100	92.09
318	10800	94.67	350	15300	201.85														276	11400	48.04	306	16100	190.91							364	11400	135.44	224	16100	50.8
318	10800	123.52	350	15300	204.67														280	11400	75.94	306	16100	198.11							366	11400	4.96	225	11400	16.21
318	10800	154.22	350	15300	207.47														280	11400	89.5	306	16100	201.86							367	16100	201.88	225	11400	25.76
322	10800	221.77	350	15300	211.74														280	11400	126.41	306	16100	205.56							368	11400	216.88	225	11400	35.51
322	10800	228.31	350	15300	217.86														280	11400	145.01	309	16100	83.25							368	11400	227.59	226	16100	3.85
322	10800	233.68	350	15300	221.62														280	11400	162.66	310	16100	67.43							369	11400	13.69	226	16100	23.8
322	10800	237.29	350	15300	225.59														280	11400	166.85	310	16100	71.86							369	11400	23.59	226	16100	221.11
322	10800	241.86	350	15300	230.85														284	11400	230.43	310	16100	79.58							370	11400	158.68	226	16100	234.88
322	10800	246.25	352	15300	46.96														284	11400	235.68	310	16100	89.06							372	11400	42.93	226	16100	243.91
323	10800	1.66	352	15300	51.81														284	11400	239.93	310	16100	94.92							372	11400	47.14	228	16100	50.34
323	10800	5.18	352	15300	58.32														285	11400	90.06	314	11400	86.44							372	11400	94.47	228	16100	54.15
323	10800	16.38	352	15300	79.27														285	11400	110.31	314	11400	118.15							372	11400	115.92	228	16100	78.61
323	10800	22.19	356	10800	74.17														286	11400	108.57	314	11400	133.34							372	11400	136.51	229	16100	84.17
323	10800	25.05	356	10800	77.87														286	11400	114.56	314	11400	137.54							372	11400	139.33	229	16100	90.81
323	10800	31	356	10800	80.99														286	11400	163.78	314	11400	151.98							373	11400	217.68	230	16100	65
323	10800	33.63	356	10800	84.68														290	11400	140.96	317	16100	149.09							373	11400	222.69	231	11400	8.82
327	10800	28.66	356	10800	93.43														290	11400	144.3	317	16100	154.87							373	11400	226.62	231	11400	33.33
327	10800	36.3	363	15300	124.83														290	11400	155.57	317	16100	182.8							373	11400	232.96	231	11400	35.97
327	10800	42.76	363	15300	127.64														290	11400	159.24	317	16100	185.56							373	11400	242.56	231	11400	236.31
327	10800	45.42	363	15300	132.62														294	11400	51.37	317	16100	189.04							374	16100	25.46	232	16100	24.18
328	10800	63.58	363	15300	138.87														297	16100	43.46	319	16100	242.92							375	11400	72.86	233	16100	42.55
328	10800	66.41	363	15300	144.02														297	16100	46.26	320	16100	3.19							375	11400	92.47	234	16100	49.3
328	10800	73.02	363	15300	146.65														297	16100	72.23	320	16100	15.52							375	11400	105.29	235	16100	72.71
328	10800	75.65	363	15300	149.51														297	16100	91.23	321	11400	186.05							376	11400	241.92	235	16100	88.22
328	10800	78.72	363	15300	156.48														297	16100	95.21	321	11400	196.49							378	11400	85.94	235	16100	122.66
328	10800	82.13	363	15300	161.8														297	16100	203.6	324	16100	71.83							378	11400	88.58	236	16100	82.28
328	10800	84.76	368	10800	41.29														299	11400	21.8	324	16100	82.46							378	11400	130.75	236	16100	104.21
328	10800	88.82	372	15300	112.41														299	11400	66.18	324	16100	89.92							378	11400	134.72	236	16100	141.75
328	10800	91.96	372	15300	119.68														299	11400	90.79	327	16100	178.13							378	11400	137.45	237	16100	108.73
328	10800	95.41	372	15300	122.31														300	11400	187.53	327	16100	237.22							380	11400	36.93	238	11400	42.79
328	10800	104.6	372	15300	132.41														300	11400	205.83	327	16100	245.37							380	11400	46.12	238	11400	62.52
328	10800	115.41	372	15300	138.55														300	11400	246.03	327	16100	249.67							380	11400	61.92	239	16100	47.62
328	10800	124.32	372	15300	145.76														301	11400	0.32	328	16100	3.55							380	11400	65.93	239	16100	234.01
344	10800	194.39	372	15300	150.16														304	11400	10.11	328	16100	10.31							381	11400	164.48	240	16100	222.07
344	10800	198.85	372	15300	152.84														304	11400	27.61	329	16100	145.2							383	11400	42.81	241	16100	2.23
344	10800	202.1	372	15300	159.21														304	11400	94.19	329	16100	150.37							383	11400	67.88	241	16100	24.92
344	10800	206.99	372	15300	164.26														309	11400	187.74	329	16100	154.4							383	11400	71.69	241	16100	28.87
344	10800	210.05	374	15300	19.94														309	11400	191.49	329	16100	166.07							383	11400	83.01	242	11400	43.81
344	10800	218.21	374	15300	24.79														309	11400	194.46	331	16100	126.1							383	11400	102.12	242	11400	67.35
344	10800	223.18	375	15300	79.66														309	11400	197.47	331	16100	138.04							384	11400	243.67	243	16100	78.6
344	10800	227.27	378	15300	208														309	11400	203.88	331	16100	142.7							385	11400	3.32	244	16100	139.59
349	15300	29.03	378	15300	215.49														309	11400	207.28	331	16100	196.64							385	11400	18.33	245	16100	142.65
349	15300	38.05	378	15300	226.51														310	11400	20.98	331	16100	248.7							385	11400	21.22	247	11400	11
349	15300	53.97	390	10800	32.26														310	11400	32.46	332	16100	28.61							385	11400	30.03	247	11400	158.46
349	15300	58.64	390	10800	51.12														310	11400	46.24	336	16100	21.35							386	11400	39.79	248	16100	103.1
349	15300	62.03	390	10800	74.09														310	11400	60.52	336	16100	28.8							386	11400	44.45	248	16100	125.81
349	15300	66.04	391	15300	65.15														312	11400	41.93	336	16100	59.25							386	11400	63.05	249	16100	61.79
349	15300	70.35	400	15300	73.83														312	11400	111.81	336	16100	76.67							386	11400	95.45	249	16100	171.24
349	15300	74.02	400	15300	81.15														315	11400	52.01	341	16100	42.73							386	11400	115.09	250	16100	52.74
349	15300	80.66	400	15300	87.94														315	11400	55.17	341	16100	60.03							387	11400	223.89	250	16100	62.74
349	15300	96.53	400	15300	106.18														315	11400	61.43	341	16100	63.95							387	11400	236.96	250	16100	105
349	15300	101.66	400	15300	119.44														315	11400	66.68	341	16100	69.83							388	11400	4.83	251	11400	55.7
360	10800	69.07	400	15300	145.84														316	11400	207.01	341	16100	134.86							388	11400	13.22	251	11400	79.59
360	10800	76.53	400	15300	151.58														316	11400	210.26	342	16100	113.8							388	11400	24.21	252	16100	208.42
360	10800	81.15																	316	11400	214.51	342	16100	149.09							388	11400	29.1	253	16100	108.53
360	10800	85.52																	316	11400	224.94	343	11400	137.24							390	11400	54.73	254	16100	107.58
360	10800	95.58																	319	11400	75.7	343	11400	143.73							391	11400	238.9	254	16100	160.05
360	10800	101.03																	319	11400	85.81	346	16100	137.59							392	11400	67.25	255	16100	207.47
360	10800	107.57																	320	11400	233.39	347	11400	140.41							394	16100	58.45	257	16100	114.36
360	10800	120.99																	320	11400	242.25	347	11400	147.15							394	16100	95.21	258	16100	38.36
360	10800	131.8																	321	11400	12.69	347	11400	152.23							394	16100	99.43	258	16100	46.4
361	15300	33.32																	323	11400	25.65	347	11400	176.91							394	16100	107.14	258	16100	52.25
361	15300	38.52																	323	11400	48.28	347	11400	187.05							395	11400	110.69	258	16100	82.48
361	15300	50.64																	323	11400	67.07	348	16100	6.64							395	11400	164.4	258	16100	87.38
361	15300	53.49																	323	11400	76.59	352	16100	237.69							395	11400	168.19	259	16100	58.38
361	15300	60.6																	326	11400	27.82	353	16100	157.5							397	11400	157.28	260	16100	136.57
361	15300	63.79																	326	11400	53.95	353	16100	161.32							398	11400	5.78	261	16100	243.93
361	15300	66.84																	326	11400	87.71	353	16100	166.04							398	11400	9.91	262	16100	56.29
361	15300	70.3																	329	11400	129.5	353	16100	178.43							398	11400	98.82	262	16100	136.59
361	15300	73.55																	329	11400	133.51	353	16100	191.28							398	11400	113.41	262	16100	142.61
361	15300	79.88																	330	11400	35.67	353	16100	204.74							398	11400	119.84	262	16100	146.53
361	15300	82.51																	330	11400	40.99	353	16100	222.29							398	11400	122.62	262	16100	150.51
361	15300	92.09																	330	11400	44.3	358	16100	128.51							398	11400	131.29	263	16100	100.56
361	15300	95.87																	330	11400	62.59	358	16100	187.88							399	11400	248.77	263	16100	104.91
361	15300	98.8																	330	11400	99.56	358	16100	192.73							400	11400	31.89	263	16100	119.24
362	10800	137.69																	330	11400	109.35	358	16100	195.36							400	11400	44.58	263	16100	128.49
362	10800	142.49																	330	11400	124.24	358	16100	231.02										264	11400	73.25
362	10800	150.06																	330	11400	134.39	358	16100	236.39										265	16100	83.36
362	10800	155.61																	337	16100	50.83	359	16100	32.85										266	16100	57.62
362	10800	158.89																	337	16100	105.44	359	16100	100.29										267	16100	57.04
362	10800	172.42																	337	16100	114	359	16100	103.67										267	16100	80.58
363	10800	120.59																	337	16100	185.12	359	16100	111.9										268	16100	58.64
384	15300	55.39																	337	16100	222.97	359	16100	115.99										268	16100	82.21
384	15300	63.66																	337	16100	229.06	359	16100	126.65										269	16100	233.35
384	15300	78.44																	337	16100	232.79	359	16100	136.06										271	16100	79.04
384	15300	88.77																	338	11400	16.88	360	11400	103.8										271	16100	100.78
384	15300	100.38																	341	11400	28.88	360	11400	117.17										271	16100	108.54
384	15300	103.32																	341	11400	42.02	366	16100	76.46										271	16100	129.52
384	15300	114.1																	341	11400	98.42	366	16100	86.73										271	16100	147.2
384	15300	117.11																	341	11400	103.78	366	16100	90.71										271	16100	180.83
384	15300	151.9																	341	11400	106.51	366	16100	118.45										272	11400	196.68
386	10800	160.3																	341	11400	111.33	368	16100	36.16										273	16100	63.67
386	10800	201.79																	341	11400	123.79	368	16100	40.78										274	16100	77.8
386	10800	208.34																	341	11400	128.67	372	16100	71.33										275	16100	220.28
386	10800	213.47																	343	11400	155.94	372	16100	75.84										277	16100	45.17
386	10800	220.26																	348	11400	103.25	372	16100	79.65										277	16100	72.82
388	10800	5.59																	348	11400	114.15	372	16100	88.16										277	16100	99.86
388	10800	16.94																	348	11400	124.18	372	16100	91.05										277	16100	116.12
388	10800	22.28																	348	11400	128.65	372	16100	109.15										278	16100	59.22
388	10800	27.57																	348	11400	147.71	375	16100	143.23										278	16100	84.84
388	10800	33.36																	348	11400	223.83	375	16100	227.05										278	16100	120.52
388	10800	36.37																	348	11400	226.47	375	16100	234.39										279	16100	132.82
388	10800	39.97																	348	11400	235.58	375	16100	240.51										279	16100	136.69
388	10800	43.86																	348	11400	249.84	380	16100	128.91										279	16100	171.5
388	10800	53.25																	351	16100	26.42	380	16100	152.15										279	16100	200.57
388	10800	56.31																	351	16100	40.38	383	16100	48.49										280	16100	7.98
388	10800	62.71																	353	11400	132.89	388	16100	217.38										280	16100	109.7
388	10800	77.67																	353	11400	159.26	388	16100	234.74										280	16100	114.55
389	15300	27.37																	353	11400	190.93	388	16100	248.55										280	16100	124.67
389	15300	33.73																	353	11400	203.09	390	11400	178.84										281	16100	176.01
389	15300	52.09																	353	11400	217.22	390	11400	243.42										281	16100	181.89
400	15300	35.18																	355	11400	24.38	390	11400	247.22										281	16100	186.89
400	15300	39.24																	355	11400	29.94	391	16100	1.26										281	16100	192.61
400	15300	49.21																	355	11400	34.16	391	16100	33.89										281	16100	218.9
400	15300	60.79																	355	11400	50.12	395	11400	49.89										282	16100	97.69
400	15300	68.17																	358	11400	179.39	395	11400	53.58										284	16100	149.88
400	15300	71.82																	358	11400	183.19	397	16100	204.86										285	16100	36.36
400	15300	75.31																	358	11400	188.8	398	16100	72.98										285	16100	41.34
400	15300	82.99																	358	11400	194.31	398	16100	87.68										285	16100	57.54
400	15300	85.77																	358	11400	196.98	398	16100	93.24										286	16100	60.46
400	15300	88.65																	358	11400	202.49	398	16100	96.02										286	16100	105.97
400	15300	100.91																	358	11400	207.03	398	16100	99.82										286	16100	117.41
																			358	11400	229.89	400	16100	51.28										286	16100	129.54
																			362	16100	104.44	400	16100	71.25										287	16100	108.19
																			362	16100	211.62	400	16100	74.87										287	16100	134.93
																			363	11400	20.02	400	16100	98.17										287	16100	140.86
																			364	11400	177.7	400	16100	112.37										287	16100	176.47
																			365	11400	20.35													289	16100	38.62
																			365	11400	35.64													289	16100	42.47
																			365	11400	43.33													290	16100	195.15
																			367	11400	41.53													292	11400	38.29
																			367	11400	99.02													292	11400	43.15
																			367	11400	111.58													292	11400	57.52
																			367	11400	124.83													292	11400	120.99
																			371	11400	171.94													292	11400	125.38
																			371	11400	183.78													293	16100	159.76
																			372	11400	50.75													293	16100	173.16
																			372	11400	69.37													293	16100	226.64
																			372	11400	73.46													295	16100	48.45
																			372	11400	94.92													295	16100	52.53
																			374	11400	218.52													296	16100	68.87
																			374	11400	230.55													296	16100	114.01
																			374	11400	239.48													296	16100	117.72
																			376	11400	3.16													297	16100	64.19
																			376	11400	87.2													297	16100	107.39
																			376	11400	91.42													297	16100	111.58
																			376	11400	94.4													297	16100	159.96
																			376	11400	104.89													297	16100	193.44
																			376	11400	112.53													299	16100	48.07
																			376	11400	116.52													299	16100	79.44
																			380	11400	229.63													299	16100	86.09
																			380	11400	232.26													299	16100	89.91
																			380	11400	235.06													300	16100	234.81
																			380	11400	239.58													301	16100	23.18
																			381	11400	30.21													301	16100	214.73
																			381	11400	35.34													301	16100	219.06
																			383	11400	48.18													301	16100	222.62
																			383	11400	57.97													301	16100	226.55
																			383	11400	64.19													301	16100	231.21
																			383	11400	68.12													302	16100	32.79
																			383	11400	72.5													303	16100	154.74
																			383	11400	111.48													303	16100	158.61
																			383	11400	138.23													303	16100	166.52
																			383	11400	219.57													303	16100	170.65
																			384	11400	126.47													303	16100	180.02
																			384	11400	129.59													304	16100	207.82
																			384	11400	133.06													305	11400	1.19
																			384	11400	142.29													305	11400	4.09
																			384	11400	150.39													305	11400	7.55
																			384	11400	173.38													305	11400	193.96
																			388	16100	29.18													305	11400	198.23
																			388	16100	39.6													305	11400	206.91
																			388	16100	55.57													307	16100	99.91
																			388	16100	226.97													308	16100	46.45
																			393	11400	32.6													308	16100	57.76
																			393	11400	102.8													308	16100	79.48
																			393	11400	127.34													308	16100	88.03
																			393	11400	131.76													308	16100	91.81
																			393	11400	139.84													308	16100	98.77
																			393	11400	142.96													308	16100	153.19
																			397	11400	110.5													310	16100	50.1
																			397	11400	117.78													310	16100	57.96
																			397	11400	197.2													310	16100	64.49
																			397	11400	204.91													310	16100	94.73
																			398	11400	244.18													311	16100	59
																			398	11400	249.97													311	16100	139.97
																			399	11400	6.82													311	16100	162.8
																																		312	16100	48.09
																																		315	16100	98.27
																																		315	16100	101.99
																																		316	16100	27.01
																																		316	16100	37.73
																																		316	16100	42.72
																																		316	16100	54.59
																																		316	16100	80.98
																																		319	11400	31.35
																																		319	11400	41.23
																																		319	11400	165.85
																																		319	11400	178.18
																																		319	11400	180.92
																																		319	11400	213.34
																																		320	16100	18.92
																																		321	16100	56.8
																																		321	16100	90.01
																																		321	16100	109.46
																																		321	16100	118.3
																																		323	16100	107.26
																																		323	16100	132.6
																																		325	16100	69.16
																																		325	16100	80.61
																																		325	16100	93.62
																																		325	16100	117.39
																																		325	16100	144.88
																																		326	16100	93.15
																																		326	16100	109.98
																																		326	16100	135.43
																																		328	16100	15.12
																																		328	16100	44.01
																																		328	16100	59.95
																																		329	16100	207.81
																																		329	16100	210.44
																																		329	16100	214.19
																																		329	16100	218.08
																																		329	16100	222.65
																																		329	16100	231.26
																																		330	16100	76.41
																																		330	16100	88.7
																																		330	16100	115.05
																																		330	16100	117.93
																																		331	16100	210.88
																																		331	16100	223.37
																																		331	16100	227.73
																																		331	16100	236.12
																																		332	16100	13.11
																																		334	16100	227.38
																																		335	16100	25.3
																																		335	16100	33.27
																																		335	16100	38.51
																																		335	16100	88.32
																																		335	16100	103.11
																																		337	11400	41.23
																																		337	11400	43.89
																																		337	11400	93.33
																																		337	11400	98.01
																																		337	11400	113.23
																																		337	11400	144.2
																																		338	16100	155.67
																																		338	16100	178.38
																																		339	16100	108.02
																																		339	16100	148.22
																																		339	16100	167.91
																																		341	16100	32.37
																																		341	16100	37.89
																																		341	16100	41.96
																																		341	16100	52.8
																																		341	16100	93.1
																																		342	16100	187.89
																																		343	16100	225.28
																																		344	16100	247.61
																																		345	16100	16.89
																																		345	16100	33.62
																																		345	16100	39.69
																																		345	16100	68.8
																																		345	16100	105.2
																																		349	16100	34.7
																																		349	16100	38.51
																																		349	16100	55.19
																																		350	16100	24.59
																																		350	16100	27.82
																																		350	16100	31.44
																																		350	16100	100.39
																																		350	16100	105.03
																																		350	16100	244.82
																																		352	16100	29.41
																																		354	16100	246.14
																																		355	11400	16.62
																																		356	16100	18.14
																																		356	16100	42.47
																																		356	16100	48.34
																																		356	16100	54
																																		356	16100	103.44
																																		357	16100	232.58
																																		359	16100	235.72
																																		359	16100	239.44
																																		360	16100	13.63
																																		360	16100	16.66
																																		360	16100	24.66
																																		360	16100	117.48
																																		360	16100	135.67
																																		360	16100	142.44
																																		362	16100	149.73
																																		362	16100	153.72
																																		362	16100	157.23
																																		362	16100	183.38
																																		362	16100	226.55
																																		362	16100	232.43
																																		363	16100	234.27
																																		363	16100	239.94
																																		363	16100	247.99
																																		364	16100	26.11
																																		364	16100	58.95
																																		364	16100	166.03
																																		364	16100	220.87
																																		365	16100	146.37
																																		365	16100	149.95
																																		365	16100	156.19
																																		365	16100	161.71
																																		366	16100	56.21
																																		366	16100	82.39
																																		369	16100	133.47
																																		369	16100	137.17
																																		371	11400	71.34
																																		371	11400	99.12
																																		372	16100	190.64
																																		372	16100	195.67
																																		372	16100	203.14
																																		372	16100	217.29
																																		372	16100	224.16
																																		374	16100	144
																																		374	16100	175.03
																																		374	16100	190.48
																																		374	16100	197.87
																																		375	16100	34.56
																																		375	16100	46.42
																																		375	16100	90.67
																																		375	16100	134.97
																																		378	16100	7.02
																																		378	16100	12.36
																																		378	16100	16.37
																																		378	16100	72.25
																																		379	16100	130.67
																																		379	16100	135.11
																																		379	16100	138.92
																																		379	16100	142.29
																																		379	16100	210.73
																																		379	16100	216.86
																																		379	16100	226.2
																																		379	16100	235.08
																																		379	16100	245.49
																																		381	16100	95.77
																																		381	16100	99.39
																																		381	16100	112.13
																																		383	11400	75.52
																																		383	11400	87.03
																																		383	11400	175.8
																																		383	11400	226.46
																																		384	16100	113.31
																																		384	16100	122
																																		384	16100	147.77
																																		388	11400	2.08
																																		388	11400	7.08
																																		388	11400	141.55
																																		388	11400	167.83
																																		388	11400	174.46
																																		389	16100	90.79
																																		390	16100	0.76
																																		390	16100	60.11
																																		390	16100	87.58
																																		390	16100	97.84
																																		390	16100	124.42
																																		392	11400	33.5
																																		392	11400	37.33
																																		392	11400	46.04
																																		393	16100	6.32
																																		393	16100	232.18
																																		393	16100	238.14
																																		393	16100	246.86
																																		394	16100	11
																																		394	16100	30.56
																																		394	16100	46.09
																																		394	16100	108.11
																																		399	16100	93.24
																																		399	16100	112.08
																																		399	16100	116.9
																																		399	16100	121.11
																																		399	16100	125.62
																																		399	16100	170.74
																																		400	16100	43.46
																																		400	16100	96.66
																																		400	16100	167.51
