# Supplementary material for: Acetylcholine modulates the precision of prediction error in the auditory cortex
Source: eLife. 2024 Jan 19;12:RP91475. doi: 10.7554/eLife.91475 (PMC10942646; doi:10.7554/eLife.91475)
Supplement: Figure 4—source data 1. [file elife-91475-fig4-data1.xlsx]

## Sheet: Figure 4
BW10 (oct)		BW30 (oct)
Control	Effect	Control	Effect
0.667661	0.667661	0.829629	1.16591
0.540568	0.347923	1	0.830075
1.66595	0.660308	NaN	NaN
0.665951	NaN	NaN	NaN
0.333243	0.667661	0.663717	1.03953
1.42071	0.660308	1.33324	1.50175
0.665951	2.16278	0.834457	2.33271
0.499155	1	1	NaN
0.333022	NaN	NaN	NaN
1.15987	0.988685	1.15987	1.66802
0.331982	0.336283	1.16197	1.16636
0.330473	0.330473	1.83007	0.50166
1.49916	NaN	NaN	NaN
0.660308	NaN	0.660308	NaN
0.670432	NaN	2.85086	NaN
1	1	2.32193	2.32193
0.496607	4.02841	1	0.995987
0.501749	0.667661	0.996425	0.501749
0.499155	NaN	0.996425	NaN
0.660308	0.49834	0.831494	1
0.334639	0.331982	0.334639	1.99599
1.66766	NaN	2.50489	NaN
0.328326	0.169925	1.66372	0.169925
0.330473	1.17218	0.50166	NaN
0.666757	NaN	1.32193	NaN
0.499155	0.333243	0.830075	0.501749
0.667661	NaN	0.829629	NaN
0.658211	NaN	NaN	NaN
2.34239	NaN	2.8625	NaN
0.678072	NaN	NaN	NaN
1	1.152	1.8625	1.94342
0.833642	1.03953	3.81876	2.17632
0.668018	0.837943	1.65896	1.67807
0.333243	0.499155	0.665951	0.834457
0.332708	NaN	NaN	NaN
0.171187	NaN	NaN	NaN
0.334639	0.16711	0.647427	0.307931
0.663717	0.830075	1.99642	1.83446
0.321928	0.321928	1.48543	1.67807
1.82782	NaN	NaN	NaN
0.505891	NaN	NaN	NaN
2.82018	0.678072	3.66676	2.32193
0.485427	0.847997	2.03242	2.13245
0.499155	0.499155	0.996425	NaN
0.671674	0.834457	NaN	1.66595
0.667661	0.499155	0.829629	0.501749
0.667661	0.333243	0.829629	0.829629
0.333022	NaN	0.665951	NaN
0.667661	0.333022	0.996425	0.665951
0.829629	0.333243	1.96428	0.334639
0.336283	2.98995	0.336283	NaN
0.496607	3.02841	1.16591	4.09552
0.331982	1.32797	1.99599	1.49916
0.503168	2.17218	1.32797	2.50489
1	1.16993	1.49825	1.83894
0.670432	NaN	0.670432	NaN
0.330473	0.330473	1.32698	2.70044
0.501749	0.663717	1.16993	1
3.8625	3.01282	4.03242	4.19878
0.347923	0.347923	2.29956	2.19265
1.66297	0.829629	2.17218	2.50489
0.339692	0.833642	0.339692	1
1.29956	0.459432	1.848	1.29956
0.499155	0.333243	0.499155	0.663717
0.943416	0.289507	1.18442	2
0.499818	NaN	0.499818	NaN
NaN	0.333022	NaN	NaN
0.665951	NaN	0.996425	NaN
0.321928	0.321928	1.16993	1.46949
1.99642	NaN	1.83446	NaN
0.333022	0.667661	0.834457	0.996425
0.667661	0.499155	1.49476	0.834457
0.334639	0.589212	1.16278	0.834457
1.16591	1.16636	1.50175	NaN
1.16206	0.336283	1.49916	1.82963
0.499155	0.333022	0.829629	1.16278
0.501749	0.829629	0.834457	1.16278
0.330473	0.501749	1.49825	0.671674
0.671674	0.671674	1.32833	0.501749
0.994947	0.49834	1.66297	1.49661
0.378512	0.485427	NaN	1.8625
0.485427	0.347923	1.19265	0.63743
0.330473	0.331982	1.49661	0.331982
0.328326	0.330473	1.16613	NaN
1	0.289507	1.46949	1.83007
0.667661	NaN	0.995987	NaN
1.83446	1.66372	NaN	NaN
0.994947	0.660308	0.660308	1.49661
0.331982	0.503168	1.49683	1.16197
0.347923	1.1375	1	1
0.499818	NaN	0.542697	NaN
0.330473	1.66766	1	1.82963
1.16851	1.66595	1.66372	2
0.678072	1.32193	1	NaN
0.333022	1.33628	0.834457	1.67043
0.667661	NaN	NaN	NaN
NaN	NaN	0.665951	NaN
0.667661	NaN	0.996425	NaN
0.830075	1	1	1.33628
1.49661	2.33809	1.99642	2.33271
NaN	1.66676	NaN	NaN
1	0.331982	1.49661	0.994947
1.32797	1.65517	1.82963	1.49916
0.330473	0.496607	0.830075	0.995987
