# Supplementary material for: Acetylcholine modulates the precision of prediction error in the auditory cortex
Source: eLife. 2024 Jan 19;12:RP91475. doi: 10.7554/eLife.91475 (PMC10942646; doi:10.7554/eLife.91475)
Supplement: Figure 5—source data 1. [file elife-91475-fig5-data1.xlsx]

## Sheet: Figure 5
	CSI		Control CSI 95% CI			DEV Firing rate		STD Firing rate			ROC AUC		Mutual Information
Unit order	Control	Effect	Lower bound	Higher bound		Control	Effect	Control	Effect		Control	Effect	Control	Effect
1	0.0588235	0.139711	-0.150124	0.224425		0.833333	0	0.222222	0.185185		0.748264	0.725573	0.101507	0.0961063
2	0.0619866	0.5	-0.168398	0.264711		22.6667	20.5	1.38889	1.11111		0.534028	0.504158	0.00135065	0.00397113
3	0.142232	0.00309598	-0.212253	0.400034		1.66667	0.666667	1.94444	2.18519		0.58421	0.556345	-0.0107049	0.0155737
4	0.151515	0.0703883	-0.252214	0.386841		3.16667	2.33333	1.68519	0.796296		0.699227	0.679036	0.0971312	0.0703788
5	0.176066	0.5	0.126916	0.222446		11.8333	1.16667	8.53704	0.722222		0.853984	0.553316	0.14925	0.0100025
6	0.185152	0.467961	-0.002474	0.319357		10	0.166667	8.59259	1.98148		0.774835	0.677569	0.101304	0.0528167
7	0.233928	0.0917301	0.186605	0.281973		14.8333	6.83333	8.48148	0.555556		0.849887	0.662873	0.129055	0.028491
8	0.236052	-0.0149254	-0.0433548	0.419924		4.5	5.16667	0.222222	0.555556		0.843342	0.786684	0.178019	0.138562
9	0.261803	0.0446965	0.067333	0.417213		3.83333	3.83333	0.277778	0.685185		0.660113	0.631658	0.0459366	0.0322359
10	0.272251	0.522901	0.0852024	0.419607		7.83333	6.16667	0.851852	4.11111		0.674696	0.724375	0.0511322	0.0620997
11	0.287854	0.126154	0.0184314	0.475012		16	5.33333	2.75926	5.2037		0.633533	0.779054	0.0237132	0.0797489
12	0.294798	0.117241	0.081568	0.471788		14.1667	22	1.59259	21.9444		0.573585	0.818229	0.00152041	0.103777
13	0.305495	0.554775	-0.027027	0.519318		11.6667	9	1.62963	0.351852		0.542266	0.80559	-0.00197609	0.102929
14	0.336634	0.3725	0.18516	0.472058		4.83333	1	0.648148	1.64815		0.919653	0.875061	0.207216	0.161433
15	0.341718	0.00371747	0.153634	0.506864		24.6667	13.5	5.51852	3.09259		0.796658	0.8802	0.0904142	0.173595
16	0.34914	0.142308	0.251238	0.427186		10.3333	3.5	1.01852	2.09259		0.662422	0.590894	0.0348529	0.0152145
17	0.35343	0.353644	0.294575	0.40699		19	6.16667	1.7037	1.88889		0.689722	0.656528	0.0480417	0.0365936
18	0.356522	0.459459	0.191879	0.473923		58.5	47	2.7963	3.44444		0.574392	0.60592	0.0212124	0.00879129
19	0.359184	0.480217	0.0904472	0.545627		16.6667	9.83333	5.81481	4.01852		0.542561	0.620816	0.00144868	0.0336885
20	0.365748	0.838028	0.285721	0.432446		18.3333	11.3333	4.7963	4.18519		0.937578	0.989054	0.240951	0.398479
21	0.386037	0.50838	0.3321	0.43687		3.33333	4.33333	1.14815	1.12963		0.819115	0.689262	0.120955	0.0415577
22	0.398184	0.437859	0.325097	0.466077		7	10.1667	0.944444	1.51852		0.775911	0.568498	0.0727176	0.0179997
23	0.400743	0.721254	0.355824	0.443237		8.66667	8	0.796296	1.62963		0.810668	0.722535	0.0487039	0.0469416
24	0.418719	0.605195	0.0424003	0.636364		13.1667	3	2.25926	0.12963		0.88737	0.705217	0.148746	0.0210106
25	0.442509	0.494175	0.388517	0.495717		3.16667	10.5	1.85185	2.75926		0.70974	0.736441	0.0731072	0.070095
26	0.453639	0.222222	0.291219	0.568005		5.5	15	1.2963	3.72222		0.886884	0.787031	0.210454	0.178159
27	0.454545	0.316038	0.0886246	0.664081		6.5	13.1667	2.48148	3.90741		0.971736	0.625304	0.363334	0.01412
28	0.467085	0.594673	0.28914	0.59921		2.5	9	2.66667	3.03704		0.685842	0.565443	0.0840988	-0.0142613
29	0.483731	0.429498	0.325326	0.59995		0.833333	9.83333	0.666667	2.27778		0.779566	0.552509	0.130197	0.0285334
30	0.514654	0.73494	0.462297	0.561595		1.83333	7.33333	0.425926	1.94444		0.737491	0.63322	0.0779539	0.00502225
31	0.522013	0.577258	0.443779	0.594335		27.8333	21.5	3.03704	3.53704		0.6525	0.574653	0.00472949	0.0032549
32	0.532258	0.517629	0.433778	0.606354		31.5	30.5	4.40741	6.62963		0.723655	0.555408	0.0751406	0.0239314
33	0.534714	0.441362	0.386658	0.636959		31	28.5	6.83333	6.31481		0.88342	0.649852	0.210875	0.0807775
34	0.540678	0.509146	0.418653	0.634549		13.3333	29.1667	4.77778	5.44444		0.874896	0.849158	0.131563	0.117712
35	0.542857	0.5744	0.31629	0.681155		7.66667	4	2.7963	1.53704		0.884922	0.530599	0.140952	0.0115086
36	0.551167	0.694118	0.370497	0.677981		5.83333	1.5	2.27778	1.96296		0.750964	0.524392	0.0873591	0.00918607
37	0.558748	0.671646	0.492822	0.613287		11.6667	6	2.61111	1.53704		0.747839	0.515946	0.088744	0.00612952
38	0.561715	0.354062	0.512851	0.610094		5.16667	3.16667	2.40741	1.44444		0.647092	0.520165	0.0223159	0.00212469
39	0.5625	0.964789	0.432653	0.659659		2.83333	7	1.18519	3.14815		0.654766	0.504167	0.0145608	1.63069e-05
40	0.562874	0.637755	0.461675	0.640284		3.33333	10.6667	1.72222	3.05556		0.915122	0.852847	0.218215	0.179182
41	0.581463	0.558146	0.518538	0.642214		3.33333	15.5	1.35185	3.18519		0.847882	0.87178	0.136696	0.175771
42	0.583578	0.628141	0.507148	0.647737		2.16667	5	1.57407	2.68519		0.783316	0.55717	0.0890999	0.0153726
43	0.584906	0.661243	0.519988	0.647001		8.33333	9.33333	2.55556	5.07407		0.752057	0.630304	0.0707225	0.0425573
44	0.585376	0.522965	0.451913	0.686445		13	10.5	4.53704	2.53704		0.752812	0.545573	0.0823371	0.0105103
45	0.596774	0.126328	0.402273	0.712651		30.5	41	5.51852	2.96296		0.872969	0.730686	0.1417	0.05416
46	0.613316	0.636364	0.463652	0.720447		40.5	49.5	6.51852	2.07407		0.84066	0.821589	0.0868256	0.0906745
47	0.61559	0.618231	0.559707	0.667955		12.8333	2	5.35185	2.51852		0.565877	0.504366	0.0130313	0.00429966
48	0.633205	0.512605	0.537424	0.709507		17.8333	26.5	6.5	7.12963		0.543125	0.684045	0.00597681	0.0376548
49	0.661871	0.37236	0.547483	0.750993		9.16667	1.16667	1.16667	0.222222		0.763255	0.5125	0.111363	0.00646245
50	0.663189	0.691145	0.515952	0.76492		30.8333	1.83333	9.35185	0.462963		0.850738	0.53895	0.201326	0.0138658
51	0.678982	0.618705	0.51475	0.774237		53.5	5.66667	25.0741	2.35185		0.671458	0.506866	0.0826596	0.00168357
52	0.679844	0.523004	0.626642	0.733241		71.5	11.8333	30.2963	3.35185		0.889696	0.511814	0.22558	0.00146245
53	0.68028	0.851787	0.577826	0.760553		5.66667	6	0.12963	0		0.71342	0.626068	0.0671665	0.0163019
54	0.680637	0.651376	0.60608	0.746334		22.3333	20.1667	5.75926	12.1852		0.550043	0.56079	0.0211625	0.00677199
55	0.685243	0.532554	0.632634	0.735174		40.3333	22.5	4.57407	12.2593		0.564983	0.517292	0.00795269	0.00191171
56	0.696552	0.786671	0.641274	0.747543		0.833333	25.8333	2.27778	15.0556		0.728255	0.795382	0.0516483	0.0789901
57	0.71008	0.894553	0.672078	0.751795		9.33333	27.1667	2	13.6852		0.627812	0.504653	0.0378073	-0.00255131
58	0.716895	0.271523	0.671398	0.764365		16.3333	36	3.22222	15.2037		0.634852	0.59487	0.0178377	0.0163412
59	0.719261	0.516129	0.660715	0.773038		21.1667	0	0.222222	0.0185185		0.550417	0.532335	7.23501e-05	-0.00101629
60	0.721477	0.492683	0.626711	0.790205		13.6667	0	0.111111	0		0.87776	0.940668	0.159878	0.232286
61	0.736842	0.104982	0.680179	0.785028		27.8333	12.1667	2.83333	0.111111		0.553698	0.509488	0.00935636	0.00494075
62	0.739212	0.824758	0.678286	0.78971		21.8333	3.66667	4.01852	0.240741		0.899835	0.648976	0.197403	0.0233444
63	0.741935	0.781109	0.581039	0.841845		5.33333	0	0.388889	0		0.661146	0.653038	0.0343032	0.0892376
64	0.753974	0.679577	0.706732	0.796392		17.5	3.83333	0.666667	2.68519		0.783802	0.777378	0.0825619	0.0693566
65	0.757396	0.666667	0.67244	0.821936		21.3333	5.66667	0.407407	1.35185		0.608767	0.700356	0.0363052	0.0701196
66	0.757536	0.956522	0.691597	0.81439		0.666667	3.66667	0.666667	1.48148		0.812786	0.742665	0.100879	0.0860048
67	0.758548	0.708381	0.715782	0.800293		10.6667	2.5	0.203704	1.07407		0.618681	0.660738	0.0491169	0.0781925
68	0.765273	0.849752	0.713928	0.812894		8.16667	1.5	0.351852	0		0.850104	0.974583	0.140293	0.317003
69	0.777038	0.672922	0.724169	0.823339		5.33333	0.166667	0.518519	0.166667		0.59191	0.508785	0.018003	-0.0147164
70	0.777839	0.188679	0.676004	0.84649		58.8333	110.5	39.1852	91.3704		0.696458	0.904575	0.0277758	0.200586
71	0.786861	0.81374	0.709873	0.843945		85.8333	117.833	50.6296	98.5926		0.75079	0.750347	0.0571733	0.0708329
72	0.809524	0.148936	0.670355	0.90927		16.1667	2.16667	4.83333	0.777778		0.594097	0.843064	0.0211026	0.136195
73	0.82716	0.788337	0.745404	0.888112		9.83333	1.83333	7.5	0.703704		0.514141	0.519097	-0.00317348	-0.00154299
74	0.843003	0.924855	0.727643	0.918495		21.5	0	11.5926	0.0740741		0.632587	0.649965	0.0186837	0.0351561
75	0.85736	0.414013	0.784066	0.908343		28.5	0	7.16667	0.0185185		0.902188	0.922179	0.17313	0.201117
76	0.871681	0.881054	0.814015	0.918871		8	0.166667	0.555556	0.037037		0.939219	0.916554	0.215273	0.198439
77	0.877402	0.947622	0.838784	0.909454		14.5	3.16667	3.12963	0.722222		0.648325	0.749601	0.0388607	0.0848768
78	0.878866	0.818182	0.815143	0.925307		11.1667	1	1.77778	0.259259		0.725547	0.686927	0.0997664	0.0748325
79	0.886792	0.757685	0.809934	0.941573		4.33333	0	0.259259	0.0185185		0.671267	0.73138	0.0602585	0.0631156
80	0.888929	1	0.827807	0.936516		4.66667	0	0.537037	0		0.731111	0.760642	0.0592113	0.0813447
81	0.890244	0.817664	0.850296	0.924972		22.5	6.66667	0.981481	0.12963		0.766233	0.720521	0.118874	0.0866326
82	0.903432	0.92607	0.863096	0.939462		21.6667	2.5	1.25926	0.222222		0.893854	0.869618	0.210781	0.239369
83	0.914447	0.822785	0.867754	0.949692		25.5	26.3333	4.38889	9.03704		0.795477	0.703889	0.095772	0.0468018
84	0.923865	0.928571	0.877116	0.958469		22.5	27	4.75926	7.66667		0.765929	0.792786	0.0856367	0.0758295
85	0.946172	0.403557	0.897456	0.981124		34.1667	1.33333	11.0741	0		0.880946	0.903108	0.157174	0.165239
						29	0	9.16667	0.203704
						14.8333	0.333333	3.03704	0.444444
						45.3333	0.833333	4.48148	0.351852
						12.8333	0.333333	2.57407	0.0555556
						10.5	0.166667	3.01852	0.0555556
						14.8333	0	2.09259	0
						27.6667	0	3.48148	0
						7.83333	0.666667	3.03704	0.87037
						10.8333	0.833333	7.12963	0.314815
						17	0	11.1852	0.0185185
						14.6667	0.166667	11	0.037037
						6	0	5.11111	0.037037
						5.5	0	0.759259	0.0185185
						8.16667	0	1.72222	0
						18.6667	0	2.37037	0.0555556
						26.3333	18.1667	2.90741	1.42593
						14.3333	6	2.5	0.537037
						13.3333	0.166667	1.03704	0.555556
						34.3333	11.1667	17.7407	4.12963
						42.5	30	15.1296	2.53704
						16.6667	1.16667	3	0.851852
						21.3333	4.5	3.14815	1.07407
						21.6667	1.66667	9.42593	0.240741
						19.1667	3.16667	9.53704	0.185185
						10	0	1.53704	0.240741
						8.83333	9.5	3.16667	3.38889
						3.5	0.166667	1.53704	0.314815
						12.1667	1.5	1.98148	0.222222
						61.6667	30.6667	15.7778	8.68519
						54.6667	19.3333	16.8704	15.1667
						86.3333	32.1667	22.8333	9.22222
						93.5	87	28.0741	14.1852
						4.33333	5.16667	0.481481	4.2963
						2.83333	5	3.48148	3.59259
						5.16667	6.5	6.03704	2.22222
						8	12.3333	5.59259	4.05556
						15.1667	0	1.09259	0
						33.3333	0.333333	1.75926	0
						47.1667	0.666667	2.2037	0.0555556
						44	0.666667	1.87037	0.0740741
						6.83333	0.5	0.62963	0.240741
						5.83333	0	0.703704	0.12963
						18.8333	0.5	1.11111	0
						17.6667	0	0.333333	0.0185185
						0.666667	0.5	7.66667	0.148148
						26.1667	19.1667	14.7593	16.6296
						39.1667	24.8333	16.7593	16.4074
						8.83333	4.5	14.2037	5.11111
						22.1667	10.8333	13.3519	6.46296
						7	3.66667	2.72222	7.33333
						1.16667	10.8333	2.05556	5.92593
						1.5	4.33333	0.425926	5.64815
						9.66667	13	2.57407	4.2963
						6.16667	14.5	2.25926	4.44444
						12.1667	2	13.7593	1.25926
						28.3333	0.5	6.11111	1.22222
						3.16667	4	1.51852	2.01852
						3.16667	4.16667	0.685185	1.24074
						3.5	1.83333	1.2963	1.38889
						3.16667	3.33333	1.2037	1.2963
						66.3333	33.8333	10.5926	7.75926
						43	71.1667	8.96296	4.77778
						2	6.83333	1.77778	2.16667
						3.66667	0.833333	0.666667	1.07407
						1.66667	1	2.62963	0.814815
						16.5	0.166667	10.0185	0.0185185
						16.6667	2.16667	1.59259	1
						13.5	5.66667	3.33333	1.5
						2.33333	1.16667	1.11111	0.037037
						6	4	1.22222	0.0555556
						8.66667	6.5	3.2963	3.01852
						11.5	15.3333	3.03704	2.83333
						3.16667	6.5	0.314815	0.518519
						1.33333	4.5	0.351852	0.833333
						32.5	31.6667	9.09259	9.01852
						28.1667	17.8333	6.96296	5.01852
						2	4.16667	0.259259	0.12963
						3	2	0.166667	0.111111
						7.33333	22	3.42593	4.98148
						8.83333	16.5	1.46296	1.38889
						8.33333	16.6667	1.11111	1.7963
						5.83333	1.33333	1.74074	0.444444
						0.666667	1	0.592593	0.222222
						26.6667	6.33333	3.31481	3.5
						0.833333	2.5	3.62963	3.35185
						5	18.5	1.37037	1.66667
						8.33333	20.8333	1.16667	1.48148
						11	14.3333	7.37037	7.61111
						25.1667	18.1667	9.90741	7.90741
						1.66667	6.66667	0.888889	2.11111
						3.16667	11.6667	1.2037	2.12963
						4.83333	8.33333	1.11111	1.48148
						5.5	5.16667	3.09259	4.81481
						0.833333	3	1.57407	2.27778
						3.66667	4	2.31481	2.09259
						6.33333	6.16667	2.64815	2.55556
						22.1667	63.1667	3.61111	12.0926
						24.8333	69.3333	2.98148	13.1852
						21.8333	20.1667	3.01852	3.2037
						24.8333	21.1667	3.38889	3.85185
						7.33333	17.6667	1.7963	9.74074
						9.16667	64.3333	3.09259	12.4259
						9.66667	2.83333	1.38889	0.0555556
						10	2.66667	0.555556	0.296296
						7.83333	2.33333	0.685185	0.444444
						4.5	5.33333	0.481481	0.462963
						14.3333	20.3333	4.05556	4.7963
						21	14.6667	5.18519	6.16667
						5.16667	4.16667	2.61111	1.7963
						14.1667	13.6667	2.7963	2.14815
						13.6667	9.83333	1.66667	0.907407
						20.3333	12.1667	2.38889	1.35185
						25.6667	20	1.40741	0.425926
						12.3333	6.16667	1.07407	0.277778
						16.3333	7	3.05556	1.87037
						13	14.6667	2.51852	2.7037
						20.3333	28.1667	11.1852	10.7778
						33.8333	34.5	12.1296	13.7222
						36.1667	41.6667	8.57407	10.9259
						31	42.1667	7.40741	8.85185
