# Supplementary material for: Acetylcholine modulates the precision of prediction error in the auditory cortex
Source: eLife. 2024 Jan 19;12:RP91475. doi: 10.7554/eLife.91475 (PMC10942646; doi:10.7554/eLife.91475)
Supplement: Figure 6—source data 1. [file elife-91475-fig6-data1.xlsx]

## Sheet: Figure 6
	SI		Control SI 95% CI			SI decrease					SI increase
Unit order	Control	Effect	Lower bound	Higher bound		ROC AUC		Mutual Information			ROC AUC		Mutual Information
1	-0.84	0.542857	-1	-0.55186		Control	Effect	Control	Effect		Control	Effect	Control	Effect
2	-0.626556	-0.14557	-1	-0.0575888		0.535833	0.578576	-0.00954674	0.00440912		0.631771	0.687396	0.0458647	0.0714162
3	-0.464286	0.263587	-1	0.111111		0.710799	0.646806	0.113833	0.0182518		0.82875	0.846146	0.14878	0.2051
4	-0.307692	0.136842	-1	0.218392		0.822396	0.557604	0.144221	-0.00237339		0.86691	0.691528	0.201411	0.0999086
5	-0.275862	0.292818	-0.696154	0.0847286		0.902639	0.547847	0.186824	-0.00111835		0.58566	0.757569	0.0130743	0.0640753
6	-0.233119	-0.0635838	-0.562299	0.0216604		0.899306	0.50125	0.19229	0.0262273		0.500035	0.77309	-0.00999432	0.0898913
7	-0.224138	0.102041	-0.647296	0.0975396		0.725556	0.509514	0.0654759	-0.00984792		0.516042	0.852396	-0.00557872	0.130224
8	-0.102639	0.163793	-0.484753	0.171165		0.813542	0.563264	0.117921	-0.00618537		0.733576	0.877951	0.0911405	0.175597
9	-0.077686	0.490446	-0.444316	0.191637		0.741285	0.647188	0.100326	0.0375231		0.582014	0.628854	-0.020575	0.016272
10	-0.0769231	-0.532468	-0.84937	0.374172		0.947812	0.930799	0.272147	0.261327		0.918924	0.978542	0.17161	0.337215
11	-0.0614286	0.227273	-0.494218	0.253171		0.830694	0.748472	0.151381	0.0822661		0.958854	0.998576	0.249361	0.441422
12	-0.0322581	0.495385	-0.443657	0.248173		0.925521	0.863958	0.220691	0.158902		0.892465	0.899549	0.154066	0.180745
13	0	0.42446	-0.686743	0.411765		0.915104	0.889687	0.231345	0.140231		0.836007	0.80441	0.111562	0.120899
14	0.0588235	0.518519	-0.442676	0.372144		0.664618	0.515486	0.0366186	0.021065		0.855139	0.8125	0.232624	0.244231
15	0.0588235	0.636364	-1	0.545622		0.752847	0.512951	0.0799688	0.00764043		0.539514	0.652396	0.0214165	0.0256086
16	0.0756972	-0.844828	-0.222249	0.295088		0.859965	0.695556	0.149713	0.0484742		0.931285	0.871076	0.276548	0.268574
17	0.08	-1	-0.168309	0.304303		0.91191	0.715278	0.227874	0.0489456		0.840174	0.702014	0.185755	0.101913
18	0.111111	0.623853	-0.653846	0.522102		0.67059	0.68	0.0574003	0.0161438		0.514306	0.575625	0.00829572	-0.00984089
19	0.134615	0.445255	-0.120225	0.323992		0.749687	0.792569	0.0799063	0.0845203		0.835	0.6	0.20094	0.0685911
20	0.142857	0.636364	0.0674629	0.214055		0.998194	0.501389	0.435621	0		0.570694	0.576562	-0.037507	0.011648
21	0.158416	0.301205	-0.414595	0.484986		0.950868	0.565764	0.317132	0.00980768		0.880174	0.69566	0.188449	0.117506
22	0.161818	0.235294	-0.225147	0.404224		0.99184	0.681736	0.438707	0.0145503		0.897569	0.575	0.153037	0.0450178
23	0.177112	0.505085	-0.161196	0.409747		0.855243	0.555799	0.241697	0.013071		0.716285	0.521215	0.10036	0.0146145
24	0.197581	0.306329	0.0576605	0.322475		0.723854	0.505417	0.0856648	-6.76175e-05		0.625174	0.509722	0.0196899	-0.00045442
25	0.200453	0.0947619	0.113501	0.279837		0.713056	0.670451	0.0974955	0.0321402		0.967431	0.970556	0.239604	0.324558
26	0.206186	0.451613	-0.00776867	0.392722		0.767604	0.589861	0.148787	0.0391295		0.874792	0.744514	0.165557	0.114144
27	0.206307	-1	0.13175	0.272667		0.734375	0.505556	0.0373218	-6.245e-15		0.785104	0.779792	0.0835261	0.128477
28	0.226006	0.31307	-0.137064	0.48026		0.872917	0.501389	0.166885	0		0.902188	0.950035	0.216843	0.267727
29	0.244413	0.8	0.136236	0.337441		0.715972	0.509722	0.158821	-0.00881454		0.783854	0.598021	0.0801237	0.0395652
30	0.248175	0.252677	-0.0111225	0.433103		0.667188	0.501389	0.0749533	0		0.720417	0.662847	0.00781916	0.0900029
31	0.257973	0.0889022	0.194525	0.317192		0.881181	0.831076	0.191326	0.115237		0.873507	0.941389	0.142958	0.183002
32	0.261993	0.583799	-0.0434783	0.470543		0.866458	0.866493	0.159483	0.144828		0.500451	0.622049	-0.0127053	0.0234186
33	0.272438	0.849624	-0.0125885	0.448611		0.87684	0.513889	0.150398	0.00436862		0.586562	0.752153	0.0293001	0.0703638
34	0.278733	0.0708743	0.11811	0.392594		0.664861	0.505139	0.0632778	0.000781831		0.902639	0.525	0.260204	0.0215048
35	0.280172	0.0352505	-0.188704	0.518453		0.839896	0.54375	0.13452	0.000919913		0.83934	0.525	0.169478	0.0160696
36	0.290247	0.446505	0.170022	0.395777		0.568333	0.519132	-0.00679204	-0.00228752		0.680729	0.515451	0.052676	-0.00320397
37	0.299384	-1	0.175737	0.40647		0.681806	0.501389	-0.0110448	0		0.526007	0.602917	-0.00413443	0.00905102
38	0.304348	0.518987	-0.104455	0.567844		0.647951	0.502778	0.0723516	0.00543527		0.827604	0.976562	0.0707481	0.287414
39	0.305344	0.491124	-0.148289	0.598684		0.599132	0.501389	0.0561303	0		0.512778	0.728472	-0.0136821	0.0723145
40	0.318634	0.460048	0.240398	0.391363		0.806285	0.504167	0.130869	0		0.517465	0.52	-0.00802834	0.000400882
41	0.318681	0.554656	-0.0575658	0.542857		0.711319	0.520972	0.0792864	0.00393919		0.681215	0.511111	0.0362481	0
42	0.328571	0.397516	0.0935401	0.504244		0.746424	0.501389	0.0553656	-0.00100464		0.568819	0.584722	-0.0130171	0.0470623
43	0.335484	0.889503	0.212398	0.427909		0.818333	0.614444	0.117609	0.00341987		0.753194	0.721458	0.0594431	0.140585
44	0.351779	0.329231	0.0982234	0.524927		0.630243	0.505556	0.0558396	0		0.829722	0.894028	0.112952	0.182473
45	0.354839	0.938462	0.0243902	0.568495		0.622049	0.509757	0.0271491	-0.00565315		0.596458	0.716736	0.0206294	0.122023
46	0.361772	0.413395	0.286505	0.431015		0.856319	0.638194	0.118338	0.0974022		0.693472	0.939097	0.0325717	0.213408
47	0.363167	0.630748	0.198826	0.495738		0.630069	0.522604	0.0447627	0.0178523		0.835069	0.977708	0.134556	0.302537
48	0.364303	0.373494	0.0430806	0.568078		0.822431	0.532083	0.162287	0.0117797		0.518507	0.552292	0.0105427	0.00781261
49	0.389706	-0.307692	0.0640394	0.617402		0.684688	0.522014	0.0828774	0.00118595		0.626181	0.912049	-0.00570516	0.249249
50	0.393687	0.747573	0.29719	0.473832		0.658229	0.508333	0.0917569	0.00286156		0.767604	0.896493	0.119693	0.195552
51	0.400662	0.204311	0.287433	0.492281		0.941875	0.501389	0.328464	0		0.559236	0.85191	0.0136618	0.139441
52	0.404766	0.558537	0.337754	0.468319		0.670069	0.565035	0.042127	-0.0147857		0.702708	0.886354	0.0733698	0.181954
53	0.410138	0.379562	0.0034965	0.658845		0.759757	0.681944	0.0365161	0.0740967		0.700625	0.65875	0.0353713	0.0910458
54	0.410309	0.414013	0.249679	0.556192		0.653611	0.564861	0.0262539	0.000220217		0.949931	0.956354	0.275099	0.33155
55	0.411405	-0.114754	0.305156	0.498022		0.581632	0.601007	0.0185669	0.0341505		0.841424	0.785764	0.180609	0.147436
56	0.422925	0.659068	-0.0627451	0.674419		0.773854	0.518472	0.0956177	-0.00791205		0.71625	0.788403	0.0756629	0.104595
57	0.435058	0.393466	0.368059	0.501945		0.931562	0.886701	0.212656	0.302459
58	0.438356	-0.13369	0.222941	0.590245		0.625972	0.500868	0.0325348	0.000678639
59	0.44	-0.333333	0.224616	0.593674		0.888194	0.572812	0.223351	0.0142708
60	0.441227	-0.13253	-0.102067	0.6881		0.731319	0.530278	0.0797753	-0.00605952
61	0.447423	0.542299	0.250364	0.592058		0.945694	0.935382	0.212585	0.199015
62	0.448916	0.365759	0.299731	0.567961		0.953785	0.914514	0.261519	0.20206
63	0.449153	0.44	-0.0951679	0.732919		0.706632	0.621319	0.0953691	0.0439216
64	0.449153	0.691275	0.0502459	0.659625		0.810764	0.63625	0.168437	0.035814
65	0.459459	0.137931	-0.348986	0.740716		0.6925	0.677813	0.0478933	0.0362043
66	0.463736	0.530792	0.295531	0.58262
67	0.465487	0.444816	0.271523	0.599079
68	0.465753	0.575991	0.410476	0.524428
69	0.4722	0.430876	0.382797	0.554028
70	0.472222	0.474138	0.406035	0.528806
71	0.472393	0.685393	0.313437	0.609977
72	0.474936	0.844052	0.420285	0.530767
73	0.482577	0.610795	0.273096	0.624327
74	0.482702	0.419786	0.278164	0.620425
75	0.487603	0.586441	0.0588235	0.697541
76	0.495468	0.676236	0.259808	0.666027
77	0.510438	1	0.445162	0.569039
78	0.519651	-1	0.446938	0.579884
79	0.528346	0.120773	0.455059	0.601132
80	0.530612	0.29563	0.190339	0.718246
81	0.534562	0.596774	0.454677	0.602011
82	0.538157	0.719619	0.467633	0.607707
83	0.539683	0.471698	0.387143	0.641555
84	0.540342	0.5	-0.000529414	0.763488
85	0.553425	0.5	0.349663	0.708668
86	0.557692	-0.131725	0.2	0.741935
87	0.558912	0.618276	0.356821	0.70048
88	0.562778	0.556668	0.459459	0.649466
89	0.569767	0.834711	0.303308	0.721048
90	0.578947	-1	-1	0.905882
91	0.579425	0.503212	0.463164	0.677865
92	0.581679	0.554362	0.479061	0.66281
93	0.582166	0.688073	0.479814	0.666312
94	0.582418	0.6875	0.210169	0.782178
95	0.585268	0.460621	0.361859	0.722141
96	0.58998	0.246709	0.483435	0.684002
97	0.592539	0.558588	0.520514	0.652931
98	0.598131	-1	0.518952	0.668069
99	0.603585	0.560778	0.488176	0.691877
100	0.60396	0.581395	0.513314	0.6875
101	0.60396	0.408	0.454793	0.717443
102	0.606491	0.289189	0.188145	0.787063
103	0.614272	0.652995	0.533366	0.687525
104	0.616722	0.584507	0.543159	0.685527
105	0.618529	0.602374	0.434783	0.740031
106	0.622951	0.580838	0.218278	0.830508
107	0.626168	0.698113	0.374274	0.770884
108	0.634241	0.592138	0.517362	0.730958
109	0.634356	0.627232	0.57282	0.694363
110	0.638767	0.637234	0.567451	0.706319
111	0.644231	0.541096	0.46098	0.774648
112	0.644958	0.628571	0.392109	0.777481
113	0.645161	-0.419355	0.449632	0.788992
114	0.647059	0.330009	0.434654	0.790018
115	0.650815	0.557692	0.567351	0.73184
116	0.651685	NaN	0.377069	0.8027
117	0.655025	0.874177	0.553925	0.736174
118	0.660104	-0.142857	0.376919	0.815966
119	0.661538	0.972603	0.52802	0.747017
120	0.665865	0.714286	0.439413	0.8
121	0.670306	0.728337	0.560347	0.75319
122	0.670455	0.406148	0.534581	0.777118
123	0.675418	0.688699	0.540868	0.7737
124	0.684814	0.578288	0.568671	0.777792
125	0.689112	0.876777	0.561604	0.781364
126	0.692308	-0.126214	0.459459	0.81454
127	0.693573	0.865206	0.629512	0.753842
128	0.694915	0.155963	0.532668	0.794189
129	0.70297	0.835694	0.593409	0.796031
130	0.705824	0.0123023	0.639871	0.765165
131	0.70632	0.489005	0.630349	0.77136
132	0.707083	0.91716	0.56167	0.819151
133	0.715827	0.84472	0.629626	0.790954
134	0.719828	0.678642	0.633676	0.791415
135	0.719895	0.741935	0.627587	0.793605
136	0.722725	0.919569	0.674754	0.771819
137	0.724603	0.626892	0.66371	0.780696
138	0.725322	0.588235	0.538113	0.839144
139	0.733547	-1	0.393183	0.888853
140	0.742814	0.614618	0.637682	0.822779
141	0.748744	0.961538	0.568112	0.861168
142	0.752735	NaN	0.643216	0.827208
143	0.754386	0.86722	0.648685	0.833164
144	0.754513	0.642893	0.671505	0.822554
145	0.754875	0.924752	0.651486	0.831124
146	0.757079	0.725832	0.690425	0.816774
147	0.757396	-1	0.355672	0.924904
148	0.759843	0.69208	0.703041	0.815078
149	0.762238	0.740095	0.627528	0.848765
150	0.763514	-0.244755	0.629775	0.852592
151	0.764706	0.805416	0.685008	0.828405
152	0.770492	0.939655	0.5	0.903465
153	0.774194	0.68	0.626506	0.869507
154	0.774648	-1	0.667896	0.854588
155	0.776457	NaN	0.72002	0.833679
156	0.778876	0.288136	0.646824	0.856812
157	0.782609	0.831034	0.65026	0.86664
158	0.784703	-1	0.525963	0.93301
159	0.785619	0.680431	0.728968	0.839903
160	0.789731	0.8	0.695106	0.859502
161	0.793594	NaN	0.648185	0.901438
162	0.796289	0.294619	0.741087	0.843437
163	0.797885	0.00126422	0.721333	0.861678
164	0.8	0.0919765	0.563221	0.905496
165	0.80114	0.854442	0.753204	0.851403
166	0.803239	0.717456	0.730439	0.862752
167	0.803838	0.2	0.725194	0.865168
168	0.806691	0.840256	0.64611	0.897677
169	0.815217	0.9819	0.742294	0.883044
170	0.819149	0.852243	0.655172	0.909529
171	0.820074	0.40625	0.715608	0.886683
172	0.820555	0.251656	0.742509	0.876904
173	0.822785	8.32667e-17	0.685855	0.907131
174	0.825558	0.368421	0.770492	0.871246
175	0.831266	0.35	0.634182	0.942276
176	0.831703	0.661538	0.758399	0.896401
177	0.83542	0.531034	0.707623	0.924499
178	0.83913	0.68	0.744433	0.914536
179	0.839779	0.913793	0.747338	0.90706
180	0.85567	-0.538462	0.711594	0.93535
181	0.864078	NaN	0.674419	0.950232
182	0.864865	0.696721	0.730769	0.951428
183	0.865604	NaN	0.70624	0.952405
184	0.87013	0.636364	0.684702	0.981063
185	0.884527	0.897172	0.836884	0.92501
186	0.887097	-1	0.70114	0.981651
187	0.888579	1	0.808147	0.945006
188	0.890145	0.836735	0.830397	0.941108
189	0.894737	0.8	0.825263	0.945362
190	0.894737	0.894737	0.753049	0.967412
191	0.896033	0.958296	0.853504	0.930078
192	0.899736	1	0.840226	0.948131
193	0.905882	0.805825	0.8	0.962351
194	0.908761	0.863436	0.869712	0.945725
195	0.910728	0.846154	0.841079	0.958144
196	0.916404	0.961853	0.861045	0.957443
197	0.917391	1	0.862069	0.959171
198	0.91845	0.8	0.863439	0.961174
199	0.926606	0.176136	0.855869	0.976628
200	0.955272	1	0.903143	0.992739
201	0.962521	0.614776	0.93097	0.987633
202	0.962521	0.398964	0.937193	0.983051
203	0.962963	-1	0.927936	0.98864
204	0.979221	-1	0.960931	0.992998
205	0.983871	NaN	0.966581	0.997243
