# Supplementary material for: Acetylcholine modulates the precision of prediction error in the auditory cortex
Source: eLife. 2024 Jan 19;12:RP91475. doi: 10.7554/eLife.91475 (PMC10942646; doi:10.7554/eLife.91475)
Supplement: Figure 7—source data 1. [file elife-91475-fig7-data1.xlsx]

## Sheet: Figure 7
SI decrease							SI increase							SI decrease							SI increase
CAS		DEV		STD			CAS		DEV		STD			iMM		iPE		iRS			iMM		iPE		iRS
Control	Effect	Control	Effect	Control	Effect		Control	Effect	Control	Effect	Control	Effect		Control	Effect	Control	Effect	Control	Effect		Control	Effect	Control	Effect	Control	Effect
0.737111	0.915803	0.623709	0.249765	0.260104	0.314518		0.647468	0.680412	0.749916	0.730923	0.135686	0.0528219		0.363605	-0.0647538	-0.113402	-0.666039	0.477007	0.601285		0.61423	0.678101	0.102448	0.050511	0.511782	0.62759
0.67031	0.506293	0.718573	0.73809	0.185304	0.445972		0.656137	0.534514	0.745053	0.844419	0.119917	0.0353816		0.533269	0.292118	0.0482623	0.231797	0.485007	0.0603214		0.625136	0.809037	0.0889158	0.309904	0.53622	0.499133
0.544242	0.581893	0.833585	0.714142	0.0945342	0.389104		0.663512	0.499751	0.702929	0.836426	0.256208	0.225034		0.739051	0.325037	0.289344	0.132248	0.449707	0.192789		0.446721	0.611392	0.0394166	0.336675	0.407305	0.274717
0.562858	0.750078	0.808206	0.590641	0.173187	0.297535		0.557638	0.560932	0.764303	0.796524	0.323854	0.225619		0.635019	0.293106	0.245348	-0.159437	0.389671	0.452543		0.440449	0.570905	0.206665	0.235592	0.233784	0.335313
0.792952	0.682583	0.597764	0.673232	0.117926	0.284323		0.526665	0.572692	0.845702	0.819736	0.0860895	0.00748618		0.479837	0.388909	-0.195188	-0.00935045	0.675025	0.39826		0.759613	0.81225	0.319037	0.247044	0.440576	0.565206
0.7496	0.875988	0.661412	0.395053	0.0251966	0.276728		0.568309	0.689698	0.809223	0.722541	0.148941	0.0474396		0.636215	0.118325	-0.0881882	-0.480934	0.724403	0.59926		0.660282	0.675102	0.240914	0.0328428	0.419368	0.642259
0.534668	0.675251	0.844908	0.717454	0.0161354	0.171157		0.99738	0.206194	0.0511477	0.907255	0.0511477	0.366568		0.828773	0.546297	0.31024	0.0422032	0.518533	0.504094		0	0.540687	-0.946233	0.701061	0.946233	-0.160373
0.707042	0.676575	0.707042	0.676575	0.0135025	0.290677		0.720784	0.485643	0.692518	0.874157	0.0298364	0		0.69354	0.385898	0	-1.11022e-16	0.69354	0.385898		0.662681	0.874157	-0.028266	0.388514	0.690947	0.485643
0.445532	0.57735	0.891065	0.57735	0.0866313	0.57735		0.595474	0.321467	0.638781	0.884034	0.487206	0.339326		0.804433	1.11022e-16	0.445532	0	0.358901	1.11022e-16		0.151575	0.544708	0.0433072	0.562567	0.108268	-0.0178593
0.65839	0.297422	0.626447	0.735786	0.417237	0.608407		0.388658	0.37133	0.920507	0.928325	0.0401538	0.0180508		0.20921	0.127378	-0.0319435	0.438364	0.241153	-0.310986		0.880353	0.910275	0.531848	0.556995	0.348505	0.353279
0.644502	0.419493	0.658569	0.696201	0.388463	0.58252		0.6056	0.124035	0.757	0.992278	0.245358	0		0.270106	0.113681	0.0140665	0.276708	0.256039	-0.163027		0.511641	0.992278	0.1514	0.868243	0.360242	0.124035
0.567486	0.665649	0.811452	0.705856	0.139662	0.242235		0.29473	0	0.798226	0.935472	0.525328	0.353401		0.67179	0.463622	0.243966	0.040207	0.427824	0.423415		0.272898	0.582072	0.503496	0.935472	-0.230599	-0.353401
0.510862	0.633828	0.841053	0.744059	0.177902	0.211276		0.65362	0	0.605458	0.976187	0.454094	0.21693		0.663152	0.532783	0.330191	0.110231	0.33296	0.422552		0.151365	0.759257	-0.0481615	0.976187	0.199526	-0.21693
0.69008	0	0.69008	0	0.218129	1		0.707196	0.678553	0.702748	0.732299	0.0775889	0.0574792		0.471951	-1	1.11022e-16	0	0.471951	-1		0.625159	0.67482	-0.00444777	0.0537467	0.629607	0.621074
0.402972	0.948683	0.896612	0.189737	0.183576	0.252982		0.834091	0.954728	0.543423	0.296295	0.0947831	0.0265202		0.713036	-0.0632456	0.49364	-0.758947	0.219396	0.695701		0.44864	0.269775	-0.290668	-0.658433	0.739308	0.928208
0.382062	0.911141	0.919654	0.379642	0.0909135	0.160293		0.694787	0.643159	0.638956	0.718194	0.330162	0.265601		0.82874	0.219349	0.537592	-0.531499	0.291149	0.750848		0.308794	0.452593	-0.0558311	0.0750352	0.364625	0.377558
0.535941	0.290891	0.787164	0.581781	0.305189	0.759548		0.768404	0.429851	0.602902	0.899688	0.214628	0.0760848		0.481975	-0.177767	0.251222	0.290891	0.230752	-0.468657		0.388274	0.823604	-0.165502	0.469837	0.553776	0.353766
0.633624	0	0.646296	0	0.425232	1		0.633261	0.882922	0.709688	0.464696	0.308745	0.0671228		0.221064	-1	0.0126725	0	0.208392	-1		0.400944	0.397573	0.076428	-0.418226	0.324516	0.8158
0.462481	0.569178	0.872606	0.664041	0.157069	0.484856		0.621866	0.724412	0.701123	0.688191	0.348868	0.0402451		0.715537	0.179186	0.410125	0.0948631	0.305412	0.0843227		0.352255	0.647946	0.0792574	-0.0362206	0.272998	0.684167
0.57949	0.697246	0.806248	0.697246	0.118978	0.166421		0.50091	0.574267	0.828939	0.807998	0.248895	0.131743		0.68727	0.530825	0.226757	0	0.460513	0.530825		0.580044	0.676256	0.328029	0.233731	0.252015	0.442524
0.521008	0.881993	0.781512	0.220498	0.343204	0.416497		0.545115	0.235782	0.545115	0.919551	0.636945	0.314376		0.438309	-0.195998	0.260504	-0.661495	0.177804	0.465496		-0.0918295	0.605175	0	0.683769	-0.0918295	-0.0785941
0.253617	0.568945	0.924292	0.647036	0.285241	0.507588		0.762397	0.483265	0.530363	0.831665	0.370763	0.273475		0.639052	0.139447	0.670676	0.0780905	-0.0316238	0.0613568		0.1596	0.558189	-0.232034	0.3484	0.391634	0.209789
0.74253	0.147198	0.665716	0.760523	0.0739685	0.632406		0.269282	0.988372	0.961723	0.152057	0.0507576	0		0.591748	0.128117	-0.0768134	0.613325	0.668561	-0.485208		0.910965	0.152057	0.69244	-0.836315	0.218525	0.988372
0.37834	0.597644	0.924831	0.796858	0.0393131	0.0885398		0.856695	0	0.514928	1	0.0303792	0		0.885518	0.708318	0.546491	0.199215	0.339027	0.509104		0.484549	1	-0.341767	1	0.826316	0
0.279807	0.287641	0.956007	0.862924	0.0880873	0.415482		0.535837	0.406875	0.416762	0.801419	0.734295	0.438383		0.867919	0.447442	0.6762	0.575282	0.191719	-0.127841		-0.317533	0.363036	-0.119075	0.394545	-0.198458	-0.0315088
0.272891	0	0.95512	0	0.115221	1		0.50938	0.751171	0.842436	0.658625	0.175598	0.0442168		0.839899	-1	0.682229	0	0.157671	-1		0.666837	0.614408	0.333056	-0.0925468	0.333782	0.706955
0.534225	0.993884	0.845192	0	0.015947	0.110432		0.258565	0.790814	0.51713	0.474488	0.815917	0.38662		0.829245	-0.110432	0.310967	-0.993884	0.518278	0.883452		-0.298786	0.0878682	0.258565	-0.316325	-0.557352	0.404194
0.450671	0.640552	0.777532	0.580027	0.438565	0.503251		0.804459	0.495951	0.536306	0.867914	0.255384	0.0275528		0.338966	0.0767766	0.326861	-0.0605246	0.0121059	0.137301		0.280922	0.840361	-0.268153	0.371963	0.549075	0.468398
0.631172	0.707929	0.713103	0.589281	0.305134	0.389339		0.478122	0.351094	0.860619	0.93625	0.175311	0.0130035		0.407969	0.199943	0.081931	-0.118647	0.326038	0.31859		0.685308	0.923247	0.382497	0.585156	0.30281	0.33809
0.578975	0.579721	0.759905	0.364396	0.295519	0.728793		0.776694	0.513589	0.608999	0.843753	0.160831	0.155911		0.464387	-0.364396	0.18093	-0.215325	0.283457	-0.149071		0.448168	0.687842	-0.167695	0.330164	0.615864	0.357678
0.564714	0.750579	0.806735	0.250193	0.174002	0.611583		0	0.119088	0.991703	0.992403	0.128554	0.0308748		0.632733	-0.36139	0.24202	-0.500386	0.390713	0.138996		0.863148	0.961529	0.991703	0.873315	-0.128554	0.0882136
0.449833	0.87143	0.881939	0.478109	0.140834	0.109648		0.567217	0.463723	0.8125	0.882858	0.134565	0.0743146		0.741104	0.36846	0.432106	-0.393321	0.308999	0.761781		0.677935	0.808543	0.245283	0.419135	0.432652	0.389409
0	0.740971	0.98387	0.41165	0.178885	0.530572		0.669021	0.374402	0.716809	0.923526	0.196459	0.0832005		0.804984	-0.118921	0.98387	-0.32932	-0.178885	0.210399		0.52035	0.840326	0.0477872	0.549124	0.472563	0.291202
0.549099	0.32969	0.831968	0.857195	0.0794991	0.395628		0.175495	0.28317	0.974972	0.956654	0.136496	0.0680287		0.752469	0.461566	0.282869	0.527504	0.4696	-0.065938		0.838476	0.888625	0.799477	0.673484	0.0389989	0.215141
0.177025	0.286842	0.976689	0.838462	0.121408	0.463361		0.618522	0.696144	0.734494	0.706233	0.279194	0.128916		0.855282	0.375101	0.799664	0.55162	0.055617	-0.176518		0.455301	0.577317	0.115973	0.010089	0.339328	0.567228
0.263547	0.584446	0.957768	0.797146	0.114989	0.151594		0.459137	0.640632	0.841752	0.753914	0.283985	0.145618		0.842779	0.645552	0.694221	0.2127	0.148558	0.432852		0.557767	0.608296	0.382614	0.113282	0.175152	0.495014
0.636187	0.725304	0.76445	0.677306	0.104321	0.123254		0.383273	0.30183	0.92225	0.953146	0.0505707	0.0202985		0.660129	0.554051	0.128263	-0.047998	0.531866	0.602049		0.871679	0.932847	0.538977	0.651316	0.332702	0.281531
0.496698	0.839284	0.864622	0.53409	0.0756289	0.101731		0.159483	0.133785	0.983478	0.990007	0.0856483	0.0445949		0.788993	0.432359	0.367924	-0.305194	0.421069	0.737553		0.89783	0.945412	0.823995	0.856222	0.0738347	0.0891898
0.49532	0.651594	0.843382	0.699272	0.208243	0.294012		0.630146	0.382893	0.680335	0.862787	0.374246	0.330139		0.63514	0.40526	0.348062	0.0476776	0.287077	0.357582		0.306089	0.532647	0.0501886	0.479893	0.2559	0.0527542
