# Supplementary material for: Acetylcholine modulates the precision of prediction error in the auditory cortex
Source: eLife. 2024 Jan 19;12:RP91475. doi: 10.7554/eLife.91475 (PMC10942646; doi:10.7554/eLife.91475)
Supplement: Figure 9—source data 1. [file elife-91475-fig9-data1.xlsx]

## Sheet: Figure 9
Rostro-caudal (mm)	Dorso-ventral (mm)	CSI Control	CSI effect		Rostro-caudal (mm)	Dorso-ventral (mm)	Deviant FR Control	Deviant FR effect		Rostro-caudal (mm)	Dorso-ventral (mm)	Standard FR Control	Standard FR effect
3.4	4.25	0.71008	0.894553		3.4	4.25	30.5	41		3.4	4.25	5.51852	2.96296
4.95	3.65	0.442509	0.494175		3.4	4.25	40.5	49.5		3.4	4.25	6.51852	2.07407
4.8	4.65	0.583578	0.628141		4.95	3.65	12.8333	2		4.95	3.65	5.35185	2.51852
4.5	4.62	0.386037	0.50838		4.95	3.65	17.8333	26.5		4.95	3.65	6.5	7.12963
4.05	5.15	0.716895	0.271523		4.8	4.65	9.16667	1.16667		4.8	4.65	1.16667	0.222222
5.8	3.25	0.661871	0.37236		4.8	4.65	30.8333	1.83333		4.8	4.65	9.35185	0.462963
4.35	5.2	0.757536	0.956522		4.5	4.62	53.5	5.66667		4.5	4.62	25.0741	2.35185
5.35	4.2	0.946172	0.403557		4.5	4.62	71.5	11.8333		4.5	4.62	30.2963	3.35185
4.05	4.25	0.85736	0.414013		4.05	5.15	22.3333	20.1667		4.05	5.15	5.75926	12.1852
3.9	5.2	0.878866	0.818182		4.05	5.15	40.3333	22.5		4.05	5.15	4.57407	12.2593
4.52	5.45	0.356522	0.459459		5.8	3.25	9.33333	27.1667		5.8	3.25	2	13.6852
3.7	3.55	0.678982	0.618705		5.8	3.25	16.3333	36		5.8	3.25	3.22222	15.2037
4.25	5.25	0.903432	0.92607		4.35	5.2	27.8333	12.1667		4.35	5.2	2.83333	0.111111
4.25	5.25	0.679844	0.523004		4.35	5.2	21.8333	3.66667		4.35	5.2	4.01852	0.240741
4.25	5.25	0.514654	0.73494		5.35	4.2	17.5	3.83333		5.35	4.2	0.666667	2.68519
4.6	5.15	0.777839	0.188679		5.35	4.2	21.3333	5.66667		5.35	4.2	0.407407	1.35185
4.6	5.15	0.613316	0.636364		4.05	4.25	0.666667	3.66667		4.05	4.25	0.666667	1.48148
5.05	4.15	0.294798	0.117241		4.05	4.25	10.6667	2.5		4.05	4.25	0.203704	1.07407
4.5	3.65	0.176066	0.5		3.9	5.2	8.16667	1.5		3.9	5.2	0.351852	0
2.7	4.35	0.765273	0.849752		3.9	5.2	5.33333	0.166667		3.9	5.2	0.518519	0.166667
2.95	4.4	0.400743	0.721254		4.52	5.45	16.1667	2.16667		4.52	5.45	4.83333	0.777778
2.65	4.15	0.721477	0.492683		4.52	5.45	9.83333	1.83333		4.52	5.45	7.5	0.703704
2.4	4.15	0.365748	0.838028		3.7	3.55	14.5	3.16667		3.7	3.55	3.12963	0.722222
4	3.9	0.633205	0.512605		3.7	3.55	11.1667	1		3.7	3.55	1.77778	0.259259
4.85	4.5	0.561715	0.354062		4.25	5.25	22.5	6.66667		4.25	5.25	0.981481	0.12963
4.85	4.5	0.558748	0.671646		4.25	5.25	21.6667	2.5		4.25	5.25	1.25926	0.222222
5.25	2.8	0.287854	0.126154		4.25	5.25	25.5	26.3333		4.25	5.25	4.38889	9.03704
5.25	2.8	0.0619866	0.5		4.25	5.25	22.5	27		4.25	5.25	4.75926	7.66667
3.75	4.9	0.888929	1		4.25	5.25	34.1667	1.33333		4.25	5.25	11.0741	0
3.75	4.9	0.914447	0.822785		4.25	5.25	29	0		4.25	5.25	9.16667	0.203704
3.45	3.25	0.809524	0.148936		4.6	5.15	14.8333	0.333333		4.6	5.15	3.03704	0.444444
3.45	3.25	0.923865	0.928571		4.6	5.15	45.3333	0.833333		4.6	5.15	4.48148	0.351852
3.15	3.9	0.34914	0.142308		4.6	5.15	12.8333	0.333333		4.6	5.15	2.57407	0.0555556
2.7	4.65	0.0588235	0.139711		4.6	5.15	10.5	0.166667		4.6	5.15	3.01852	0.0555556
5	4.55	0.261803	0.0446965		5.05	4.15	7.83333	0.666667		5.05	4.15	3.03704	0.87037
4.1	5	0.532258	0.517629		5.05	4.15	10.8333	0.833333		5.05	4.15	7.12963	0.314815
5.05	3.15	0.341718	0.00371747		4.5	3.65	17	0		4.5	3.65	11.1852	0.0185185
4.9	3.35	0.483731	0.429498		4.5	3.65	14.6667	0.166667		4.5	3.65	11	0.037037
4.6	3.1	0.454545	0.316038		2.7	4.35	26.3333	18.1667		2.7	4.35	2.90741	1.42593
5.1	3.6	0.696552	0.786671		2.7	4.35	14.3333	6		2.7	4.35	2.5	0.537037
4.62	4.35	0.236052	-0.0149254		2.95	4.4	34.3333	11.1667		2.95	4.4	17.7407	4.12963
3.4	4.45	0.719261	0.516129		2.95	4.4	42.5	30		2.95	4.4	15.1296	2.53704
3.4	4.45	0.5625	0.964789		2.65	4.15	16.6667	1.16667		2.65	4.15	3	0.851852
3.4	4.45	0.522013	0.577258		2.65	4.15	21.3333	4.5		2.65	4.15	3.14815	1.07407
4	5.35	0.741935	0.781109		2.4	4.15	21.6667	1.66667		2.4	4.15	9.42593	0.240741
4	5.35	0.581463	0.558146		2.4	4.15	19.1667	3.16667		2.4	4.15	9.53704	0.185185
4.25	5.6	0.843003	0.924855		4	3.9	3.5	0.166667		4	3.9	1.53704	0.314815
4.25	5.05	0.739212	0.824758		4	3.9	12.1667	1.5		4	3.9	1.98148	0.222222
4.8	4.15	0.596774	0.126328		4.85	4.5	61.6667	30.6667		4.85	4.5	15.7778	8.68519
4.2	3.8	0.68028	0.851787		4.85	4.5	54.6667	19.3333		4.85	4.5	16.8704	15.1667
4.2	3.8	0.35343	0.353644		4.85	4.5	86.3333	32.1667		4.85	4.5	22.8333	9.22222
4.3	3.95	0.551167	0.694118		4.85	4.5	93.5	87		4.85	4.5	28.0741	14.1852
4.9	4.25	0.151515	0.0703883		5.25	2.8	4.33333	5.16667		5.25	2.8	0.481481	4.2963
3.25	4.3	0.336634	0.3725		5.25	2.8	2.83333	5		5.25	2.8	3.48148	3.59259
3.6	4.95	0.753974	0.679577		5.25	2.8	5.16667	6.5		5.25	2.8	6.03704	2.22222
3.6	4.95	0.758548	0.708381		5.25	2.8	8	12.3333		5.25	2.8	5.59259	4.05556
5.25	4.15	0.542857	0.5744		3.75	4.9	15.1667	0		3.75	4.9	1.09259	0
3.7	5.6	0.82716	0.788337		3.75	4.9	33.3333	0.333333		3.75	4.9	1.75926	0
3.35	5.75	0.585376	0.522965		3.75	4.9	47.1667	0.666667		3.75	4.9	2.2037	0.0555556
4.45	4.7	0.562874	0.637755		3.75	4.9	44	0.666667		3.75	4.9	1.87037	0.0740741
5.95	3.5	0.786861	0.81374		3.45	3.25	6.83333	0.5		3.45	3.25	0.62963	0.240741
5.95	3.5	0.877402	0.947622		3.45	3.25	5.83333	0		3.45	3.25	0.703704	0.12963
5.95	3.5	0.680637	0.651376		3.45	3.25	18.8333	0.5		3.45	3.25	1.11111	0
5.3	5.05	0.398184	0.437859		3.45	3.25	17.6667	0		3.45	3.25	0.333333	0.0185185
3.45	5.72	0.61559	0.618231		3.15	3.9	26.1667	19.1667		3.15	3.9	14.7593	16.6296
					3.15	3.9	39.1667	24.8333		3.15	3.9	16.7593	16.4074
					2.7	4.65	8.83333	4.5		2.7	4.65	14.2037	5.11111
					2.7	4.65	22.1667	10.8333		2.7	4.65	13.3519	6.46296
					5	4.55	7	3.66667		5	4.55	2.72222	7.33333
					5	4.55	1.16667	10.8333		5	4.55	2.05556	5.92593
					4.1	5	9.66667	13		4.1	5	2.57407	4.2963
					4.1	5	6.16667	14.5		4.1	5	2.25926	4.44444
					5.05	3.15	12.1667	2		5.05	3.15	13.7593	1.25926
					5.05	3.15	28.3333	0.5		5.05	3.15	6.11111	1.22222
					4.9	3.35	3.16667	4		4.9	3.35	1.51852	2.01852
					4.9	3.35	3.16667	4.16667		4.9	3.35	0.685185	1.24074
					4.6	3.1	3.5	1.83333		4.6	3.1	1.2963	1.38889
					4.6	3.1	3.16667	3.33333		4.6	3.1	1.2037	1.2963
					5.1	3.6	66.3333	33.8333		5.1	3.6	10.5926	7.75926
					5.1	3.6	43	71.1667		5.1	3.6	8.96296	4.77778
					4.62	4.35	3.66667	0.833333		4.62	4.35	0.666667	1.07407
					4.62	4.35	1.66667	1		4.62	4.35	2.62963	0.814815
					3.4	4.45	16.6667	2.16667		3.4	4.45	1.59259	1
					3.4	4.45	13.5	5.66667		3.4	4.45	3.33333	1.5
					3.4	4.45	2.33333	1.16667		3.4	4.45	1.11111	0.037037
					3.4	4.45	6	4		3.4	4.45	1.22222	0.0555556
					3.4	4.45	8.66667	6.5		3.4	4.45	3.2963	3.01852
					3.4	4.45	11.5	15.3333		3.4	4.45	3.03704	2.83333
					4	5.35	3.16667	6.5		4	5.35	0.314815	0.518519
					4	5.35	1.33333	4.5		4	5.35	0.351852	0.833333
					4	5.35	32.5	31.6667		4	5.35	9.09259	9.01852
					4	5.35	28.1667	17.8333		4	5.35	6.96296	5.01852
					4.25	5.6	2	4.16667		4.25	5.6	0.259259	0.12963
					4.25	5.6	3	2		4.25	5.6	0.166667	0.111111
					4.25	5.05	8.83333	16.5		4.25	5.05	1.46296	1.38889
					4.25	5.05	8.33333	16.6667		4.25	5.05	1.11111	1.7963
					4.8	4.15	26.6667	6.33333		4.8	4.15	3.31481	3.5
					4.8	4.15	0.833333	2.5		4.8	4.15	3.62963	3.35185
					4.2	3.8	5	18.5		4.2	3.8	1.37037	1.66667
					4.2	3.8	8.33333	20.8333		4.2	3.8	1.16667	1.48148
					4.2	3.8	11	14.3333		4.2	3.8	7.37037	7.61111
					4.2	3.8	25.1667	18.1667		4.2	3.8	9.90741	7.90741
					4.3	3.95	3.16667	11.6667		4.3	3.95	1.2037	2.12963
					4.3	3.95	4.83333	8.33333		4.3	3.95	1.11111	1.48148
					4.9	4.25	5.5	5.16667		4.9	4.25	3.09259	4.81481
					4.9	4.25	0.833333	3		4.9	4.25	1.57407	2.27778
					3.25	4.3	3.66667	4		3.25	4.3	2.31481	2.09259
					3.25	4.3	6.33333	6.16667		3.25	4.3	2.64815	2.55556
					3.6	4.95	22.1667	63.1667		3.6	4.95	3.61111	12.0926
					3.6	4.95	24.8333	69.3333		3.6	4.95	2.98148	13.1852
					3.6	4.95	21.8333	20.1667		3.6	4.95	3.01852	3.2037
					3.6	4.95	24.8333	21.1667		3.6	4.95	3.38889	3.85185
					5.25	4.15	7.33333	17.6667		5.25	4.15	1.7963	9.74074
					5.25	4.15	9.16667	64.3333		5.25	4.15	3.09259	12.4259
					3.7	5.6	7.83333	2.33333		3.7	5.6	0.685185	0.444444
					3.7	5.6	4.5	5.33333		3.7	5.6	0.481481	0.462963
					3.35	5.75	14.3333	20.3333		3.35	5.75	4.05556	4.7963
					3.35	5.75	21	14.6667		3.35	5.75	5.18519	6.16667
					4.45	4.7	5.16667	4.16667		4.45	4.7	2.61111	1.7963
					4.45	4.7	14.1667	13.6667		4.45	4.7	2.7963	2.14815
					5.95	3.5	13.6667	9.83333		5.95	3.5	1.66667	0.907407
					5.95	3.5	20.3333	12.1667		5.95	3.5	2.38889	1.35185
					5.95	3.5	25.6667	20		5.95	3.5	1.40741	0.425926
					5.95	3.5	12.3333	6.16667		5.95	3.5	1.07407	0.277778
					5.95	3.5	16.3333	7		5.95	3.5	3.05556	1.87037
					5.95	3.5	13	14.6667		5.95	3.5	2.51852	2.7037
					5.3	5.05	20.3333	28.1667		5.3	5.05	11.1852	10.7778
					5.3	5.05	33.8333	34.5		5.3	5.05	12.1296	13.7222
					3.45	5.72	36.1667	41.6667		3.45	5.72	8.57407	10.9259
					3.45	5.72	31	42.1667		3.45	5.72	7.40741	8.85185
