# Supplementary material for: Acetylcholine modulates the precision of prediction error in the auditory cortex
Source: eLife. 2024 Jan 19;12:RP91475. doi: 10.7554/eLife.91475 (PMC10942646; doi:10.7554/eLife.91475)
Supplement: Figure 10—source data 1. [file elife-91475-fig10-data1.xlsx]

## Sheet: Figure 10
Depth (um)	Division	SI change
493	AAF	SI increase
493	AAF	SI increase
451	A1	SI decrease
451	A1	SI increase
1018	VAF	SI increase
752	SRAF	SI increase
662	SRAF	SI decrease
662	SRAF	SI decrease
463	PAF	SI increase
463	PAF	SI decrease
463	PAF	SI decrease
525	PAF	SI decrease
685	SRAF	SI increase
685	SRAF	SI increase
464	A1	SI decrease
464	A1	SI decrease
796	VAF	SI increase
796	VAF	SI decrease
540	SRAF	SI increase
540	SRAF	SI decrease
481	A1	SI decrease
481	A1	SI decrease
174	SRAF	SI increase
933	VAF	SI decrease
933	VAF	SI decrease
360	A1	SI decrease
873	A1	SI decrease
752	SRAF	SI increase
887	SRAF	SI decrease
887	SRAF	SI decrease
1043	SRAF	SI increase
1043	SRAF	SI decrease
412	SRAF	SI decrease
412	SRAF	SI decrease
444	A1	SI decrease
444	A1	SI increase
999	A1	SI decrease
999	A1	SI increase
543	A1	SI decrease
363	A1	SI decrease
696	A1	SI decrease
1016	AAF	SI increase
1016	AAF	SI increase
335	VAF	SI decrease
608	AAF	SI increase
608	AAF	SI increase
605	AAF	SI decrease
605	AAF	SI decrease
879	AAF	SI increase
879	AAF	SI increase
689	PAF	SI decrease
585	A1	SI decrease
438	VAF	SI decrease
1066	VAF	SI increase
667	PAF	SI decrease
876	PAF	SI increase
876	PAF	SI increase
410	SRAF	SI increase
614	SRAF	SI decrease
500	A1	SI decrease
500	A1	SI decrease
840	A1	SI increase
840	A1	SI decrease
862	AAF	SI increase
1050	AAF	SI decrease
1050	AAF	SI decrease
120	VAF	SI decrease
120	VAF	SI increase
710	VAF	SI decrease
650	PAF	SI decrease
803	A1	SI decrease
803	A1	SI increase
887	VAF	SI increase
729	VAF	SI decrease
729	VAF	SI increase
1107	SRAF	SI increase
648	AAF	SI decrease
813	AAF	SI increase
813	AAF	SI increase
1065	AAF	SI increase
846	SRAF	SI increase
1191	SRAF	SI increase
640	SRAF	SI increase
539	A1	SI increase
632	A1	SI decrease
785	A1	SI increase
785	A1	SI increase
1050	A1	SI increase
751	SRAF	SI decrease
875	SRAF	SI decrease
461	A1	SI increase
640	SRAF	SI increase
912	SRAF	SI decrease
981	SRAF	SI decrease
642	SRAF	SI decrease
356	PAF	SI increase
356	PAF	SI increase
739	VAF	SI increase
